# Supplementary material for: Machine-Learning-Assisted Analysis of TCR Profiling Data Unveils Cross-Reactivity between SARS-CoV-2 and a Wide Spectrum of Pathogens and Other Diseases
Source: MDPI journal article supplement (doi:10.3390/biology11101531), 2022-10-19
Supplement: s1 [file s1]

Counts of cross-reactive MIRA CDR3 sequences that recognize epitopes of SARS-CoV-2 and other pathogens and diseases (only CD8+ T cell TCRs)

Pathogens & diseases

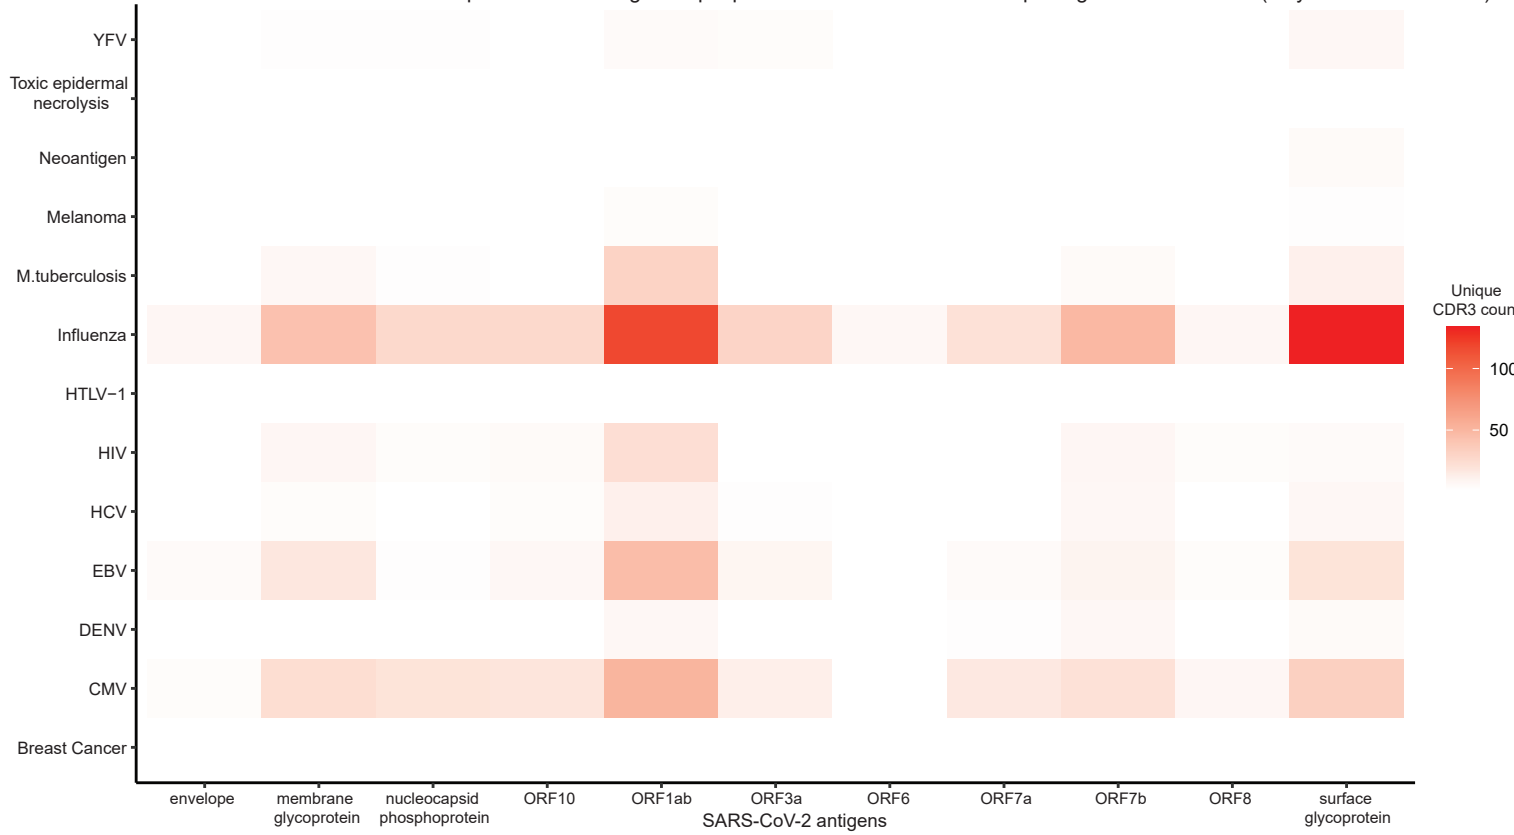

**Figure S1. Cross-reactivity analysis of all Multiplexed Identification of T cell Receptor Antigen (MIRA) T cell receptors (TCRs) only from CD8<sup>+</sup> T cells.** Related to Figure 5. The cross-reactivity is depicted as a heatmap of unique MIRA complementarity-determining region 3 (CDR3) counts that exhibit cross-reactivity between SARS-CoV-2 (x-axis) and other pathogens and diseases (y-axis). The heatmap values correspond to the number of unique cross-reactive CDR3 sequences rather than the frequency of occurrence across MIRA samples.
