# Supplementary material for: Machine-Learning-Assisted Analysis of TCR Profiling Data Unveils Cross-Reactivity between SARS-CoV-2 and a Wide Spectrum of Pathogens and Other Diseases
Source: Biology (Basel). 2022 Oct 19;11(10):1531. doi: 10.3390/biology11101531 (PMC9598299; doi:10.3390/biology11101531)
Supplement: Supplementary file 1 [file biology-11-01531-s001.zip › Supplementary_Tables.xlsx]

## Sheet: Table_S1
PCA loadings. Loadings of features on the two Principal Components. Corresponds to Figure 2D.
PC1	PC2	Feature
0.24065	-0.03491	ORF1ab
-0.09985	0.11612	surface glycoprotein
-0.00133	0.031	ORF3a
0.00074	0.00081	envelope
-0.01619	0.0194	membrane glycoprotein
-0.00032	0.00078	ORF6
-0.00501	-0.00519	ORF7a
0.01317	0.00825	ORF7b
-0.00345	0.00946	ORF8
-0.13123	-0.15411	nucleocapsid phosphoprotein
0.00282	0.00839	ORF10

## Sheet: Table_S2
Unique cross-reactive counts of all MIRA T cell CDR3 sequences. Cross-reactive CDR3 sequences that recognize epitopes from SARS-CoV-2 (MIRA files peptide-detail-ci, peptide-detail-cii and minigene-detail) and other pathogens' and diseases' antigens (CD4+ and CD8+ T cells from McPAS, TCR3d and VDJdb). Corresponds to Figure 5A.
SARS-CoV-2_antigen	Pathogenic_factor	unique_CDR3-mediated_connections
nucleocapsid phosphoprotein	Allergy	1
ORF1ab	Allergy	3
ORF7a	Allergy	1
surface glycoprotein	Allergy	1
membrane glycoprotein	Breast Cancer	1
ORF10	Breast Cancer	1
ORF1ab	Breast Cancer	1
ORF7a	Breast Cancer	1
ORF7b	Breast Cancer	1
ORF8	Breast Cancer	1
envelope	Celiac disease	2
membrane glycoprotein	Celiac disease	7
nucleocapsid phosphoprotein	Celiac disease	3
ORF10	Celiac disease	5
ORF1ab	Celiac disease	20
ORF3a	Celiac disease	7
ORF6	Celiac disease	2
ORF7a	Celiac disease	3
ORF7b	Celiac disease	7
ORF8	Celiac disease	2
surface glycoprotein	Celiac disease	19
envelope	CMV	4
membrane glycoprotein	CMV	26
nucleocapsid phosphoprotein	CMV	22
ORF10	CMV	19
ORF1ab	CMV	51
ORF3a	CMV	14
ORF6	CMV	1
ORF7a	CMV	17
ORF7b	CMV	21
ORF8	CMV	8
surface glycoprotein	CMV	34
envelope	DENV	1
membrane glycoprotein	DENV	2
nucleocapsid phosphoprotein	DENV	2
ORF10	DENV	2
ORF1ab	DENV	7
ORF3a	DENV	2
ORF7a	DENV	3
ORF7b	DENV	7
ORF8	DENV	1
surface glycoprotein	DENV	6
membrane glycoprotein	Diabetes Type 1	3
nucleocapsid phosphoprotein	Diabetes Type 1	2
ORF1ab	Diabetes Type 1	5
ORF3a	Diabetes Type 1	2
ORF7b	Diabetes Type 1	1
surface glycoprotein	Diabetes Type 1	3
envelope	EBV	5
membrane glycoprotein	EBV	19
nucleocapsid phosphoprotein	EBV	4
ORF10	EBV	7
ORF1ab	EBV	46
ORF3a	EBV	9
ORF6	EBV	1
ORF7a	EBV	5
ORF7b	EBV	11
ORF8	EBV	4
surface glycoprotein	EBV	24
membrane glycoprotein	HCV	7
nucleocapsid phosphoprotein	HCV	2
ORF10	HCV	4
ORF1ab	HCV	14
ORF3a	HCV	3
ORF6	HCV	1
ORF7b	HCV	7
ORF8	HCV	2
surface glycoprotein	HCV	9
membrane glycoprotein	HIV	11
nucleocapsid phosphoprotein	HIV	4
ORF10	HIV	7
ORF1ab	HIV	25
ORF3a	HIV	1
ORF7b	HIV	8
ORF8	HIV	4
surface glycoprotein	HIV	8
nucleocapsid phosphoprotein	HTLV-1	1
ORF1ab	HTLV-1	1
ORF3a	HTLV-1	1
membrane glycoprotein	Inflammatory bowel disease (IBD)	1
nucleocapsid phosphoprotein	Inflammatory bowel disease (IBD)	2
ORF10	Inflammatory bowel disease (IBD)	2
ORF1ab	Inflammatory bowel disease (IBD)	3
ORF3a	Inflammatory bowel disease (IBD)	3
ORF7a	Inflammatory bowel disease (IBD)	2
ORF7b	Inflammatory bowel disease (IBD)	2
ORF8	Inflammatory bowel disease (IBD)	1
surface glycoprotein	Inflammatory bowel disease (IBD)	1
envelope	Influenza	9
membrane glycoprotein	Influenza	45
nucleocapsid phosphoprotein	Influenza	29
ORF10	Influenza	27
ORF1ab	Influenza	123
ORF3a	Influenza	35
ORF6	Influenza	7
ORF7a	Influenza	21
ORF7b	Influenza	50
ORF8	Influenza	8
surface glycoprotein	Influenza	144
envelope	M.tuberculosis	6
membrane glycoprotein	M.tuberculosis	79
nucleocapsid phosphoprotein	M.tuberculosis	51
ORF10	M.tuberculosis	45
ORF1ab	M.tuberculosis	271
ORF3a	M.tuberculosis	43
ORF6	M.tuberculosis	9
ORF7a	M.tuberculosis	22
ORF7b	M.tuberculosis	77
ORF8	M.tuberculosis	17
surface glycoprotein	M.tuberculosis	127
envelope	Melanoma	1
membrane glycoprotein	Melanoma	2
nucleocapsid phosphoprotein	Melanoma	1
ORF10	Melanoma	2
ORF1ab	Melanoma	9
ORF3a	Melanoma	1
ORF7a	Melanoma	1
ORF7b	Melanoma	3
surface glycoprotein	Melanoma	7
envelope	Neoantigen	1
membrane glycoprotein	Neoantigen	20
nucleocapsid phosphoprotein	Neoantigen	9
ORF10	Neoantigen	10
ORF1ab	Neoantigen	59
ORF3a	Neoantigen	10
ORF6	Neoantigen	5
ORF7a	Neoantigen	4
ORF7b	Neoantigen	25
surface glycoprotein	Neoantigen	35
membrane glycoprotein	Psoriatic arthritis	1
nucleocapsid phosphoprotein	Psoriatic arthritis	2
ORF10	Psoriatic arthritis	2
ORF1ab	Psoriatic arthritis	4
ORF3a	Psoriatic arthritis	1
ORF7b	Psoriatic arthritis	1
surface glycoprotein	Psoriatic arthritis	2
ORF3a	Toxic epidermal necrolysis	1
ORF7b	Toxic epidermal necrolysis	2
surface glycoprotein	Toxic epidermal necrolysis	1
envelope	YFV	1
membrane glycoprotein	YFV	5
nucleocapsid phosphoprotein	YFV	4
ORF10	YFV	4
ORF1ab	YFV	9
ORF3a	YFV	4
ORF7b	YFV	4
surface glycoprotein	YFV	11

## Sheet: Table_S3
Unique cross-reactive counts of MIRA CD8+ T cell CDR3 sequences. Cross-reactive CDR3 sequences that recognize epitopes from SARS-CoV-2 (MIRA file peptide-detail-ci) and other pathogens' and diseases' antigens (CD8+ T cells from McPAS, TCR3d and VDJdb). Corresponds to Figure S1.
SARS-CoV-2_antigen	Pathogenic_factor	unique_CDR3-mediated_connections
membrane glycoprotein	Breast Cancer	1
ORF10	Breast Cancer	1
ORF1ab	Breast Cancer	1
ORF7a	Breast Cancer	1
ORF7b	Breast Cancer	1
ORF8	Breast Cancer	1
envelope	CMV	4
membrane glycoprotein	CMV	24
nucleocapsid phosphoprotein	CMV	20
ORF10	CMV	19
ORF1ab	CMV	51
ORF3a	CMV	13
ORF6	CMV	1
ORF7a	CMV	17
ORF7b	CMV	21
ORF8	CMV	8
surface glycoprotein	CMV	33
envelope	DENV	1
membrane glycoprotein	DENV	2
nucleocapsid phosphoprotein	DENV	2
ORF10	DENV	2
ORF1ab	DENV	7
ORF3a	DENV	2
ORF7a	DENV	3
ORF7b	DENV	7
ORF8	DENV	1
surface glycoprotein	DENV	6
envelope	EBV	5
membrane glycoprotein	EBV	18
nucleocapsid phosphoprotein	EBV	3
ORF10	EBV	7
ORF1ab	EBV	46
ORF3a	EBV	9
ORF6	EBV	1
ORF7a	EBV	5
ORF7b	EBV	10
ORF8	EBV	4
surface glycoprotein	EBV	20
membrane glycoprotein	HCV	4
nucleocapsid phosphoprotein	HCV	1
ORF10	HCV	4
ORF1ab	HCV	12
ORF3a	HCV	3
ORF6	HCV	1
ORF7b	HCV	7
ORF8	HCV	1
surface glycoprotein	HCV	7
membrane glycoprotein	HIV	9
nucleocapsid phosphoprotein	HIV	4
ORF10	HIV	7
ORF1ab	HIV	24
ORF3a	HIV	1
ORF7b	HIV	8
ORF8	HIV	4
surface glycoprotein	HIV	6
nucleocapsid phosphoprotein	HTLV-1	1
ORF1ab	HTLV-1	1
ORF3a	HTLV-1	1
envelope	Influenza	8
membrane glycoprotein	Influenza	43
nucleocapsid phosphoprotein	Influenza	27
ORF10	Influenza	27
ORF1ab	Influenza	118
ORF3a	Influenza	30
ORF6	Influenza	7
ORF7a	Influenza	21
ORF7b	Influenza	49
ORF8	Influenza	8
surface glycoprotein	Influenza	134
membrane glycoprotein	M.tuberculosis	7
nucleocapsid phosphoprotein	M.tuberculosis	3
ORF10	M.tuberculosis	1
ORF1ab	M.tuberculosis	31
ORF3a	M.tuberculosis	1
ORF6	M.tuberculosis	1
ORF7a	M.tuberculosis	1
ORF7b	M.tuberculosis	6
ORF8	M.tuberculosis	1
surface glycoprotein	M.tuberculosis	12
envelope	Melanoma	1
ORF10	Melanoma	1
ORF1ab	Melanoma	4
ORF3a	Melanoma	1
ORF7b	Melanoma	2
surface glycoprotein	Melanoma	3
ORF1ab	Neoantigen	1
ORF3a	Neoantigen	2
ORF6	Neoantigen	1
surface glycoprotein	Neoantigen	6
ORF3a	Toxic epidermal necrolysis	1
ORF7b	Toxic epidermal necrolysis	2
envelope	YFV	1
membrane glycoprotein	YFV	3
nucleocapsid phosphoprotein	YFV	3
ORF10	YFV	2
ORF1ab	YFV	5
ORF3a	YFV	4
ORF7b	YFV	2
surface glycoprotein	YFV	7

## Sheet: Table_S4
Unique cross-reactive counts of MIRA CD4+ T cell CDR3 sequences. Cross-reactive CDR3 sequences that recognize epitopes from SARS-CoV-2 (MIRA file peptide-detail-cii) and other pathogens' and diseases' antigens (CD4+ T cells from McPAS, TCR3d and VDJdb).
SARS-CoV-2_antigen	Pathogenic_factor	unique_CDR3-mediated_connections
membrane glycoprotein	Celiac disease	1
surface glycoprotein	Celiac disease	3
membrane glycoprotein	Diabetes Type 1	1
nucleocapsid phosphoprotein	Diabetes Type 1	2
surface glycoprotein	Diabetes Type 1	1
membrane glycoprotein	HIV	1
surface glycoprotein	HIV	1
ORF7a	Inflammatory bowel disease (IBD)	1
surface glycoprotein	Inflammatory bowel disease (IBD)	1
membrane glycoprotein	M.tuberculosis	2
nucleocapsid phosphoprotein	M.tuberculosis	8
ORF3a	M.tuberculosis	4
surface glycoprotein	M.tuberculosis	15

## Sheet: Table_S5
All MIRA cross-reactive CDR3 sequences and the corresponding recognized epitopes from MIRA and external databases. Cross-reactive CDR3 sequences that recognize epitopes from SARS-CoV-2 (MIRA files peptide-detail-ci, peptide-detail-cii and minigene-detail) and other pathogens' and diseases' antigens (CD4+ and CD8+ T cells from McPAS, TCR3d and VDJdb). In this table we have both SARS-CoV-2 epitopes…
CDR3	ORF in SC2	Pathogens and diseases	T_cell_type_in_public_TCR_databases	SC2_epitope	Pathogen_protein	Pathogen_epitope	MIRA_repository_source
CASSDSYGYTF	surface glycoprotein	HCV	CD8	TLLALHRSYLTPGDSSSGWTAGAAAYYVGYLQPRTFLLKYNEN,YLQPRTFL,YLQPRTFLL,YYVGYLQPRTF	NS3	KLVALGINAV	peptideci minigene
CASRRDRGQETQYF	surface glycoprotein	Influenza	CD8	YAWNRKRISNCVADYSVLYNSASFSTFKCYGVSPTKLNDLCFT	NP177	LPRRSGAAGA	minigene
CASSGNTGELFF	surface glycoprotein	HIV	CD8	YAWNRKRISNCVADYSVLYNSASFSTFKCYGVSPTKLNDLCFT	Gag	KRWIILGLNK	minigene peptideci
CASSYRANTEAFF	surface glycoprotein	Influenza	CD8	YAWNRKRISNCVADYSVLYNSASFSTFKCYGVSPTKLNDLCFT	NP177	LPRRSGAAGA	minigene
CASSLRATYEQYF	surface glycoprotein	Influenza	CD8	YAWNRKRISNCVADYSVLYNSASFSTFKCYGVSPTKLNDLCFT	NP177	LPRRSGAAGA	minigene
CASSYRSSYNSPLHF	surface glycoprotein	M.tuberculosis	CD4	YAWNRKRISNCVADYSVLYNSASFSTFKCYGVSPTKLNDLCFT	NA	NA	minigene
CASSYRDSYEQYF	surface glycoprotein	EBV	CD8	YAWNRKRISNCVADYSVLYNSASFSTFKCYGVSPTKLNDLCFT	BMLF-1	GLCTLVAML	minigene
CASSPRSNQPQHF	surface glycoprotein	Influenza	CD8	YAWNRKRISNCVADYSVLYNSASFSTFKCYGVSPTKLNDLCFT	M	GILGFVFTL	minigene
CASSFRSSYEQYF	surface glycoprotein	Influenza	CD8	YAWNRKRISNCVADYSVLYNSASFSTFKCYGVSPTKLNDLCFT,FFSNVTWFH,FLPFFSNVT,LPFFSNVTW,LPFFSNVTWF,PFFSNVTWF,SNVTWFHAI	Matrix protein (M1)	GILGFVFTL	minigene peptideci
CASSLSGTAYGYTF	surface glycoprotein	Influenza	CD8	LPDDFTGCVIAWNSNNLDSKVGGNYNYLYRLFRKSNLKPFERD	NP177	LPRRSGAAGA	minigene
CASSPGLAYEQYF	surface glycoprotein	YFV	CD8	ARSVASQSIIAYTMSLGAENSVAYSNNSIAIPTNFTISVTTEI	YFV-17D	LLWNGPMAV	minigene peptideci
CASSFGPTAYEQYF	surface glycoprotein	EBV	CD8	ARSVASQSIIAYTMSLGAENSVAYSNNSIAIPTNFTISVTTEI	BMLF-1	GLCTLVAML	minigene
CASSPSTDTQYF	surface glycoprotein	M.tuberculosis	CD4	ILSRLDKVEAEVQIDRLITGRLQSLQTYVTQQLIRAAEIRASA,KVFRSSVLH,VYYPDKVFR,YPDKVFRSS,YPDKVFRSSV	NA	NA	peptideci minigene
CASSPAYEQYF	ORF3a	Influenza	CD8	ATIPIQASLPFGWLIVGVALLAVFQSASKIITLKKRWQ	NP177	LPRRSGAAGA	minigene peptideci
CASSPAYEQYF	ORF3a	CMV	CD8	ATIPIQASLPFGWLIVGVALLAVFQSASKIITLKKRWQ	pp65	TPRVTGGGAM	minigene peptideci
CASSEVYEQYF	ORF3a	M.tuberculosis	CD4	LKKRWQLALSKGVHFVCNLLLLFVTVYSHLLLVAAGLE,ALSKGVHFV	NA	NA	peptideci minigene
CASSLGGGNTEAFF	nucleocapsid phosphoprotein	Influenza	CD8	DLSPRWYFYYLGTGPEAGLPYGANKDGIIWVATEGALN,KAYNVTQAF	NP177	LPRRSGAAGA	minigene peptideci
CASSLAGGTEAFF	nucleocapsid phosphoprotein	Neoantigen		DLSPRWYFYYLGTGPEAGLPYGANKDGIIWVATEGALN,LSPRWYFYY,SPRWYFYYL	TRPV3-LLL-A8V	LLLNMLIVL	peptideci minigene peptidecii
CASSLAGGTEAFF	nucleocapsid phosphoprotein	M.tuberculosis	CD4	DLSPRWYFYYLGTGPEAGLPYGANKDGIIWVATEGALN,LSPRWYFYY,SPRWYFYYL	NA	NA	peptideci minigene peptidecii
CASSLGQGSYEQYF	ORF1ab	DENV	CD8	GEIPVAYRKVLL,VPHVGEIPVAY,YQKVGMQKY			peptideci
CASSLGQGTYEQYF	ORF1ab	Neoantigen		GEIPVAYRKVLL,VPHVGEIPVAY	ST6GALNAC2-LLF-Y6H	LLFALHFSA	peptideci
CASSLGQGTYEQYF	ORF1ab	DENV	CD8	GEIPVAYRKVLL,VPHVGEIPVAY			peptideci
CASSPGVNTEAFF	ORF1ab	M.tuberculosis	CD4	GEIPVAYRKVLL,VPHVGEIPVAY	NA	NA	peptideci
CASSEGQGYEQYF	ORF1ab	Neoantigen		GEIPVAYRKVLL,VPHVGEIPVAY,HTTDPSFLGRY	TEAD1-VLE-L8F	VLENFTIFLV	peptideci
CASSFGQGYEQYF	ORF1ab	Neoantigen		GEIPVAYRKVLL,VPHVGEIPVAY,QLMCQPILL,QLMCQPILLL,FLNGSCGSV	GLRA1-LIF,GNL3L-R4C	LIFNMFYWI,NLNCCSVPV	peptideci
CASSDRETDTQYF	ORF1ab	M.tuberculosis	CD8	GEIPVAYRKVLL,VPHVGEIPVAY	NA	NA	peptideci
CASSQAGGYEQYF	ORF1ab	Neoantigen		GEIPVAYRKVLL,VPHVGEIPVAY	GNL3L-R4C	NLNCCSVPV	peptideci
CASSFGGGTYEQYF	ORF1ab	Celiac disease	CD4	GEIPVAYRKVLL,VPHVGEIPVAY	DQ2-a-II	PQPELPYPQPE	peptideci
CASSLEAGYGYTF	ORF1ab	M.tuberculosis	CD4	GEIPVAYRKVLL,VPHVGEIPVAY	NA	NA	peptideci
CASSYSSGTEAFF	ORF1ab	Neoantigen		SEVGPEHSLAEY	GANAB	ALYGSVPVL	peptideci
CASSSGWEQYF	ORF1ab	M.tuberculosis	CD4	SEVGPEHSLAEY	NA	NA	peptideci
CASSLEGTGYYEQYF	ORF1ab	EBV	CD8	SEVGPEHSLAEY	BMLF-1	GLCTLVAML	peptideci
CASSLGGYEQYF	ORF1ab	EBV	CD8	SEVGPEHSLAEY,HTTDPSFLGRY,ILHCANFNV,FVDGVPFVV,VLWAHGFEL,YLNTLTLAV	BMLF-1	GLCTLVAML	peptideci
CASSLGGYEQYF	ORF1ab	Influenza	CD8	SEVGPEHSLAEY,HTTDPSFLGRY,ILHCANFNV,FVDGVPFVV,VLWAHGFEL,YLNTLTLAV	NP177	LPRRSGAAGA	peptideci
CASSLEGHYEQYF	ORF1ab	M.tuberculosis	CD4	APKEIIFL,KEIIFLEGETL	NA	NA	peptideci
CASSLRTRAYEQYF	ORF1ab	M.tuberculosis	CD4	APKEIIFL,KEIIFLEGETL	NA	NA	peptideci
CASSPGTAYEQYF	ORF1ab	YFV	CD8	APKEIIFL,KEIIFLEGETL,DTDFVNEFYAY,NRDVDTDFVNEFY,AEIPKEEVKPF,ASKIITLKK,SASKIITLK	YFV-17D	LLWNGPMAV	peptideci
CASSPGTAYEQYF	ORF1ab	Neoantigen		APKEIIFL,KEIIFLEGETL,DTDFVNEFYAY,NRDVDTDFVNEFY,AEIPKEEVKPF,ASKIITLKK,SASKIITLK	ATP6AP1-KLG-G3W	KLWASPLHV	peptideci
CASSLLNTEAFF	ORF1ab	Influenza	CD8	APKEIIFL,KEIIFLEGETL,TVLSFCAFA,VLSFCAFAV,KLSYGIATV	NP177	LPRRSGAAGA	peptideci
CASSPPRTDTQYF	ORF1ab	HTLV-1	CD8	APKEIIFL,KEIIFLEGETL	Tax-1	SFHSLHLLF	peptideci
CASSLGEAFF	ORF1ab	Influenza	CD8	APKEIIFL,KEIIFLEGETL	NP177	LPRRSGAAGA	peptideci
CASSLGTEAFF	ORF1ab	Influenza	CD8	APKEIIFL,KEIIFLEGETL,RQLLFVVEV	NP177	LPRRSGAAGA	peptideci
CASSLWAGETQYF	ORF1ab	Neoantigen		APKEIIFL,KEIIFLEGETL	GNL3L-R4C	NLNCCSVPV	peptideci
CASSLGQSYEQYF	ORF1ab	M.tuberculosis	CD4	APKEIIFL,KEIIFLEGETL,HTTDPSFLGRY	NA	NA	peptideci
CASSPGTYEQYF	ORF1ab	Influenza	CD8	APKEIIFL,KEIIFLEGETL	NP177	LPRRSGAAGA	peptideci
CASSQPGQGDGYTF	ORF1ab	M.tuberculosis	CD8	APKEIIFL,KEIIFLEGETL	NA	NA	peptideci
CASSFTDTQYF	ORF1ab	CMV	CD8	APKEIIFL,KEIIFLEGETL,AEAELAKNVSL,AELAKNVSLDNVL	IE-1	CRVLCCYVL	peptideci
CASSFTDTQYF	ORF1ab	M.tuberculosis	CD4	APKEIIFL,KEIIFLEGETL,AEAELAKNVSL,AELAKNVSLDNVL	NA	NA	peptideci
CASSGGDINEQFF	ORF1ab	M.tuberculosis	CD8	APKEIIFL,KEIIFLEGETL	NA	NA	peptideci
CASSFTEAFF	ORF1ab	M.tuberculosis	CD8	APKEIIFL,KEIIFLEGETL	NA	NA	peptideci
CASSLDTDTQYF	ORF1ab	EBV	CD8	APKEIIFL,KEIIFLEGETL	BMLF-1	GLCTLVAML	peptideci
CASSLTGELFF	ORF1ab	M.tuberculosis	CD4	APKEIIFL,KEIIFLEGETL,HTTDPSFLGRY	NA	NA	peptideci
CASSQGGTEAFF	ORF1ab	Influenza	CD8	APKEIIFL,KEIIFLEGETL,FLNGSCGSV,FVDGVPFVV	NP177	LPRRSGAAGA	peptideci
CASSLGETQYF	ORF1ab	Influenza	CD8	APKEIIFL,KEIIFLEGETL,FLCLFLLPSL,FLLPSLATV,RQLLFVVEV	NP177	LPRRSGAAGA	peptideci
CASSLGETQYF	ORF1ab	M.tuberculosis	CD4	APKEIIFL,KEIIFLEGETL,FLCLFLLPSL,FLLPSLATV,RQLLFVVEV	NA	NA	peptideci
CASSSGQRDTQYF	ORF1ab	M.tuberculosis	CD4	APKEIIFL,KEIIFLEGETL	NA	NA	peptideci
CASSFQGTEAFF	ORF1ab	EBV	CD8	APKEIIFL,KEIIFLEGETL	BMLF-1	GLCTLVAML	peptideci
CASSLGYEQYF	ORF1ab	Influenza	CD8	APKEIIFL,KEIIFLEGETL,HTTDPSFLGRY,FLNGSCGSV	NP177	LPRRSGAAGA	peptideci
CASSLGYEQYF	ORF1ab	Celiac disease	CD4	APKEIIFL,KEIIFLEGETL,HTTDPSFLGRY,FLNGSCGSV	NA	NA	peptideci
CASSLGYEQYF	ORF1ab	M.tuberculosis	CD4	APKEIIFL,KEIIFLEGETL,HTTDPSFLGRY,FLNGSCGSV	NA	NA	peptideci
CASSESGSSYEQYF	ORF1ab	M.tuberculosis	CD4	APKEIIFL,KEIIFLEGETL	NA	NA	peptideci
CASSLDSYEQYF	ORF1ab	HIV	CD8	APKEIIFL,KEIIFLEGETL,FLNGSCGSV,KLSYGIATV	Gag,p24 KK10	KRWIILGLNK	peptideci
CASSFGTEAFF	ORF1ab	Celiac disease	CD4	APKEIIFL,KEIIFLEGETL,FVDGVPFVV	NA	NA	peptideci
CASSLGASYEQYF	ORF1ab	M.tuberculosis	CD4	APKEIIFL,KEIIFLEGETL,FLNGSCGSV,FVDGVPFVV	NA	NA	peptideci
CASSSNEKLFF	ORF1ab	M.tuberculosis	CD4	KPLEFGATSAAL	NA	NA	peptideci
CASSLVAGTYNEQFF	ORF1ab	HIV	CD8	KPLEFGATSAAL	Gag	KRWIILGLNK	peptideci
CASSPNTEAFF	ORF1ab	CMV	CD8	KPLEFGATSAAL	pp65	RPHERNGFTVL	peptideci
CASSPDPYEQYF	ORF1ab	Neoantigen		KPLEFGATSAAL	MRM1	LLFGMTPCL	peptideci
CASSLGGEETQYF	ORF1ab	EBV	CD8	KPLEFGATSAAL,APAHISTI,LIVNSVLLFL,LLFLAFVVFL,SVLLFLAFV	BMLF-1	GLCTLVAML	peptideci
CASRDRGLGQPQHF	ORF1ab	CMV	CD8	KPLEFGATSAAL	pp65	MLNIPSINV	peptideci
CASSLTGGYNEQFF	ORF1ab	EBV	CD8	KPLEFGATSAAL	EBNA1	HPVGEADYFEY	peptideci
CASSIVSNQPQHF	ORF1ab	Influenza	CD8	KPLEFGATSAAL	M	GILGFVFTL	peptideci
CASSLLAGGTDTQYF	ORF1ab	HIV	CD8	KPLEFGATSAAL,FLNGSCGSV	Gag p24	KRWIILGLNK	peptideci
CASSLLAGGTDTQYF	ORF1ab	Influenza	CD8	KPLEFGATSAAL,FLNGSCGSV	NP177	LPRRSGAAGA	peptideci
CASSYGTGDGYTF	ORF1ab	Melanoma		YLKLTDNVYIK	Melan-A/MART-1	ELAGIGILTV	peptideci
CASSITSSYNEQFF	ORF1ab	Influenza	CD8	LLSAGIFGA	M	GILGFVFTL	peptideci
CASSPTSGGYEQYF	ORF1ab	EBV	CD8	ALRKVPTDNYITTY,KVPTDNYITTY	BMLF-1	GLCTLVAML	peptideci
CASSPTSGGYEQYF	ORF1ab	Neoantigen		ALRKVPTDNYITTY,KVPTDNYITTY	CHD8-KLN	KLNTITPVV	peptideci
CASSLGGTDTQYF	ORF1ab	M.tuberculosis	CD4	ALRKVPTDNYITTY,KVPTDNYITTY	NA	NA	peptideci peptidecii
CASSFRDSSYEQYF	ORF1ab	Neoantigen		ALRKVPTDNYITTY,KVPTDNYITTY,LLDDFVEII,LLLDDFVEI	MLL2-L8H	ALSPVIPHI	peptideci
CASSYGGSSYEQYF	ORF1ab	Neoantigen		ALRKVPTDNYITTY,KVPTDNYITTY,KLSYGIATV,LLDDFVEII,LLLDDFVEI	ZDHHC7-SLL-P7L	SLLWMNLFV	peptideci
CASSLAPSYEQYF	ORF1ab	EBV	CD8	ILGTVSWNL,SNEKQEILGTVSW	BZLF1,BZLF-1	RAKFKQLL	peptideci
CASSWDSSYEQYF	ORF1ab	CMV	CD8	ILGTVSWNL,SNEKQEILGTVSW,FVDGVPFVV	pp50	VTEHDTLLY	peptideci
CASSWDSSYEQYF	ORF1ab	Influenza	CD8	ILGTVSWNL,SNEKQEILGTVSW,FVDGVPFVV	NP177	LPRRSGAAGA	peptideci
CASRGRSSYEQYF	ORF1ab	Influenza	CD8	ILGTVSWNL,SNEKQEILGTVSW	Matrix protein (M1)	GILGFVFTL	peptideci
CASSYGYEQYF	ORF1ab	M.tuberculosis	CD4	ILGTVSWNL,SNEKQEILGTVSW,FLNGSCGSV,FVDGVPFVV	NA	NA	peptideci
CASSPNTDTQYF	ORF1ab	M.tuberculosis	CD4	ILGTVSWNL,SNEKQEILGTVSW,GVYDYLVST,TLGVYDYLV	NA	NA	peptideci
CASSVSGNTIYF	ORF1ab	M.tuberculosis	CD4	ILGTVSWNL,SNEKQEILGTVSW	NA	NA	peptideci
CASSLDGNTEAFF	ORF1ab	CMV	CD8	ILGTVSWNL,SNEKQEILGTVSW	UL29/28	FRCPRRFCF	peptideci
CASSLDGNTEAFF	ORF1ab	M.tuberculosis	CD4	ILGTVSWNL,SNEKQEILGTVSW	NA	NA	peptideci
CASSSDSYEQYF	ORF1ab	Influenza	CD8	HTTDPSFLGRY,FLNGSCGSV	NP177	LPRRSGAAGA	peptideci
CASSIGASTDTQYF	ORF1ab	Diabetes Type 1	CD4	HTTDPSFLGRY	NA	NA	peptideci
CASSLEGDQPQHF	ORF1ab	Influenza	CD8	HTTDPSFLGRY	NP177	LPRRSGAAGA	peptideci
CASSPRDSNQPQHF	ORF1ab	M.tuberculosis	CD4	HTTDPSFLGRY	NA	NA	peptideci
CASSTEETQYF	ORF1ab	CMV	CD8	HTTDPSFLGRY	pp65	NLVPMVATV	peptideci
CASSLLGTGELFF	ORF1ab	M.tuberculosis	CD4	HTTDPSFLGRY	NA	NA	peptideci
CASSPTDSNQPQHF	ORF1ab	M.tuberculosis	CD8	HTTDPSFLGRY	NA	NA	peptideci
CASSWDSSYNEQFF	ORF1ab	EBV	CD8	HTTDPSFLGRY	BMLF-1	GLCTLVAML	peptideci
CASSLTDSYEQYF	ORF1ab	EBV	CD8	HTTDPSFLGRY,KLSYGIATV	BMLF-1	GLCTLVAML	peptideci
CASSSVNEQFF	ORF1ab	Influenza	CD8	HTTDPSFLGRY	NP177	LPRRSGAAGA	peptideci
CASSSVNEQFF	ORF1ab	CMV	CD8	HTTDPSFLGRY	pp65	NLVPMVATV	peptideci
CASSFDSYEQYF	ORF1ab	Influenza	CD8	HTTDPSFLGRY,FLNGSCGSV,FVDGVPFVV	NP177	LPRRSGAAGA	peptideci
CASSFDSYEQYF	ORF1ab	HIV	CD8	HTTDPSFLGRY,FLNGSCGSV,FVDGVPFVV	Gag	KRWIILGLNK	peptideci
CASSLRGVTDTQYF	ORF1ab	M.tuberculosis	CD4	HTTDPSFLGRY	NA	NA	peptideci
CASSEGYEQYF	ORF1ab	M.tuberculosis	CD4	HTTDPSFLGRY,FLNGSCGSV	NA	NA	peptideci
CASSSPNTEAFF	ORF1ab	EBV	CD8	HTTDPSFLGRY	BZLF1	RAKFKQLL	peptideci
CASSPDSPYEQYF	ORF1ab	Influenza	CD8	HTTDPSFLGRY	NP177	LPRRSGAAGA	peptideci
CASSFGGSYEQYF	ORF1ab	Allergy		HTTDPSFLGRY	NA	NA	peptideci
CASSLEGSYEQYF	ORF1ab	EBV	CD8	HTTDPSFLGRY	BZLF1,BZLF-1	RAKFKQLL	peptideci
CASSLEGSYEQYF	ORF1ab	HCV	CD8	HTTDPSFLGRY	NS3	KLVALGINAV	peptideci
CASSPRDSTDTQYF	ORF1ab	Influenza	CD8	HTTDPSFLGRY	NP177	LPRRSGAAGA	peptideci
CASSPPGGSYNEQFF	ORF1ab	Influenza	CD8	HTTDPSFLGRY	NP177	LPRRSGAAGA	peptideci
CASSPRQAQETQYF	ORF1ab	M.tuberculosis	CD4	HTTDPSFLGRY	NA	NA	peptideci
CASSLSGQETDTQYF	ORF1ab	EBV	CD8	HTTDPSFLGRY	BMLF-1	GLCTLVAML	peptideci
CASSLSGDEQYF	ORF1ab	YFV		HTTDPSFLGRY	YFV-LLW	LLWNGPMAV	peptideci
CASSAGAYEQYF	ORF1ab	CMV	CD8	HTTDPSFLGRY	IE-1	CRVLCCYVL	peptideci
CASSLSQGAETQYF	ORF1ab	Allergy	CD4	HTTDPSFLGRY	Beryllium sulfate	FWIDLFETIG	peptideci
CASSLQDSYEQYF	ORF1ab	M.tuberculosis	CD4	HTTDPSFLGRY	NA	NA	peptideci
CASSLRQGTDTQYF	ORF1ab	Influenza	CD8	HTTDPSFLGRY	NP177	LPRRSGAAGA	peptideci
CASSSGGGEQYF	ORF1ab	CMV	CD8	HTTDPSFLGRY	pp65	MLNIPSINV	peptideci
CASSAGQGSYEQYF	ORF1ab	M.tuberculosis	CD4	HTTDPSFLGRY	NA	NA	peptideci
CASSQGTAYGYTF	ORF1ab	EBV	CD8	HTTDPSFLGRY	BMLF-1	GLCTLVAML	peptideci
CASSLDGNTGELFF	ORF1ab	M.tuberculosis	CD4	HTTDPSFLGRY	NA	NA	peptideci
CASSPTSGSYNEQFF	ORF1ab	M.tuberculosis	CD4	HTTDPSFLGRY	NA	NA	peptideci
CASSETSGSTDTQYF	ORF1ab	M.tuberculosis	CD8	HTTDPSFLGRY	NA	NA	peptideci
CASSLGDSSYEQYF	ORF1ab	CMV	CD8	HTTDPSFLGRY	pp65	RPHERNGFTVL	peptideci
CASAAGGPTDTQYF	ORF1ab	M.tuberculosis	CD8	HTTDPSFLGRY	NA	NA	peptideci
CASSDRDNSPLHF	ORF1ab	M.tuberculosis	CD8	HTTDPSFLGRY	NA	NA	peptideci
CASSPGTDTQYF	ORF1ab	CMV	CD8	HTTDPSFLGRY,APAHISTI,LIVNSVLLFL,LLFLAFVVFL,SVLLFLAFV	pp50	VTEHDTLLY	peptideci
CASSPGTDTQYF	ORF1ab	EBV	CD8	HTTDPSFLGRY,APAHISTI,LIVNSVLLFL,LLFLAFVVFL,SVLLFLAFV	BMLF-1	GLCTLVAML	peptideci
CASSPGTDTQYF	ORF1ab	Influenza	CD8	HTTDPSFLGRY,APAHISTI,LIVNSVLLFL,LLFLAFVVFL,SVLLFLAFV	NP177	LPRRSGAAGA	peptideci
CASSPGGNQPQHF	ORF1ab	Influenza	CD8	HTTDPSFLGRY	NP177	LPRRSGAAGA	peptideci
CASSLTGGTDTQYF	ORF1ab	M.tuberculosis	CD4	HTTDPSFLGRY	NA	NA	peptideci
CASNSGGAYNEQFF	ORF1ab	Neoantigen		HTTDPSFLGRY	WDR46-FLT	FLTYLDVSV	peptideci
CASSLSSNEQFF	ORF1ab	M.tuberculosis	CD4	HTTDPSFLGRY	NA	NA	peptideci
CASSDSSGANVLTF	ORF1ab	Celiac disease	CD4	HTTDPSFLGRY	NA	NA	peptideci
CASSDSSGANVLTF	ORF1ab	M.tuberculosis	CD4 CD8	HTTDPSFLGRY	NA	NA	peptideci
CASSYSTGGYEQYF	ORF1ab	M.tuberculosis	CD8	HTTDPSFLGRY	NA	NA	peptideci
CASSQERGGQETQYF	ORF1ab	M.tuberculosis	CD8	HTTDPSFLGRY	NA	NA	peptideci
CASSLGGVEQYF	ORF1ab	M.tuberculosis	CD4	HTTDPSFLGRY,YLNTLTLAV	NA	NA	peptideci
CASSPGTVAYEQYF	ORF1ab	YFV	CD8	HTTDPSFLGRY,AEAELAKNVSL,AELAKNVSLDNVL	YFV-17D	LLWNGPMAV	peptideci
CASGTGDSNQPQHF	ORF1ab	EBV	CD8	HTTDPSFLGRY	BZLF1	EPLPQGQLTAY	peptideci
CASSPDTGELFF	ORF1ab	CMV	CD8	HTTDPSFLGRY	pp50	VTEHDTLLY	peptideci
CASSPDTGELFF	ORF1ab	Influenza	CD8	HTTDPSFLGRY	NP177	LPRRSGAAGA	peptideci
CASSLTYEQYF	ORF1ab	M.tuberculosis	CD4	HTTDPSFLGRY,ITDVFYKENSY,SEYKGPITDVFY,FLNGSCGSV,FLCLFLLPSL,FLLPSLATV	NA	NA	peptideci peptidecii
CASSPYSNQPQHF	ORF1ab	Neoantigen		HTTDPSFLGRY	GNL3L-R4C	NLNCCSVPV	peptideci
CASSLGQDSYEQYF	ORF1ab	CMV	CD8	HTTDPSFLGRY	pp65	RPHERNGFTVL	peptideci
CASSLRGYEQYF	ORF1ab	Influenza	CD8	HTTDPSFLGRY,FLNGSCGSV,YLDAYNMMI	NP177	LPRRSGAAGA	peptideci
CASSLGNEQFF	ORF1ab	CMV	CD8	HTTDPSFLGRY,AYILFTRFFYV,FVDGVPFVV,RQLLFVVEV,LVLSVNPYV,LLDDFVEII,LLLDDFVEI,YLNTLTLAV	pp65	NLVPMVATV	peptideci
CASSLGEDYEQYF	ORF1ab	Neoantigen		HTTDPSFLGRY	GNL3L-R4C	NLNCCSVPV	peptideci
CASSLRSGVTDTQYF	ORF1ab	M.tuberculosis	CD4	HTTDPSFLGRY	NA	NA	peptideci
CASSPRDSQETQYF	ORF1ab	HIV	CD8	HTTDPSFLGRY	Gag p24	KAFSPEVIPMF	peptideci
CASSLGQNTEAFF	ORF1ab	Celiac disease	CD4	HTTDPSFLGRY	NA	NA	peptideci
CASSLGQNTEAFF	ORF1ab	M.tuberculosis	CD4	HTTDPSFLGRY	NA	NA	peptideci
CASSLGGDTQYF	ORF1ab	M.tuberculosis	CD4	HTTDPSFLGRY,ITDVFYKENSY,SEYKGPITDVFY,AEAELAKNVSL,AELAKNVSLDNVL,VLWAHGFEL	NA	NA	peptideci
CASSSTVSYEQYF	ORF1ab	M.tuberculosis	CD4	HTTDPSFLGRY	NA	NA	peptideci
CASSSRGGTDTQYF	ORF1ab	M.tuberculosis	CD4	HTTDPSFLGRY	NA	NA	peptideci
CASSLGGPYEQYF	ORF1ab	EBV	CD8	HTTDPSFLGRY	BMLF-1	GLCTLVAML	peptideci
CASSDAPNTEAFF	ORF1ab	CMV	CD8	HTTDPSFLGRY	pp65	RPHERNGFTVL	peptideci
CASSEGGYEQYF	ORF1ab	M.tuberculosis	CD4	HTTDPSFLGRY	NA	NA	peptideci
CASSGNTGELFF	ORF1ab	HIV	CD8	HTTDPSFLGRY	Gag	KRWIILGLNK	minigene peptideci
CASSLQGSGANVLTF	ORF1ab	M.tuberculosis	CD4	HTTDPSFLGRY	NA	NA	peptideci
CASSQDQNTEAFF	ORF1ab	Neoantigen		HTTDPSFLGRY,FLPRVFSAV	MRM1	LLFGMTPCL	peptideci
CASSFGGNEQYF	ORF1ab	EBV	CD8	HTTDPSFLGRY,ILHCANFNV	BMLF-1	GLCTLVAML	peptideci
CASSLLGSGETQYF	ORF1ab	Influenza	CD8	HTTDPSFLGRY	NP177	LPRRSGAAGA	peptideci
CASSPGGTEAFF	ORF1ab	Melanoma		HTTDPSFLGRY,FLPRVFSAV,DTDFVNEFYAY,NRDVDTDFVNEFY	Melan-A/MART-1	ELAGIGILTV	peptideci
CASSPGGTEAFF	ORF1ab	M.tuberculosis	CD4	HTTDPSFLGRY,FLPRVFSAV,DTDFVNEFYAY,NRDVDTDFVNEFY	NA	NA	peptideci
CASSLGGSYEQYF	ORF1ab	Influenza	CD8	HTTDPSFLGRY,QLMCQPILL,QLMCQPILLL,KLSYGIATV,VLWAHGFEL,LLDDFVEII,LLLDDFVEI	NP177	LPRRSGAAGA	peptideci
CASSSSYEQYF	ORF1ab	Influenza	CD8	HTTDPSFLGRY,FLNGSCGSV,FLCLFLLPSL,FLLPSLATV	NP177	LPRRSGAAGA	peptideci
CASSLQTGQETQYF	ORF1ab	CMV	CD8	HTTDPSFLGRY	pp65	TPRVTGGGAM	peptideci
CASSPREGRDEQFF	ORF1ab	M.tuberculosis	CD4	HTTDPSFLGRY	NA	NA	peptideci
CASSLDQSTDTQYF	ORF1ab	M.tuberculosis	CD4	HTTDPSFLGRY	NA	NA	peptideci
CASSELAGADTQYF	ORF1ab	M.tuberculosis	CD8	HTTDPSFLGRY	NA	NA	peptideci
CASSLSRNTEAFF	ORF1ab	Influenza	CD8	HTTDPSFLGRY,DTDFVNEFYAY,NRDVDTDFVNEFY,LLDDFVEII,LLLDDFVEI	NP177	LPRRSGAAGA	peptideci
CASSLTGATDTQYF	ORF1ab	Neoantigen		HTTDPSFLGRY,TVLSFCAFA,VLSFCAFAV	KCNB2-LLA	LLAILPYYV	peptideci peptidecii
CASSDRGSTDTQYF	ORF1ab	Influenza	CD8	HTTDPSFLGRY	NP177	LPRRSGAAGA	peptideci
CASSLSENYGYTF	ORF1ab	M.tuberculosis	CD4	HTTDPSFLGRY	NA	NA	peptideci
CASSLSAGQETQYF	ORF1ab	EBV	CD8	HTTDPSFLGRY	BZLF1	RAKFKQLL	peptideci
CASSPGYSNQPQHF	ORF1ab	M.tuberculosis	CD4	HTTDPSFLGRY	NA	NA	peptideci
CASSPGPYEQYF	ORF1ab	Neoantigen		HTTDPSFLGRY	AGL-GLI	QLIPCMDVV	peptideci
CASSPGPYEQYF	ORF1ab	Psoriatic arthritis		HTTDPSFLGRY	NA	NA	peptideci
CSVEDRRTYEQYF	ORF1ab	CMV	CD8	HTTDPSFLGRY	pp65	RPHERNGFTVL	peptideci
CASSSTDSNQPQHF	ORF1ab	M.tuberculosis	CD8	HTTDPSFLGRY	NA	NA	peptideci
CASNQPQHF	ORF1ab	Neoantigen		HTTDPSFLGRY	CMV-MLN	MLNIPSINV	peptideci
CASSLGPYNEQFF	ORF1ab	M.tuberculosis	CD4	HTTDPSFLGRY,FLPRVFSAV	NA	NA	peptideci
CASSLVGNEQFF	ORF1ab	Influenza	CD8	HTTDPSFLGRY,LLDDFVEII,LLLDDFVEI	NP177	LPRRSGAAGA	peptideci
CASSSAASNQPQHF	ORF1ab	Influenza	CD8	HTTDPSFLGRY	Matrix protein (M1)	GILGFVFTL	peptideci
CASSPTSGGYNEQFF	ORF1ab	M.tuberculosis	CD8	HTTDPSFLGRY,KLSYGIATV	NA	NA	peptideci
CASSKGDTEAFF	ORF1ab	Influenza	CD8	HTTDPSFLGRY	NP177	LPRRSGAAGA	peptideci
CASSYSDTYEQYF	ORF1ab	M.tuberculosis	CD8	HTTDPSFLGRY	NA	NA	peptideci
CASRLNTEAFF	ORF1ab	M.tuberculosis	CD4	HTTDPSFLGRY,AEAELAKNVSL,AELAKNVSLDNVL	NA	NA	peptideci
CASSLGSYNEQFF	ORF1ab	Influenza	CD4	HTTDPSFLGRY,QLMCQPILL,QLMCQPILLL,MVMCGGSLYV,VMCGGSLYV,VVYRGTTTY	M1	QARQMVQAMRTIGTHP	peptideci
CASSPRDGQETQYF	ORF1ab	Influenza	CD8	HTTDPSFLGRY	Matrix protein (M1)	GILGFVFTL	peptideci
CASSPGQGNTEAFF	ORF1ab	M.tuberculosis	CD4	YYRARAGEAANF	NA	NA	peptideci
CASSIRSSYEQYF	ORF1ab	Influenza	CD8	YYRARAGEAANF	M,M1,Matrix protein (M1),IV-GIL	GILGFVFTL	peptideci
CASSIRSSYEQYF	ORF1ab	EBV	CD8	YYRARAGEAANF	BMLF1	GLCTLVAML	peptideci
CASSSTSGTDTQYF	ORF1ab	M.tuberculosis	CD4	YYRARAGEAANF	NA	NA	peptideci
CASSVEGSSYNEQFF	ORF1ab	Neoantigen		ITDVFYKENSY,SEYKGPITDVFY	VN1R2-LML-L3F	LMFWASSSI	peptideci
CASSQGQGADTQYF	ORF1ab	M.tuberculosis	CD4	ITDVFYKENSY,SEYKGPITDVFY	NA	NA	peptideci
CASSPGLAGAHEQFF	ORF1ab	Influenza	CD8	ITDVFYKENSY,SEYKGPITDVFY	NP177	LPRRSGAAGA	peptideci
CASSPGLAGAHEQFF	ORF1ab	M.tuberculosis	CD4	ITDVFYKENSY,SEYKGPITDVFY	NA	NA	peptideci
CASSQDSSGANVLTF	ORF1ab	M.tuberculosis	CD4	FADDLNQLTGY	NA	NA	peptideci
CASSFRGGNTEAFF	ORF1ab	M.tuberculosis	CD4	ITEEVGHTDLMAAY	NA	NA	peptideci
CASSSFYTDTQYF	ORF1ab	Influenza	CD8	NSRIKASM	Matrix protein (M1)	GILGFVFTL	peptideci
CASSFAGELFF	ORF1ab	CMV	CD8	AYILFTRFFYV,KLSYGIATV	IE2	NEGVKAAW	peptideci
CASSEYNEQFF	ORF1ab	M.tuberculosis	CD4	AYILFTRFFYV	NA	NA	peptideci
CASSGQGIYNEQFF	ORF1ab	M.tuberculosis	CD4	AYILFTRFFYV	NA	NA	peptideci
CSARDGGEQYF	ORF1ab	HIV	CD8	YIFFASFYY	Gag p24	KRWIILGLNK	peptideci
CASSLGPYEQYF	ORF1ab	Influenza	CD8	YIFFASFYY	NP177	LPRRSGAAGA	peptideci
CASSPGTGELFF	ORF1ab	HIV	CD8	YIFFASFYY,QLMCQPILL,QLMCQPILLL	Gag	KRWIILGLNK	peptideci
CASSPGQGYEQYF	ORF1ab	Neoantigen		YIFFASFYY,FLNGSCGSV	ATP6AP1-KLG-G3W,OR1G1-FLF	KLWASPLHV,FLFMYLVTV	peptideci
CASSSGQGSQPQHF	ORF1ab	M.tuberculosis	CD4	YIFFASFYY	NA	NA	peptideci
CASSPEETQYF	ORF1ab	M.tuberculosis	CD4	YIFFASFYY	CFP10,NA	TAAQAAVVRFQEAAN,NA	peptideci
CASSYTGELFF	ORF1ab	Influenza	CD8	QLMCQPILL,QLMCQPILLL	NP177	LPRRSGAAGA	peptideci
CASSYTGELFF	ORF1ab	HCV	CD8	QLMCQPILL,QLMCQPILLL	NS3	KLVALGINAV	peptideci
CASSLSGTGELFF	ORF1ab	HCV	CD8	QLMCQPILL,QLMCQPILLL	NS3	CINGVCWTV	peptideci
CASSFGLAYEQYF	ORF1ab	M.tuberculosis	CD4	QLMCQPILL,QLMCQPILLL	NA	NA	peptideci
CASSLGLNSPLHF	ORF1ab	M.tuberculosis	CD4	QLMCQPILL,QLMCQPILLL	NA	NA	peptideci
CASSLGRASYEQYF	ORF1ab	M.tuberculosis	CD4	QLMCQPILL,QLMCQPILLL	NA	NA	peptideci
CASSRDSSSYNEQFF	ORF1ab	M.tuberculosis	CD4	QLMCQPILL,QLMCQPILLL,LLDDFVEII,LLLDDFVEI	NA	NA	peptideci
CASSLGSSYEQYF	ORF1ab	Melanoma		QLMCQPILL,QLMCQPILLL,KLSYGIATV,TLIGDCATV	gp100	YLEPGPVTA	peptideci
CASSLGSSYEQYF	ORF1ab	M.tuberculosis	CD4	QLMCQPILL,QLMCQPILLL,KLSYGIATV,TLIGDCATV	NA	NA	peptideci
CASSLSGSYEQYF	ORF1ab	CMV	CD8	QLMCQPILL,QLMCQPILLL,FLPRVFSAV,KLSYGIATV	pp50	VTEHDTLLY	peptideci
CASSLSGSYEQYF	ORF1ab	Influenza	CD8	QLMCQPILL,QLMCQPILLL,FLPRVFSAV,KLSYGIATV	NP177	LPRRSGAAGA	peptideci
CASSLYYNEQFF	ORF1ab	M.tuberculosis	CD4	QLMCQPILL,QLMCQPILLL	NA	NA	peptideci
CASSLGPSTDTQYF	ORF1ab	M.tuberculosis	CD4	QLMCQPILL,QLMCQPILLL	NA	NA	peptideci
CASSLGRYEQYF	ORF1ab	Psoriatic arthritis		QLMCQPILL,QLMCQPILLL,FLNGSCGSV	NA	NA	peptideci
CASSLGQGYEQYF	ORF1ab	DENV	CD8	QLMCQPILL,QLMCQPILLL,FLNGSCGSV			peptideci
CASSLSLSYEQYF	ORF1ab	M.tuberculosis	CD4	QLMCQPILL,QLMCQPILLL	NA	NA	peptideci
CASSLAGSYEQYF	ORF1ab	Influenza	CD8	QLMCQPILL,QLMCQPILLL,FLNGSCGSV,VLAWLYAAV,KLSYGIATV,TLIGDCATV	NP177	LPRRSGAAGA	peptideci
CASSLAGNNEQFF	ORF1ab	M.tuberculosis	CD4	QLMCQPILL,QLMCQPILLL	NA	NA	peptideci
CASSLAGTDTQYF	ORF1ab	CMV	CD8	QLMCQPILL,QLMCQPILLL,RQLLFVVEV	pp65	TPRVTGGGAM	peptideci
CASSLAGTDTQYF	ORF1ab	M.tuberculosis	CD4	QLMCQPILL,QLMCQPILLL,RQLLFVVEV	NA	NA	peptideci
CASSLAGGTDTQYF	ORF1ab	M.tuberculosis	CD8	QLMCQPILL,QLMCQPILLL	NA	NA	peptideci
CASSLDRGNQPQHF	ORF1ab	M.tuberculosis	CD4	QLMCQPILL,QLMCQPILLL	NA	NA	peptideci
CASSLDRGGGYTF	ORF1ab	M.tuberculosis	CD4	QLMCQPILL,QLMCQPILLL	NA	NA	peptideci
CASSLASTDTQYF	ORF1ab	Influenza	CD8	QLMCQPILL,QLMCQPILLL,FLNGSCGSV	NP177	LPRRSGAAGA	peptideci
CASSLAGSSYEQYF	ORF1ab	M.tuberculosis	CD4	QLMCQPILL,QLMCQPILLL,FVDGVPFVV,VVYRGTTTY,LLDDFVEII,LLLDDFVEI	NA	NA	peptideci
CASSLSQGNEQFF	ORF1ab	M.tuberculosis	CD4	QLMCQPILL,QLMCQPILLL	NA	NA	peptideci
CASSFGSSYEQYF	ORF1ab	M.tuberculosis	CD4	QLMCQPILL,QLMCQPILLL,FVDGVPFVV,KLSYGIATV,VLWAHGFEL	NA	NA	peptideci
CASSLGTGELFF	ORF1ab	CMV	CD8	QLMCQPILL,QLMCQPILLL	pp65	NLVPMVATV	peptideci peptidecii
CASSLGSGKYEQYF	ORF1ab	M.tuberculosis	CD4	QLMCQPILL,QLMCQPILLL	NA	NA	peptideci
CASSLGGNTEAFF	ORF1ab	Celiac disease	CD4	QLMCQPILL,QLMCQPILLL,FLNGSCGSV,FVDGVPFVV,KLSYGIATV,APAHISTI,LIVNSVLLFL,LLFLAFVVFL,SVLLFLAFV	NA	NA	peptideci
CASSFGTGELFF	ORF1ab	Influenza	CD8	QLMCQPILL,QLMCQPILLL,ILHCANFNV	NP177	LPRRSGAAGA	peptideci
CASSLSITDTQYF	ORF1ab	M.tuberculosis	CD4	QLMCQPILL,QLMCQPILLL	NA	NA	peptideci
CASSLGASYGYTF	ORF1ab	M.tuberculosis	CD4	QLMCQPILL,QLMCQPILLL	NA	NA	peptideci
CASSLGGGSYEQYF	ORF1ab	Influenza	CD8	QLMCQPILL,QLMCQPILLL	NP177	LPRRSGAAGA	peptideci peptidecii
CASSLGGGSYEQYF	ORF1ab	Celiac disease	CD4	QLMCQPILL,QLMCQPILLL	NA	NA	peptideci peptidecii
CASSLGGGSYEQYF	ORF1ab	CMV	CD8	QLMCQPILL,QLMCQPILLL	pp65	NLVPMVATV	peptideci peptidecii
CASSLAPGYEQYF	ORF1ab	Influenza	CD8	QLMCQPILL,QLMCQPILLL	NP177	LPRRSGAAGA	peptideci
CASSLGRGYEQYF	ORF1ab	M.tuberculosis	CD4	QLMCQPILL,QLMCQPILLL,AEIPKEEVKPF,ASKIITLKK,SASKIITLK	NA	NA	peptideci
CASSLAGTGELFF	ORF1ab	M.tuberculosis	CD4	QLMCQPILL,QLMCQPILLL,IVDTVSALV	NA	NA	peptideci
CASSFGATDTQYF	ORF1ab	EBV	CD8	QLMCQPILL,QLMCQPILLL	BMLF-1	GLCTLVAML	peptideci
CASSLASTGELFF	ORF1ab	CMV	CD8	QLMCQPILL,QLMCQPILLL	pp50	VTEHDTLLY	peptideci
CASSFGGNTEAFF	ORF1ab	CMV	CD8	QLMCQPILL,QLMCQPILLL	pp65	RPHERNGFTVL	peptideci
CASSFGGNTEAFF	ORF1ab	Psoriatic arthritis		QLMCQPILL,QLMCQPILLL	NA	NA	peptideci
CASSSGPADTQYF	ORF1ab	Melanoma	CD8	QLMCQPILL,QLMCQPILLL	NA	NA	peptideci
CASSLGQNNEQFF	ORF1ab	M.tuberculosis	CD4	QLMCQPILL,QLMCQPILLL	NA	NA	peptideci
CASSYSNTGELFF	ORF1ab	M.tuberculosis	CD4	QLMCQPILL,QLMCQPILLL	NA	NA	peptideci
CASSLGTAYEQYF	ORF1ab	M.tuberculosis	CD4	QLMCQPILL,QLMCQPILLL,FPPTSFGPL,VLWAHGFEL	NA	NA	peptideci
CASSDGSTDTQYF	ORF1ab	M.tuberculosis	CD4	AEAELAKNVSL,AELAKNVSLDNVL	NA	NA	peptideci
CASSMTGGADTQYF	ORF1ab	M.tuberculosis	CD4	AEAELAKNVSL,AELAKNVSLDNVL	NA	NA	peptideci
CASSSGGTEAFF	ORF1ab	CMV	CD8	AEAELAKNVSL,AELAKNVSLDNVL,FLNGSCGSV,FVDGVPFVV	pp65	NLVPMVATV	peptideci
CASSSDGTYEQYF	ORF1ab	M.tuberculosis	CD4	AEAELAKNVSL,AELAKNVSLDNVL	NA	NA	peptideci
CASSPGGDEQFF	ORF1ab	M.tuberculosis	CD4	AEAELAKNVSL,AELAKNVSLDNVL	NA	NA	peptideci
CASSLANTEAFF	ORF1ab	M.tuberculosis	CD4	AEAELAKNVSL,AELAKNVSLDNVL,FLNGSCGSV,DTDFVNEFYAY,NRDVDTDFVNEFY	NA	NA	peptideci
CASSPGGDTQYF	ORF1ab	M.tuberculosis	CD4	AEAELAKNVSL,AELAKNVSLDNVL	NA	NA	peptideci
CASSYSSGANVLTF	ORF1ab	M.tuberculosis	CD4	AEAELAKNVSL,AELAKNVSLDNVL	NA	NA	peptideci
CASSQDYNEQFF	ORF1ab	Influenza	CD8	AEAELAKNVSL,AELAKNVSLDNVL	NP177	LPRRSGAAGA	peptideci
CASSQDYNEQFF	ORF1ab	Diabetes Type 1	CD4	AEAELAKNVSL,AELAKNVSLDNVL	NA	NA	peptideci
CASSQSTGELFF	ORF1ab	HIV	CD8	AEAELAKNVSL,AELAKNVSLDNVL	Gag	KRWIILGLNK	peptideci
CASSLNSNQPQHF	ORF1ab	M.tuberculosis	CD4	AEAELAKNVSL,AELAKNVSLDNVL,FVDGVPFVV	NA	NA	peptideci
CASSQTGSTDTQYF	ORF1ab	Influenza	CD8	AEAELAKNVSL,AELAKNVSLDNVL	Matrix protein (M1)	GILGFVFTL	peptideci
CASSQTGSTDTQYF	ORF1ab	M.tuberculosis	CD4	AEAELAKNVSL,AELAKNVSLDNVL	NA	NA	peptideci
CASSLGQGDQPQHF	ORF1ab	Melanoma	CD8	AEAELAKNVSL,AELAKNVSLDNVL	Melan-A/MART-1	EAAGIGILTV	peptideci
CASSYSSGYGYTF	ORF1ab	Neoantigen		AEAELAKNVSL,AELAKNVSLDNVL	SEC24A	FLYNPLTRV	peptideci
CASSSTLEQYF	ORF1ab	M.tuberculosis	CD4	AEAELAKNVSL,AELAKNVSLDNVL	NA	NA	peptideci
CASSWTGNTEAFF	ORF1ab	Neoantigen		AEAELAKNVSL,AELAKNVSLDNVL	FNDC3B	VVLSWAPPV	peptideci
CASSRTGGADTQYF	ORF1ab	M.tuberculosis	CD8	AEAELAKNVSL,AELAKNVSLDNVL	NA	NA	peptideci
CASSLEETQYF	ORF1ab	Celiac disease	CD4	AEAELAKNVSL,AELAKNVSLDNVL	NA	NA	peptideci
CASSLEETQYF	ORF1ab	Inflammatory bowel disease (IBD)	CD4	AEAELAKNVSL,AELAKNVSLDNVL	Flagellin	NA	peptideci
CASSLEETQYF	ORF1ab	M.tuberculosis	CD4	AEAELAKNVSL,AELAKNVSLDNVL	CFP10	TAAQAAVVRFQEAAN	peptideci
CASSPQGTGELFF	ORF1ab	M.tuberculosis	CD4	FLPRVFSAV	NA	NA	peptideci
CASSLGGTYEQYF	ORF1ab	EBV	CD8	FLPRVFSAV,FLCLFLLPSL,FLLPSLATV	BMLF-1	GLCTLVAML	peptideci
CASSPTENTEAFF	ORF1ab	M.tuberculosis	CD4	FLPRVFSAV	NA	NA	peptideci
CASSVSGNTEAFF	ORF1ab	M.tuberculosis	CD4	FLPRVFSAV	NA	NA	peptideci
CASSLGGTGELFF	ORF1ab	Celiac disease	CD4	FLPRVFSAV,FLNGSCGSV,KLSYGIATV,VVYRGTTTY,IPRRNVATL	NA	NA	peptideci
CASSPRTDTQYF	ORF1ab	M.tuberculosis	CD4	FLPRVFSAV,LLDDFVEII,LLLDDFVEI	NA	NA	peptideci
CASSLGPDSNQPQHF	ORF1ab	M.tuberculosis	CD4	FLPRVFSAV	NA	NA	peptideci
CASSLQGQETQYF	ORF1ab	M.tuberculosis	CD4	FLPRVFSAV	NA	NA	peptideci
CASSEGTSGTDTQYF	ORF1ab	M.tuberculosis	CD8	FLPRVFSAV	NA	NA	peptideci
CASSPSTDTQYF	ORF1ab	M.tuberculosis	CD4	FLPRVFSAV,LLDDFVEII,LLLDDFVEI	NA	NA	peptideci minigene
CASSLDPGAYNEQFF	ORF1ab	Influenza	CD8	FLPRVFSAV	NP177	LPRRSGAAGA	peptideci
CASSLSGSSYNEQFF	ORF1ab	M.tuberculosis	CD4	FLPRVFSAV	NA	NA	peptideci
CASSLGNYEQYF	ORF1ab	CMV	CD8	FLPRVFSAV	IE1	VLEETSVML	peptideci
CASSLASGNEQFF	ORF1ab	Neoantigen		FLPRVFSAV	TTLL12-KLP	KLPLDINPV	peptideci
CASSLVGSYEQYF	ORF1ab	Influenza	CD8	FLPRVFSAV,FLNGSCGSV	NP177	LPRRSGAAGA	peptideci
CASSPGTGSYEQYF	ORF1ab	EBV	CD8	FLPRVFSAV	BZLF1,BZLF-1	RAKFKQLL	peptideci
CASSPGTGSYEQYF	ORF1ab	Influenza	CD8	FLPRVFSAV	NP177	LPRRSGAAGA	peptideci
CASSRSSYEQYF	ORF1ab	Diabetes Type 1	CD4	FLPRVFSAV	NA	NA	peptideci
CASSRSSYEQYF	ORF1ab	M.tuberculosis	CD4	FLPRVFSAV	NA	NA	peptideci
CASSLSTGNYGYTF	ORF1ab	M.tuberculosis	CD4	FLPRVFSAV	NA	NA	peptideci
CASSPLDSSYEQYF	ORF1ab	M.tuberculosis	CD4	FLPRVFSAV	NA	NA	peptideci
CASSLQGSGTEAFF	ORF1ab	M.tuberculosis	CD4	FLPRVFSAV	NA	NA	peptideci
CASSLLSGANVLTF	ORF1ab	M.tuberculosis	CD4	FLPRVFSAV,FLNGSCGSV	NA	NA	peptideci
CASSQGGGGTDTQYF	ORF1ab	Neoantigen		FLPRVFSAV	GANAB	ALYGSVPVL	peptideci
CASSQGGGGTDTQYF	ORF1ab	M.tuberculosis	CD4	FLPRVFSAV	NA	NA	peptideci
CASSPTSGSTDTQYF	ORF1ab	M.tuberculosis	CD4	FLPRVFSAV	NA	NA	peptideci
CASSVQGAGETQYF	ORF1ab	M.tuberculosis	CD4	FLPRVFSAV	NA	NA	peptideci
CASSLGTDTQYF	ORF1ab	Celiac disease	CD4	FLPRVFSAV,APAHISTI,LIVNSVLLFL,LLFLAFVVFL,SVLLFLAFV	NA	NA	peptideci
CASSLAGGQETQYF	ORF1ab	HIV	CD8	FLPRVFSAV	Gag,Gag p24	KAFSPEVIPMF	peptideci
CASSFGADTQYF	ORF1ab	HCV	CD8	FLPRVFSAV	NS3	KLVALGINAV	peptideci
CASSLRGNTEAFF	ORF1ab	Celiac disease	CD4	FLPRVFSAV	NA	NA	peptideci
CASSLRGNTEAFF	ORF1ab	M.tuberculosis	CD4	FLPRVFSAV	NA	NA	peptideci
CASSGGDTGELFF	ORF1ab	M.tuberculosis	CD8	FLLNKEMYL	NA	NA	peptideci
CASSQDRVGNEQFF	ORF1ab	M.tuberculosis	CD4	FLNGSCGSV	NA	NA	peptideci
CASSLGAGGTDTQYF	ORF1ab	Influenza	CD8	FLNGSCGSV	NP177	LPRRSGAAGA	peptideci
CASSQGYEQYF	ORF1ab	Neoantigen		FLNGSCGSV,VLAWLYAAV,RQLLFVVEV,LLDDFVEII,LLLDDFVEI	PLXNB1-VLF	VLFAAFSSA	peptideci peptidecii
CASSQGYEQYF	ORF1ab	M.tuberculosis	CD8	FLNGSCGSV,VLAWLYAAV,RQLLFVVEV,LLDDFVEII,LLLDDFVEI	NA	NA	peptideci peptidecii
CSVGRDGTNEKLFF	ORF1ab	EBV	CD8	FLNGSCGSV	BMLF-1	GLCTLVAML	peptideci
CASSGSYEQYF	ORF1ab	Influenza	CD8	FLNGSCGSV	NP177	LPRRSGAAGA	peptideci
CASSFGGTEAFF	ORF1ab	Influenza	CD8	FLNGSCGSV	NP177	LPRRSGAAGA	peptideci
CAISESYEQYF	ORF1ab	CMV	CD8	FLNGSCGSV	pp65	NLVPMVATV,RPHERNGFTVL	peptideci
CASSQDPGYEQYF	ORF1ab	Influenza	CD8	FLNGSCGSV	M,Matrix protein (M1)	GILGFVFTL	peptideci
CASSYGGGYEQYF	ORF1ab	Neoantigen		FLNGSCGSV	GNL3L-R4C	NLNCCSVPV	peptideci
CASSYGGGYEQYF	ORF1ab	YFV		FLNGSCGSV	YFV-LLW	LLWNGPMAV	peptideci
CASSYGGYEQYF	ORF1ab	Influenza	CD8	FLNGSCGSV	Matrix protein (M1)	GILGFVFTL	peptideci
CASSLLTGTDTQYF	ORF1ab	M.tuberculosis	CD4	FLNGSCGSV	NA	NA	peptideci
CASSQDSYEQYF	ORF1ab	CMV	CD8	FLNGSCGSV	pp65	RPHERNGFTVL	peptideci
CASSDSYEQYF	ORF1ab	YFV		FLNGSCGSV	YFV-LLW	LLWNGPMAV	peptideci
CASSDSYEQYF	ORF1ab	Melanoma		FLNGSCGSV	Melan-A/MART-1	ELAGIGILTV	peptideci
CASSDSYEQYF	ORF1ab	M.tuberculosis	CD8	FLNGSCGSV	NA	NA	peptideci
CASSFSYEQYF	ORF1ab	Celiac disease	CD4	FLNGSCGSV	NA	NA	peptideci
CASSFSYEQYF	ORF1ab	M.tuberculosis	CD4	FLNGSCGSV	NA	NA	peptideci
CASSSRTGGTDTQYF	ORF1ab	Influenza	CD4	FLNGSCGSV	NP	DPFRLLQNSQVFS	peptideci
CASSLSGQETQYF	ORF1ab	M.tuberculosis	CD4	FLNGSCGSV	NA	NA	peptideci
CASSISYEQYF	ORF1ab	HIV	CD8	FLNGSCGSV	Gag	KAFSPEVIPMF	peptideci
CASSLSWGYEQYF	ORF1ab	Influenza	CD8	FLNGSCGSV	Matrix protein (M1)	GILGFVFTL	peptideci
CASSYGSYEQYF	ORF1ab	HCV	CD8	FLNGSCGSV	NS3	KLVALGINAV	peptideci
CASSFGGYEQYF	ORF1ab	HCV		FLNGSCGSV,ILHCANFNV,FVDGVPFVV	HCV-KLV	KLVALGINAV	peptideci
CASSLASGGATDTQYF	ORF1ab	M.tuberculosis	CD4	FLNGSCGSV	NA	NA	peptideci
CASSEGAGANVLTF	ORF1ab	M.tuberculosis	CD4	FLNGSCGSV	NA	NA	peptideci
CASSLAGGGYEQYF	ORF1ab	Influenza	CD8	FLNGSCGSV	NP177	LPRRSGAAGA	peptideci
CASTLGYEQYF	ORF1ab	Allergy		FLNGSCGSV	NA	NA	peptideci
CASSLTGNYGYTF	ORF1ab	M.tuberculosis	CD4	FLNGSCGSV,KLSYGIATV	NA	NA	peptideci peptidecii
CASSLDPYEQYF	ORF1ab	Influenza	CD8	FLNGSCGSV	NP177	LPRRSGAAGA	peptideci
CASSLAGYEQYF	ORF1ab	CMV	CD8	FLNGSCGSV	pp65	NLVPMVATV	peptideci
CASSPTGGNTGELFF	ORF1ab	CMV	CD8	FLNGSCGSV	pp50	VTEHDTLLY	peptideci
CASSPTGGNTGELFF	ORF1ab	Influenza	CD8	FLNGSCGSV	NP177	LPRRSGAAGA	peptideci
CASSLGGTEAFF	ORF1ab	Influenza	CD8	FLNGSCGSV,TTLPVNVAF	NP177	LPRRSGAAGA	peptideci
CASSLGGTEAFF	ORF1ab	Celiac disease	CD4	FLNGSCGSV,TTLPVNVAF	NA	NA	peptideci
CASSLGGTEAFF	ORF1ab	Neoantigen		FLNGSCGSV,TTLPVNVAF	OR5M3-KMV	KMVAVFYTT	peptideci
CASSVGGYNEQFF	ORF1ab	M.tuberculosis	CD4	FLNGSCGSV,VLWAHGFEL	NA	NA	peptideci
CASSSSGGSTDTQYF	ORF1ab	M.tuberculosis	CD4	FLNGSCGSV,VLQAVGACV	NA	NA	peptideci
CASSAGGTEAFF	ORF1ab	Neoantigen		FLNGSCGSV	OR5M3-KMV	KMVAVFYTT	peptideci
CASSYSYEQYF	ORF1ab	Melanoma	CD8	FLNGSCGSV	NA	NA	peptideci peptidecii
CASSLAGNYGYTF	ORF1ab	Influenza	CD8	FLNGSCGSV	Matrix protein (M1)	GILGFVFTL	peptideci
CASSSRSQETQYF	ORF1ab	M.tuberculosis	CD4	FLNGSCGSV	NA	NA	peptideci
CASSMVGGSYNEQFF	ORF1ab	Influenza	CD8	FLNGSCGSV	M,Matrix protein (M1)	GILGFVFTL	peptideci
CASSLSYEQYF	ORF1ab	Influenza	CD8	FLNGSCGSV,MPASWVMRI	NP177	LPRRSGAAGA	peptideci peptidecii
CASSLSYEQYF	ORF1ab	Neoantigen		FLNGSCGSV,MPASWVMRI	PIGN-FLT-P7H	FLTVFSHFM	peptideci peptidecii
CASSLSYEQYF	ORF1ab	M.tuberculosis	CD4	FLNGSCGSV,MPASWVMRI	NA	NA	peptideci peptidecii
CASSQDRGSYEQYF	ORF1ab	M.tuberculosis	CD4	FLNGSCGSV	NA	NA	peptideci
CASSLAGGGTDTQYF	ORF1ab	M.tuberculosis	CD4	FLNGSCGSV,TLIGDCATV	NA	NA	peptideci
CASSPTGTSTDTQYF	ORF1ab	M.tuberculosis	CD4	FLNGSCGSV	NA	NA	peptideci
CASSDSGYGYTF	ORF1ab	M.tuberculosis	CD4	FLNGSCGSV	NA	NA	peptideci
CASSLGNTEAFF	ORF1ab	Neoantigen		FLNGSCGSV,FVDGVPFVV	SEC24A	FLYNPLTRV	peptideci
CASSLGNTEAFF	ORF1ab	EBV	CD8	FLNGSCGSV,FVDGVPFVV	BMLF1	GLCTLVAML	peptideci
CASSDGSGGTDTQYF	ORF1ab	M.tuberculosis	CD8	FLNGSCGSV	NA	NA	peptideci
CASSLGQGAYEQYF	ORF1ab	DENV	CD8	FLNGSCGSV			peptideci
CASSQDEGYEQYF	ORF1ab	Neoantigen		FLNGSCGSV	SEC24A-FLY-P5L	FLYNLLTRV	peptideci
CASSLGLEAFF	ORF1ab	CMV	CD8	FLNGSCGSV	UL29/28	FRCPRRFCF	peptideci
CASSSGYNEQFF	ORF1ab	Neoantigen		FLNGSCGSV	COL18A1-VLL-S8F	VLLGVKLFGV	peptideci
CASSSGYNEQFF	ORF1ab	M.tuberculosis	CD4	FLNGSCGSV	NA	NA	peptideci
CASSLGDEQFF	ORF1ab	M.tuberculosis	CD4	FLNGSCGSV,VVYRGTTTY,YLNTLTLAV	NA	NA	peptideci
CASSLGDTQYF	ORF1ab	Celiac disease	CD4	FLNGSCGSV,VLWAHGFEL	NA	NA	peptideci peptidecii
CASSPQETQYF	ORF1ab	Inflammatory bowel disease (IBD)	CD4	FLNGSCGSV	Flagellin	NA	peptideci
CASRDYEQYF	ORF1ab	HIV	CD8	FLNGSCGSV	Gag	GPGHKARVL	peptideci
CASSFRTYEQYF	ORF1ab	M.tuberculosis	CD4	FLNGSCGSV	NA	NA	peptideci
CASSSTGAGTDTQYF	ORF1ab	EBV	CD8	FLNGSCGSV	BMLF-1	GLCTLVAML	peptideci
CASSSGQGYEQYF	ORF1ab	Influenza	CD8	FLNGSCGSV	NP177	LPRRSGAAGA	peptideci
CSVGQGGTNEKLFF	ORF1ab	EBV	CD8	FLNGSCGSV	BMLF1,ND,BMLF-1	GLCTLVAML	peptideci
CASSETSGGTDTQYF	ORF1ab	M.tuberculosis	CD8	FLNGSCGSV	NA	NA	peptideci
CASSLVGTEAFF	ORF1ab	CMV	CD8	FLNGSCGSV,FVDGVPFVV	IE-1	CRVLCCYVL	peptideci
CASSYGQGYEQYF	ORF1ab	Neoantigen		FLNGSCGSV,KLSYGIATV	GNL3L-R4C	NLNCCSVPV	peptideci
CASSSTSGSYEQYF	ORF1ab	Influenza	CD8	FLNGSCGSV	NP177	LPRRSGAAGA	peptideci
CASSLLAGIYNEQFF	ORF1ab	M.tuberculosis	CD4	FLNGSCGSV	NA	NA	peptideci
CASSFGTGGYEQYF	ORF1ab	Neoantigen	CD8	FLNGSCGSV,FVDGVPFVV	FAM58A-3	IAMAVLYLA	peptideci
CASSFGQGEGYEQYF	ORF1ab	EBV	CD8	FLNGSCGSV	BZLF1	RAKFKQLL	peptideci
CASSAYNEQFF	ORF1ab	YFV	CD8	FLNGSCGSV,YLNTLTLAV	YFV-17D	LLWNGPMAV	peptideci
CASSLTGADTQYF	ORF1ab	M.tuberculosis	CD4	FLNGSCGSV	NA	NA	peptideci
CASSEQGYEQYF	ORF1ab	M.tuberculosis	CD4	FLNGSCGSV	NA	NA	peptideci
CASSLVAGLNTEAFF	ORF1ab	M.tuberculosis	CD4	FLNGSCGSV	NA	NA	peptideci
CASSLAGTYEQYF	ORF1ab	Influenza	CD8	FLNGSCGSV,KLSYGIATV	NP177	LPRRSGAAGA	peptideci
CASSSTYEQYF	ORF1ab	Influenza	CD8	FLNGSCGSV	NP177	LPRRSGAAGA	peptideci peptidecii
CASSLGSYEQYF	ORF1ab	DENV	CD8	FLNGSCGSV			peptideci
CASSLAAGGDEQYF	ORF1ab	HIV	CD8	FLNGSCGSV	Gag	FLGKIWPSHK	peptideci
CASSLGPNTGELFF	ORF1ab	CMV	CD8	FLNGSCGSV	pp65	NLVPMVATV	peptideci
CASSIVSQETQYF	ORF1ab	Influenza	CD8	VLAWLYAAV	M	GILGFVFTL	peptideci
CASSSRGAYEQYF	ORF1ab	M.tuberculosis	CD4	VLAWLYAAV	NA	NA	peptideci
CASSYGVNTEAFF	ORF1ab	Neoantigen		VLAWLYAAV	OR14C36-FML-V6L	FMLYLLTLM	peptideci
CASSLQGSYEQYF	ORF1ab	Neoantigen		VLAWLYAAV	FNDC3B-L3M	VVMSWAPPV	peptideci
CASSEGNEQFF	ORF1ab	M.tuberculosis	CD4	FLNRFTTTL	NA	NA	peptideci
CASSPGTDIYEQYF	ORF1ab	Influenza	CD8	FLNRFTTTL	Matrix protein (M1)	GILGFVFTL	peptideci
CASSLESGSSYNEQFF	ORF1ab	HIV	CD8	FLNRFTTTL	Gag	GPGHKARVL	peptideci
CASSPPRSYEQYF	ORF1ab	Influenza	CD8	FLCLFLLPSL,FLLPSLATV	NP177	LPRRSGAAGA	peptideci
CASSLTVYNEQFF	ORF1ab	Neoantigen		FLCLFLLPSL,FLLPSLATV	PIGN-FLT-P7H	FLTVFSHFM	peptideci
CASSQEASGGYNEQFF	ORF1ab	M.tuberculosis	CD8	FLCLFLLPSL,FLLPSLATV	NA	NA	peptideci
CASSFGPNTGELFF	ORF1ab	M.tuberculosis	CD4	FLCLFLLPSL,FLLPSLATV,VLWAHGFEL	NA	NA	peptideci
CASSSGTPNEQFF	ORF1ab	M.tuberculosis	CD8	FLCLFLLPSL,FLLPSLATV	NA	NA	peptideci
CASSLNTGELFF	ORF1ab	M.tuberculosis	CD4	FLCLFLLPSL,FLLPSLATV,MPASWVMRI	NA	NA	peptideci peptidecii
CASSLEGQASSYEQYF	ORF1ab	Melanoma	CD8	FLCLFLLPSL,FLLPSLATV	Melan-A/MART-1	EAAGIGILTV	peptideci
CASSLEGQASSYEQYF	ORF1ab	Influenza	CD8	FLCLFLLPSL,FLLPSLATV	NP177	LPRRSGAAGA	peptideci
CASSFRGKGTEAFF	ORF1ab	M.tuberculosis	CD4	FLCLFLLPSL,FLLPSLATV	NA	NA	peptideci
CASSLTGSQPQHF	ORF1ab	M.tuberculosis	CD4	FLCLFLLPSL,FLLPSLATV	NA	NA	peptideci
CASSPGLAGTDTQYF	ORF1ab	M.tuberculosis	CD8	MPASWVMRI	NA	NA	peptideci
CASSLGRSSYEQYF	ORF1ab	Neoantigen		MPASWVMRI	OR14C36-FML-V6L	FMLYLLTLM	peptideci
CASSESGGELFF	ORF1ab	M.tuberculosis	CD4	MPASWVMRI	NA	NA	peptideci
CASSKSSYEQYF	ORF1ab	Influenza	CD8	MPASWVMRI	Matrix protein (M1)	GILGFVFTL	peptideci
CASSLGYGYTF	ORF1ab	HIV	CD8	GVYDYLVST,TLGVYDYLV	Gag,Gag polyprotein	QASQEVKNW	peptideci
CASSDGDTGELFF	ORF1ab	M.tuberculosis	CD8	KLWAQCVQL	NA	NA	peptideci
CASSLGYNEQFF	ORF1ab	M.tuberculosis	CD4	KLWAQCVQL,FVDGVPFVV	NA	NA	peptideci
CASSVRDTGELFF	ORF1ab	M.tuberculosis	CD4	KLWAQCVQL	NA	NA	peptideci
CASSEGGYTEAFF	ORF1ab	Neoantigen		FTYASALWEI	GNL3L-R4C	NLNCCSVPV	peptideci
CASSLAGGETQYF	ORF1ab	Influenza	CD8	SEISMDNSPNL	NP177	LPRRSGAAGA	peptideci
CASRIQETQYF	ORF1ab	Influenza	CD8	SEISMDNSPNL	NP177	LPRRSGAAGA	peptideci
CASSTGSSYEQYF	ORF1ab	Influenza	CD8	SEISMDNSPNL	NP177	LPRRSGAAGA	peptideci
CASSSGTANEKLFF	ORF1ab	M.tuberculosis	CD4	ALRANSAVK	NA	NA	peptideci
CASRPQGSYEQYF	ORF1ab	Influenza	CD8	TVLSFCAFA,VLSFCAFAV	NP177	LPRRSGAAGA	peptideci
CASSLLQPSTDTQYF	ORF1ab	M.tuberculosis	CD4	TVLSFCAFA,VLSFCAFAV	NA	NA	peptideci
CASSLTGGDTEAFF	ORF1ab	Influenza	CD8	TMADLVYAL,YTMADLVYA	NP177	LPRRSGAAGA	peptideci
CASSPGGYNEQFF	ORF1ab	M.tuberculosis	CD4	TMADLVYAL,YTMADLVYA,YLNTLTLAV	NA	NA	peptideci
CASSLAGGSYNEQFF	ORF1ab	M.tuberculosis	CD4	LLMPILTLT,KLSYGIATV,LLDDFVEII,LLLDDFVEI	NA	NA	peptideci
CASSFTSGTYEQYF	ORF1ab	M.tuberculosis	CD4	LLMPILTLT	NA	NA	peptideci
CASSPRTSGTDTQYF	ORF1ab	HIV	CD4 CD8	ILHCANFNV	Gag polyprotein RQ13	RFYKTLRAEQASQ	peptideci
CASSFSTDTQYF	ORF1ab	M.tuberculosis	CD4	ILHCANFNV	NA	NA	peptideci
CASSFSTDTQYF	ORF1ab	EBV	CD8	ILHCANFNV	BMLF1	GLCTLVAML	peptideci
CASSTGTSGETQYF	ORF1ab	Influenza	CD8	ILHCANFNV	NP177	LPRRSGAAGA	peptideci
CASSLSSGSSYEQYF	ORF1ab	M.tuberculosis	CD4	FPPTSFGPL	NA	NA	peptideci
CASSSSGANVLTF	ORF1ab	M.tuberculosis	CD4	FPPTSFGPL,VLWAHGFEL	NA	NA	peptideci
CASSLSGQGYGYTF	ORF1ab	M.tuberculosis	CD4	FPPTSFGPL	NA	NA	peptideci
CASSFPDTQYF	ORF1ab	CMV	CD8	FPPTSFGPL	IE-1	CRVLCCYVL	peptideci
CASSFGDTQYF	ORF1ab	CMV	CD8	FPPTSFGPL,GVAMPNLYK,YLNTLTLAV	IE-1	CRVLCCYVL	peptideci
CASSLSSYNEQFF	ORF1ab	Influenza	CD8	FPPTSFGPL,APAHISTI,LIVNSVLLFL,LLFLAFVVFL,SVLLFLAFV	Matrix protein (M1)	GILGFVFTL	peptideci
CASSPGGETQYF	ORF1ab	M.tuberculosis	CD4	FPPTSFGPL	NA	NA	peptideci
CASSLSGMNTEAFF	ORF1ab	M.tuberculosis	CD4	FPPTSFGPL	NA	NA	peptideci
CASSWGGETEAFF	ORF1ab	M.tuberculosis	CD4	FPPTSFGPL	NA	NA	peptideci
CASSYGLNTEAFF	ORF1ab	Influenza	CD8	FVDGVPFVV	Matrix protein (M1)	GILGFVFTL	peptideci
CASSYGLNTEAFF	ORF1ab	HIV	CD8	FVDGVPFVV	Nef	FLKEKGGL	peptideci
CASSEAGDNSPLHF	ORF1ab	M.tuberculosis	CD4	FVDGVPFVV	NA	NA	peptideci
CASSGGSSYEQYF	ORF1ab	M.tuberculosis	CD4	FVDGVPFVV	NA	NA	peptideci
CASSLSNTGELFF	ORF1ab	M.tuberculosis	CD4	FVDGVPFVV	NA	NA	peptideci
CASRTGLHTDTQYF	ORF1ab	M.tuberculosis	CD4	FVDGVPFVV	NA	NA	peptideci
CASSLTGSEQYF	ORF1ab	Neoantigen		FVDGVPFVV	MRM1-T6P	LLFGMPPCL	peptideci
CASSGGQGNTEAFF	ORF1ab	EBV	CD8	FVDGVPFVV	BMLF-1	GLCTLVAML	peptideci
CASSLGGATEAFF	ORF1ab	M.tuberculosis	CD4	FVDGVPFVV	NA	NA	peptideci
CASSIRSAYEQYF	ORF1ab	Influenza	CD8	FVDGVPFVV	M,M1,Matrix protein (M1)	GILGFVFTL	peptideci
CASSIRSAYEQYF	ORF1ab	EBV	CD8	FVDGVPFVV	BRLF1	YVLDHLIVV	peptideci
CASSPRTGGTEAFF	ORF1ab	HIV	CD8	FVDGVPFVV	Pol	LPPIVAKEI	peptideci
CASSELESYEQYF	ORF1ab	M.tuberculosis	CD4	FVDGVPFVV	NA	NA	peptideci
CASSVVASSYNEQFF	ORF1ab	Influenza	CD8	FVDGVPFVV	M,Matrix protein (M1)	GILGFVFTL	peptideci
CASSLGGNQPQHF	ORF1ab	Influenza	CD8	FVDGVPFVV	NP177	LPRRSGAAGA	peptideci peptidecii
CASSLGGNQPQHF	ORF1ab	Celiac disease	CD4	FVDGVPFVV	NA	NA	peptideci peptidecii
CASSLGGNQPQHF	ORF1ab	Inflammatory bowel disease (IBD)	CD4	FVDGVPFVV	Flagellin	NA	peptideci peptidecii
CASSLGGNQPQHF	ORF1ab	M.tuberculosis	CD4	FVDGVPFVV	NA	NA	peptideci peptidecii
CASSYSGNTEAFF	ORF1ab	CMV	CD8	FVDGVPFVV	pp65	TPRVTGGGAM	peptideci
CASSQGLAGGPDTQYF	ORF1ab	M.tuberculosis	CD4	FVDGVPFVV	NA	NA	peptideci
CASSLLGGTDTQYF	ORF1ab	M.tuberculosis	CD4	FVDGVPFVV	NA	NA	peptideci
CASSLSDTQYF	ORF1ab	Influenza	CD8	FVDGVPFVV	Matrix protein (M1)	GILGFVFTL	peptideci
CASSEGDTEAFF	ORF1ab	HCV	CD8	FVDGVPFVV	NS3	KLVALGINAV	peptideci
CASSPRDRVHEQYF	ORF1ab	Neoantigen		FVDGVPFVV	ERBB2	ALIHHNTHL	peptideci
CASSLGAEQYF	ORF1ab	Neoantigen		FVDGVPFVV,RQLLFVVEV,VLWAHGFEL	MRM1	LLFGMTPCL	peptideci
CASSIGLNTEAFF	ORF1ab	Neoantigen		FVDGVPFVV	OR2T1-FLN-F5L	FLNVLFPLL	peptideci
CASSDRTSGNYEQYF	ORF1ab	M.tuberculosis	CD4	FVDGVPFVV	NA	NA	peptideci
CASSQSGTEAFF	ORF1ab	Influenza	CD8	FVDGVPFVV	NP177	LPRRSGAAGA	peptideci
CASSLEREDYEQYF	ORF1ab	CMV	CD8	FVDGVPFVV	pp50	VTEHDTLLY	peptideci
CASSLEREDYEQYF	ORF1ab	Influenza	CD8	FVDGVPFVV	NP177	LPRRSGAAGA	peptideci
CASSPGTSDYEQYF	ORF1ab	M.tuberculosis	CD4	FVDGVPFVV	NA	NA	peptideci
CASSLGNTGELFF	ORF1ab	CMV	CD8	FVDGVPFVV,APAHISTI,LIVNSVLLFL,LLFLAFVVFL,SVLLFLAFV	UL29/28	FRCPRRFCF	peptideci
CASSVASNEQFF	ORF1ab	Diabetes Type 1	CD4	FVDGVPFVV	NA	NA	peptideci
CASSRGGETQYF	ORF1ab	M.tuberculosis	CD4	FVDGVPFVV	NA	NA	peptideci
CASSLNYGYTF	ORF1ab	M.tuberculosis	CD4	FVDGVPFVV	NA	NA	peptideci
CASSLVSDTQYF	ORF1ab	M.tuberculosis	CD4	FVDGVPFVV	NA	NA	peptideci peptidecii
CASRDRETDTQYF	ORF1ab	M.tuberculosis	CD4	FVDGVPFVV	NA	NA	peptideci
CASSAGDTEAFF	ORF1ab	Neoantigen		FVDGVPFVV	CD47-GLT-V6F	GLTSFFIAI	peptideci
CASSQGGRETQYF	ORF1ab	M.tuberculosis	CD4	FVDGVPFVV	NA	NA	peptideci
CSARYNEQFF	ORF1ab	M.tuberculosis	CD4	FVDGVPFVV	NA	NA	peptideci
CASSLTDTQYF	ORF1ab	Breast Cancer	CD8	FVDGVPFVV,YLNTLTLAV	NA	NA	peptideci
CASSLTDTQYF	ORF1ab	CMV	CD8	FVDGVPFVV,YLNTLTLAV	pp50	VTEHDTLLY	peptideci
CASSLTDTQYF	ORF1ab	Influenza	CD8	FVDGVPFVV,YLNTLTLAV	NP177	LPRRSGAAGA	peptideci
CASSLVNTEAFF	ORF1ab	Influenza	CD8	FVDGVPFVV	NP177	LPRRSGAAGA	peptideci
CASSVGQGAGETQYF	ORF1ab	M.tuberculosis	CD4	FVDGVPFVV	NA	NA	peptideci
CASSQRGGNTGELFF	ORF1ab	M.tuberculosis	CD4	FVDGVPFVV	NA	NA	peptideci
CASSFSSTDTQYF	ORF1ab	Influenza	CD8	FVDGVPFVV	Matrix protein (M1)	GILGFVFTL	peptideci
CASSLDYNEQFF	ORF1ab	Neoantigen		FVDGVPFVV	GNL3L-R4C	NLNCCSVPV	peptideci
CASSLTRGTDTQYF	ORF1ab	M.tuberculosis	CD4	FVDGVPFVV	NA	NA	peptideci
CASSVAGELFF	ORF1ab	M.tuberculosis	CD4	RQLLFVVEV	NA	NA	peptideci
CASSPAYEQYF	ORF1ab	Influenza	CD8	RQLLFVVEV,APAHISTI,LIVNSVLLFL,LLFLAFVVFL,SVLLFLAFV	NP177	LPRRSGAAGA	minigene peptideci
CASSPAYEQYF	ORF1ab	CMV	CD8	RQLLFVVEV,APAHISTI,LIVNSVLLFL,LLFLAFVVFL,SVLLFLAFV	pp65	TPRVTGGGAM	minigene peptideci
CASSPGDEQFF	ORF1ab	Influenza	CD8	RQLLFVVEV	NP177	LPRRSGAAGA	peptideci
CASSPGDEQFF	ORF1ab	CMV	CD8	RQLLFVVEV	IE-1	CRVLCCYVL	peptideci
CASSSTVYNEQFF	ORF1ab	Melanoma		RQLLFVVEV,VLWAHGFEL	Melan-A/MART-1	ELAGIGILTV	peptideci
CASSPPGLPYEQYF	ORF1ab	Celiac disease	CD4	RQLLFVVEV	DQ2-a-II	PQPQLPYPQPQ	peptideci
CASSRTENTEAFF	ORF1ab	M.tuberculosis	CD4	RQLLFVVEV	NA	NA	peptideci
CASSIYSNQPQHF	ORF1ab	Influenza	CD8	RQLLFVVEV	M,Matrix protein (M1)	GILGFVFTL	peptideci
CASSDNQETQYF	ORF1ab	M.tuberculosis	CD4	RQLLFVVEV	NA	NA	peptideci
CASSVSDTQYF	ORF1ab	M.tuberculosis	CD8	RQLLFVVEV	NA	NA	peptideci
CASTLGQGNTEAFF	ORF1ab	Neoantigen		RQLLFVVEV	CELSR1-YLF-F3L	YLLAIFSGL	peptideci peptidecii
CASSPTDYNEQFF	ORF1ab	M.tuberculosis	CD8	RQLLFVVEV	NA	NA	peptideci
CASRGTGNQPQHF	ORF1ab	M.tuberculosis	CD4	RQLLFVVEV	NA	NA	peptideci
CASSTSDTQYF	ORF1ab	EBV	CD8	RQLLFVVEV	BMLF1	GLCTLVAML	peptideci
CASSLGGEAFF	ORF1ab	Celiac disease	CD4	RQLLFVVEV,VLWAHGFEL,YLNTLTLAV	NA	NA	peptideci
CASSPGQGSTDTQYF	ORF1ab	Influenza	CD8	RQLLFVVEV	NP177	LPRRSGAAGA	peptideci
CASSLEVGQETQYF	ORF1ab	Influenza	CD8	RQLLFVVEV	Matrix protein (M1)	GILGFVFTL	peptideci
CASSVGGEQFF	ORF1ab	DENV	CD8	RQLLFVVEV			peptideci
CASSFSGNTGELFF	ORF1ab	M.tuberculosis	CD4	RQLLFVVEV	NA	NA	peptideci
CASSFSGNTGELFF	ORF1ab	EBV	CD8	RQLLFVVEV	BZLF1	RAKFKQLL	peptideci
CASSLTNTEAFF	ORF1ab	M.tuberculosis	CD4	RQLLFVVEV	NA	NA	peptideci
CASSQGNEQFF	ORF1ab	Influenza	CD8	RQLLFVVEV,ILGLPTQTV	Matrix protein (M1)	GILGFVFTL	peptideci
CASSLAGGPYEQYF	ORF1ab	Influenza	CD8	RQLLFVVEV	NP177	LPRRSGAAGA	peptideci
CASSLAGGPYEQYF	ORF1ab	M.tuberculosis	CD4	RQLLFVVEV	NA	NA	peptideci
CASSQDPAVQETQYF	ORF1ab	M.tuberculosis	CD4	ATVVIGTSK	NA	NA	peptideci
CASSLAGGTEAFF	ORF1ab	Neoantigen		ATVVIGTSK,DTDFVNEFYAY,NRDVDTDFVNEFY	TRPV3-LLL-A8V	LLLNMLIVL	peptideci minigene peptidecii
CASSLAGGTEAFF	ORF1ab	M.tuberculosis	CD4	ATVVIGTSK,DTDFVNEFYAY,NRDVDTDFVNEFY	NA	NA	peptideci minigene peptidecii
CASSLSGVAYGYTF	ORF1ab	Neoantigen		MVMCGGSLYV,VMCGGSLYV	NSDHL	ILTGLNYEA	peptideci
CASKGAETQYF	ORF1ab	M.tuberculosis	CD4	MVMCGGSLYV,VMCGGSLYV	NA	NA	peptideci peptidecii
CASSFGTFETQYF	ORF1ab	EBV	CD8	MVMCGGSLYV,VMCGGSLYV	BMLF1,BMLF-1	GLCTLVAML	peptideci
CASSFGSYNEQFF	ORF1ab	Influenza	CD4 CD8	MVMCGGSLYV,VMCGGSLYV,MMISAGFSL	M1,NP177	QARQMVQAMRTIGTHP,LPRRSGAAGA	peptideci
CASSRISSYNEQFF	ORF1ab	M.tuberculosis	CD4	MVMCGGSLYV,VMCGGSLYV	NA	NA	peptideci
CASSSGGGNQPQHF	ORF1ab	M.tuberculosis	CD4	MVMCGGSLYV,VMCGGSLYV	NA	NA	peptideci
CASSESDSNQPQHF	ORF1ab	M.tuberculosis	CD4	MVMCGGSLYV,VMCGGSLYV	NA	NA	peptideci
CASSWGTSGEQYF	ORF1ab	M.tuberculosis	CD4	MVMCGGSLYV,VMCGGSLYV	NA	NA	peptideci
CASSFGVGQPQHF	ORF1ab	Neoantigen		MVMCGGSLYV,VMCGGSLYV	VN1R2-LML-L3F	LMFWASSSI	peptideci
CASSLGTYEKLFF	ORF1ab	M.tuberculosis	CD4	MVMCGGSLYV,VMCGGSLYV	NA	NA	peptideci
CASSLGTLNEQFF	ORF1ab	Neoantigen		MVMCGGSLYV,VMCGGSLYV	MLL2	ALSPVIPLI	peptideci
CASTRGSTDTQYF	ORF1ab	HIV	CD4	MVMCGGSLYV,VMCGGSLYV	Gag	FRDYVDRFYKTLRAEQASQE	peptideci
CASSPGSYNEQFF	ORF1ab	M.tuberculosis	CD4	MVMCGGSLYV,VMCGGSLYV	NA	NA	peptideci
CASSQGTTDTQYF	ORF1ab	HIV	CD8	MVMCGGSLYV,VMCGGSLYV	Gag,Gag p24	KRWIILGLNK,KRWIIMGLNK	peptideci
CASSPGSTDTQYF	ORF1ab	CMV	CD8	MVMCGGSLYV,VMCGGSLYV,VLWAHGFEL	pp50	VTEHDTLLY	peptideci
CASSPGSTDTQYF	ORF1ab	Influenza	CD8	MVMCGGSLYV,VMCGGSLYV,VLWAHGFEL	NP177	LPRRSGAAGA	peptideci
CASSLGLYNEQFF	ORF1ab	M.tuberculosis	CD4	MVMCGGSLYV,VMCGGSLYV	NA	NA	peptideci
CASSLGTGGGEQYF	ORF1ab	M.tuberculosis	CD4	MVMCGGSLYV,VMCGGSLYV	NA	NA	peptideci
CASSLGLAGEQYF	ORF1ab	M.tuberculosis	CD4	DTDFVNEFYAY,NRDVDTDFVNEFY	NA	NA	peptideci
CASSLRNTEAFF	ORF1ab	M.tuberculosis	CD4	DTDFVNEFYAY,NRDVDTDFVNEFY	NA	NA	peptideci
CASSPGGGELFF	ORF1ab	Neoantigen		DTDFVNEFYAY,NRDVDTDFVNEFY	OR5M3-KMV-T8N	KMVAVFYNT	peptideci
CASSQGSYGYTF	ORF1ab	Influenza	CD8	DTDFVNEFYAY,NRDVDTDFVNEFY	Matrix protein (M1)	GILGFVFTL	peptideci
CASSQGSYGYTF	ORF1ab	Diabetes Type 1	CD4	DTDFVNEFYAY,NRDVDTDFVNEFY	NA	NA	peptideci
CASRPGGNTEAFF	ORF1ab	M.tuberculosis	CD4	DTDFVNEFYAY,NRDVDTDFVNEFY	NA	NA	peptideci
CASSFSPSSYNEQFF	ORF1ab	Influenza	CD8	LVLSVNPYV	Matrix protein (M1)	GILGFVFTL	peptideci
CASSDIYEQYF	ORF1ab	EBV	CD8	KLSYGIATV	BMLF-1	GLCTLVAML	peptideci
CASSLGQGEQFF	ORF1ab	Influenza	CD4	KLSYGIATV	HA	PKYVKQNTLKLAT	peptideci
CASSHNEQFF	ORF1ab	Influenza	CD8	KLSYGIATV	NP177	LPRRSGAAGA	peptideci
CASSLAGDYEQYF	ORF1ab	CMV	CD8	KLSYGIATV	pp65	NLVPMVATV	peptideci
CASSLGSGTQYF	ORF1ab	HCV		KLSYGIATV	HCV-KLV	KLVALGINAV	peptideci
CASSYPPPEAFF	ORF1ab	CMV	CD8	KLSYGIATV	IE-1	CRVLCCYVL	peptideci
CASSLGQGEQYF	ORF1ab	Influenza	CD4	KLSYGIATV	HA	PKYVKQNTLKLAT	peptideci
CASSEVHEQYF	ORF1ab	M.tuberculosis	CD4	KLSYGIATV	NA	NA	peptideci
CASSLGQGEAFF	ORF1ab	EBV	CD8	KLSYGIATV	BMLF-1	GLCTLVAML	peptideci
CASSSGLNTEAFF	ORF1ab	M.tuberculosis	CD4	KLSYGIATV	NA	NA	peptideci
CASSLVGGITGELFF	ORF1ab	Neoantigen		KLSYGIATV	ZNT8-VVT	VVTGVLVYL	peptideci
CASSLMGGGTDTQYF	ORF1ab	M.tuberculosis	CD4	KLSYGIATV	NA	NA	peptideci
CASSGTGFSYEQYF	ORF1ab	M.tuberculosis	CD4	KLSYGIATV	NA	NA	peptideci
CASSEVYEQYF	ORF1ab	M.tuberculosis	CD4	KLSYGIATV	NA	NA	peptideci minigene
CASSWTAYEQYF	ORF1ab	M.tuberculosis	CD4	KLSYGIATV	NA	NA	peptideci
CASSEDGGYGYTF	ORF1ab	M.tuberculosis	CD4	KLSYGIATV	NA	NA	peptideci
CASSYSGGYEQYF	ORF1ab	Neoantigen		KLSYGIATV	GNL3L-R4C	NLNCCSVPV	peptideci
CASRTGNTEAFF	ORF1ab	Celiac disease	CD4	VVYRGTTTY	NA	NA	peptideci
CASSQDLRGDNEQFF	ORF1ab	M.tuberculosis	CD4	VVYRGTTTY	NA	NA	peptideci
CASSSGGNEQFF	ORF1ab	EBV	CD8	VVYRGTTTY	BMLF-1	GLCTLVAML	peptideci
CASSSTGELFF	ORF1ab	Celiac disease	CD4	VVYRGTTTY	NA	NA	peptideci
CASSSTGELFF	ORF1ab	CMV	CD8	VVYRGTTTY	pp65	RPHERNGFTVL	peptideci
CASSLSGGTDTQYF	ORF1ab	Influenza	CD8	VVYRGTTTY	NP177	LPRRSGAAGA	peptideci
CASSLGGNEQFF	ORF1ab	Celiac disease	CD4	VVYRGTTTY,VLWAHGFEL	NA	NA	peptideci peptidecii
CASSLGGNEQFF	ORF1ab	M.tuberculosis	CD4	VVYRGTTTY,VLWAHGFEL	NA	NA	peptideci peptidecii
CASSQTRATNEKLFF	ORF1ab	M.tuberculosis	CD4	VVYRGTTTY	NA	NA	peptideci
CASSLDSYNEQFF	ORF1ab	Influenza	CD8	KLNVGDYFV	NP177	LPRRSGAAGA	peptideci
CASSWGRTYEQYF	ORF1ab	Influenza	CD8	KLNVGDYFV	NP177	LPRRSGAAGA	peptideci
CASRDSSGANVLTF	ORF1ab	M.tuberculosis	CD4	KLNVGDYFV	NA	NA	peptideci
CASSLGTVYEQYF	ORF1ab	M.tuberculosis	CD4	KLNVGDYFV	NA	NA	peptideci
CASSDSYGYTF	ORF1ab	HCV	CD8	KLNVGDYFV	NS3	KLVALGINAV	peptideci minigene
CASSVGSTEAFF	ORF1ab	Neoantigen		TLVPQEHYV	NSDHL-ILT-A9V	ILTGLNYEV	peptideci
CASSLQVQETQYF	ORF1ab	M.tuberculosis	CD4	TLVPQEHYV	NA	NA	peptideci
CASSEGNTGELFF	ORF1ab	M.tuberculosis	CD8	TLVPQEHYV	NA	NA	peptideci
CASSVGNTEAFF	ORF1ab	Neoantigen		TLVPQEHYV	GALC-YVV-V3L	YVLTWIVGA	peptideci
CASSDDRGPYEQYF	ORF1ab	HCV	CD8	IVDTVSALV	NS3	KLVALGINAV	peptideci
CATSTGDSNQPQHF	ORF1ab	EBV	CD8	IVDTVSALV	BZLF1	EPLPQGQLTAY	peptideci
CASSFGDSYEQYF	ORF1ab	YFV		IVDTVSALV	YFV-LLW	LLWNGPMAV	peptideci
CASSQDRLTGGYTF	ORF1ab	EBV	CD8	IPRRNVATL	EBNA3A	RPPIFIRRL	peptideci
CASSGGTGELFF	ORF1ab	M.tuberculosis	CD4	VLWAHGFEL	NA	NA	peptideci
CASSSGSYEQYF	ORF1ab	Influenza	CD8	VLWAHGFEL,APAHISTI,LIVNSVLLFL,LLFLAFVVFL,SVLLFLAFV	NP177	LPRRSGAAGA	peptideci
CASSSGSYEQYF	ORF1ab	DENV	CD8	VLWAHGFEL,APAHISTI,LIVNSVLLFL,LLFLAFVVFL,SVLLFLAFV			peptideci
CASSLGGEQFF	ORF1ab	CMV	CD8	VLWAHGFEL	pp50	VTEHDTLLY	peptideci
CASSLGGEQFF	ORF1ab	Influenza	CD8	VLWAHGFEL	NP177	LPRRSGAAGA	peptideci
CASSRGDTEAFF	ORF1ab	HCV	CD8	VLWAHGFEL	NS3	KLVALGINAV	peptideci
CASSLGVNTEAFF	ORF1ab	Influenza	CD8	VLWAHGFEL	NP	DATYQRTRALVR	peptideci peptidecii
CASSLGWGPNEQFF	ORF1ab	HIV	CD8	VLWAHGFEL	Gag	RLRPGGKKK	peptideci
CASSPTGNEQFF	ORF1ab	Neoantigen		VLWAHGFEL	WDR46-FLT-T3I	FLIYLDVSV	peptideci
CASSAGGSYEQYF	ORF1ab	CMV	CD8	VLWAHGFEL	IE-1	CRVLCCYVL	peptideci
CASSLGQGNTGELFF	ORF1ab	M.tuberculosis	CD4	VLWAHGFEL	NA	NA	peptideci
CASSLGLAGYEQYF	ORF1ab	EBV	CD8	VLWAHGFEL	EBNA3A		peptideci
CASSLGLAGTYEQYF	ORF1ab	M.tuberculosis	CD4	VLWAHGFEL	NA	NA	peptideci
CASSATGTGGYEQYF	ORF1ab	YFV	CD8	VLWAHGFEL	YFV-17D	LLWNGPMAV	peptideci
CASSLNSNTGELFF	ORF1ab	M.tuberculosis	CD4	VLWAHGFEL	NA	NA	peptideci
CASSSGGVYEQYF	ORF1ab	CMV	CD8	VLWAHGFEL	pp65	IPSINVHHY	peptideci
CASSLGGGYTF	ORF1ab	HIV	CD8	VLWAHGFEL	Gag,Gag p24	KAFSPEVIPMF	peptideci
CASSLGLGNTGELFF	ORF1ab	M.tuberculosis	CD4	VLWAHGFEL	NA	NA	peptideci
CASSLGGDGYTF	ORF1ab	M.tuberculosis	CD4	VLWAHGFEL	NA	NA	peptideci
CASGLDQPQHF	ORF1ab	M.tuberculosis	CD4	VLWAHGFEL	NA	NA	peptideci
CASSQAYEQYF	ORF1ab	M.tuberculosis	CD4	VLWAHGFEL	NA	NA	peptideci
CASSLGQGTDTQYF	ORF1ab	Influenza	CD8	VLWAHGFEL	NP177	LPRRSGAAGA	peptideci
CASSLGQGTDTQYF	ORF1ab	M.tuberculosis	CD4	VLWAHGFEL	NA	NA	peptideci
CSADRGNEQFF	ORF1ab	M.tuberculosis	CD4	VLWAHGFEL	NA	NA	peptideci
CASSLAGGGGTDTQYF	ORF1ab	Influenza	CD8	VLWAHGFEL	NP177	LPRRSGAAGA	peptideci
CASSLELNTGELFF	ORF1ab	M.tuberculosis	CD4	VLWAHGFEL	NA	NA	peptideci
CASSMGGEQYF	ORF1ab	HCV	CD8	VLWAHGFEL	NS3	KLVALGINAV	peptideci
CASSPPGSSYNEQFF	ORF1ab	M.tuberculosis	CD4	AIMTRCLAV	NA	NA	peptideci
CASSLGTDSNQPQHF	ORF1ab	M.tuberculosis	CD4	YLDAYNMMI	NA	NA	peptideci
CASSPGGGNQPQHF	ORF1ab	Psoriatic arthritis		YLDAYNMMI	NA	NA	peptideci
CASSLGASYNEQFF	ORF1ab	M.tuberculosis	CD4	YLDAYNMMI,APAHISTI,LIVNSVLLFL,LLFLAFVVFL,SVLLFLAFV	NA	NA	peptideci
CASSLGASTDTQYF	ORF1ab	EBV	CD8	YLDAYNMMI	EBNA3A	RPPIFIRRL	peptideci
CASSLGAGQETQYF	ORF1ab	M.tuberculosis	CD4	YLDAYNMMI	NA	NA	peptideci
CASSVGQGQETQYF	ORF1ab	M.tuberculosis	CD4	YLDAYNMMI	NA	NA	peptideci
CASRETYEQYF	ORF1ab	Influenza	CD8	YLDAYNMMI	NP177	LPRRSGAAGA	peptideci
CASRETYEQYF	ORF1ab	HCV	CD8	YLDAYNMMI	NS3	ATDALMTGY	peptideci
CASSLRGETQYF	ORF1ab	HIV	CD8	YLDAYNMMI	Gag	GPGHKARVL	peptideci
CASSYDRSYEQYF	ORF1ab	HIV	CD8	NLWNTFTRL	RF10 Protein Nef	RYPLTFGWCF	peptideci
CASSYDRGYEQYF	ORF1ab	HIV	CD8	NLWNTFTRL	RF10 Protein Nef	RYPLTFGWCF	peptideci
CASSAGTAYNEQFF	ORF1ab	CMV	CD8	TTLPVNVAF	UL29/28	FRCPRRFCF	peptideci
CASRLTGGRNQPQHF	ORF1ab	M.tuberculosis	CD4	LLDDFVEII,LLLDDFVEI	NA	NA	peptideci
CSVARGTEAFF	ORF1ab	M.tuberculosis	CD4	LLDDFVEII,LLLDDFVEI	NA	NA	peptideci
CASSFGGFYEQYF	ORF1ab	EBV	CD8	LLDDFVEII,LLLDDFVEI	BMLF-1	GLCTLVAML	peptideci
CASSVGGGYEQYF	ORF1ab	Neoantigen		LLDDFVEII,LLLDDFVEI	ATP6AP1-KLG-G3W	KLWASPLHV	peptideci
CASSPSGSSYNEQFF	ORF1ab	M.tuberculosis	CD4	LLDDFVEII,LLLDDFVEI	NA	NA	peptideci
CASSLLAGPYNEQFF	ORF1ab	Influenza	CD8	LLDDFVEII,LLLDDFVEI	Matrix protein (M1)	GILGFVFTL	peptideci
CASKMNTEAFF	ORF1ab	M.tuberculosis	CD4	LLDDFVEII,LLLDDFVEI	NA	NA	peptideci
CASSPPGQGIYEQYF	ORF1ab	M.tuberculosis	CD8	LLDDFVEII,LLLDDFVEI	NA	NA	peptideci
CASSVGLAGYEQYF	ORF1ab	M.tuberculosis	CD4	LLDDFVEII,LLLDDFVEI	NA	NA	peptideci
CAWTQGLNTEAFF	ORF1ab	Influenza	CD8	GVAMPNLYK	NP177	LPRRSGAAGA	peptideci
CASSLGAGGNQPQHF	ORF1ab	M.tuberculosis	CD4	YLNTLTLAV	NA	NA	peptideci
CASSLGEKLFF	ORF1ab	HCV	CD8	YLNTLTLAV	NS3	KLVALGINAV	peptideci
CASSLGSLETQYF	ORF1ab	M.tuberculosis	CD4	YLNTLTLAV	NA	NA	peptideci
CASSLTANYGYTF	ORF1ab	M.tuberculosis	CD4	YLNTLTLAV	NA	NA	peptideci
CASSLGVGETQYF	ORF1ab	M.tuberculosis	CD4	YLNTLTLAV	NA	NA	peptideci
CASSPGGNTEAFF	ORF1ab	M.tuberculosis	CD4	YLNTLTLAV	NA	NA	peptideci
CASSGQGGTEAFF	ORF1ab	Influenza	CD8	YLNTLTLAV	Matrix protein (M1)	GILGFVFTL	peptideci
CASSLLLNTEAFF	ORF1ab	M.tuberculosis	CD4	YLNTLTLAV	NA	NA	peptideci
CASSQSPGGTQYF	ORF1ab	EBV	CD8	YLNTLTLAV	BMLF1,BMLF-1	GLCTLVAML	peptideci
CASSLRDTQYF	ORF1ab	M.tuberculosis	CD4	YLNTLTLAV	NA	NA	peptideci
CASSLEGGGYEQYF	ORF1ab	Influenza	CD8	TLIGDCATV	NP177	LPRRSGAAGA	peptideci
CASSLEGGGYEQYF	ORF1ab	CMV	CD8	TLIGDCATV	IE2	NEGVKAAW	peptideci
CASSLSQGAYEQYF	ORF1ab	Influenza	CD8	TLIGDCATV	NP177	LPRRSGAAGA	peptideci
CASSLNTEAFF	ORF1ab	Neoantigen		TLIGDCATV	SREBF1-YLQ-L6M	YLQDSMATT	peptideci
CASSLNTEAFF	ORF1ab	M.tuberculosis	CD4	TLIGDCATV	NA	NA	peptideci
CASSEAGETQYF	ORF1ab	M.tuberculosis	CD4	TLIGDCATV	NA	NA	peptideci
CASSLGQPSTDTQYF	surface glycoprotein	Celiac disease	CD4	NLTTRTQL	DQ2-a-II	PQPELPYPQPQ	peptideci
CASSLGNTEAFF	surface glycoprotein	Neoantigen		LPPAYTNSF	SEC24A	FLYNPLTRV	peptideci
CASSLGNTEAFF	surface glycoprotein	EBV	CD8	LPPAYTNSF	BMLF1	GLCTLVAML	peptideci
CASSLGYNEQFF	surface glycoprotein	M.tuberculosis	CD4	LPPAYTNSF	NA	NA	peptideci
CASSLGTEAFF	surface glycoprotein	Influenza	CD8	KVFRSSVLH,VYYPDKVFR,YPDKVFRSS,YPDKVFRSSV,GYQPYRVVVL,PYRVVVLSF,QPYRVVVL,QPYRVVVLSF,SEPVLKGVKL	NP177	LPRRSGAAGA	peptideci
CASSEQGYEQYF	surface glycoprotein	M.tuberculosis	CD4	KVFRSSVLH,VYYPDKVFR,YPDKVFRSS,YPDKVFRSSV	NA	NA	peptideci
CASSLEGTYEQYF	surface glycoprotein	M.tuberculosis	CD4	KVFRSSVLH,VYYPDKVFR,YPDKVFRSS,YPDKVFRSSV	NA	NA	peptideci
CASSWGAGQPQHF	surface glycoprotein	EBV	CD8	KVFRSSVLH,VYYPDKVFR,YPDKVFRSS,YPDKVFRSSV	BMLF-1	GLCTLVAML	peptideci
CASSLGGTYNEQFF	surface glycoprotein	M.tuberculosis	CD4	STQDLFLPFF,TQDLFLPFF	NA	NA	peptideci
CASSFFPGELFF	surface glycoprotein	Neoantigen		STQDLFLPFF,TQDLFLPFF,YFPLQSYGF	C3orf58-LMV	LMVLHSPSL	peptideci
CASSLGSYEQYF	surface glycoprotein	DENV	CD8	STQDLFLPFF,TQDLFLPFF,LEPLVDLPI,FPNITNLCPF,QPTESIVRF,RFPNITNLCPF,TESIVRFPNI,VQPTESIVRF,VRFPNITNL,APGQTGKIA,GQTGKIADY,KIADYNYKL,QTGKIADYNY,RQIAPGQTGK			peptideci
CASSLRGSGYEQYF	surface glycoprotein	M.tuberculosis	CD4	STQDLFLPFF,TQDLFLPFF	NA	NA	peptideci
CASSWTGNTEAFF	surface glycoprotein	Neoantigen		STQDLFLPFF,TQDLFLPFF	FNDC3B	VVLSWAPPV	peptideci
CASSTRSTDTQYF	surface glycoprotein	Influenza	CD8	FFSNVTWFH,FLPFFSNVT,LPFFSNVTW,LPFFSNVTWF,PFFSNVTWF,SNVTWFHAI	M,Matrix protein (M1)	GILGFVFTL	peptideci
CASSAGSYGYTF	surface glycoprotein	Influenza	CD8	FFSNVTWFH,FLPFFSNVT,LPFFSNVTW,LPFFSNVTWF,PFFSNVTWF,SNVTWFHAI	Matrix protein (M1)	GILGFVFTL	peptideci
CASSIRSSYEQYF	surface glycoprotein	Influenza	CD8	FFSNVTWFH,FLPFFSNVT,LPFFSNVTW,LPFFSNVTWF,PFFSNVTWF,SNVTWFHAI,FPNITNLCPF,QPTESIVRF,RFPNITNLCPF,TESIVRFPNI,VQPTESIVRF,VRFPNITNL	M,M1,Matrix protein (M1),IV-GIL	GILGFVFTL	peptideci
CASSIRSSYEQYF	surface glycoprotein	EBV	CD8	FFSNVTWFH,FLPFFSNVT,LPFFSNVTW,LPFFSNVTWF,PFFSNVTWF,SNVTWFHAI,FPNITNLCPF,QPTESIVRF,RFPNITNLCPF,TESIVRFPNI,VQPTESIVRF,VRFPNITNL	BMLF1	GLCTLVAML	peptideci
CASSVRSSYEQYF	surface glycoprotein	Influenza	CD8	FFSNVTWFH,FLPFFSNVT,LPFFSNVTW,LPFFSNVTWF,PFFSNVTWF,SNVTWFHAI	M,M1,Matrix protein (M1)	GILGFVFTL	peptideci
CASSIRSTGELFF	surface glycoprotein	Influenza	CD8	FFSNVTWFH,FLPFFSNVT,LPFFSNVTW,LPFFSNVTWF,PFFSNVTWF,SNVTWFHAI	M,Matrix protein (M1)	GILGFVFTL	peptideci
CASSIRSTGELFF	surface glycoprotein	EBV	CD8	FFSNVTWFH,FLPFFSNVT,LPFFSNVTW,LPFFSNVTWF,PFFSNVTWF,SNVTWFHAI	BMLF1,BRLF1	GLCTLVAML,YVLDHLIVV	peptideci
CASSMRSSYEQYF	surface glycoprotein	Influenza	CD8	FFSNVTWFH,FLPFFSNVT,LPFFSNVTW,LPFFSNVTWF,PFFSNVTWF,SNVTWFHAI	M,Matrix protein (M1)	GILGFVFTL	peptideci
CASSLRSTDTQYF	surface glycoprotein	Celiac disease	CD4	FFSNVTWFH,FLPFFSNVT,LPFFSNVTW,LPFFSNVTWF,PFFSNVTWF,SNVTWFHAI	glia-a2,NA,DQ2-a-II	PQPELPYPQPE,NA,PQPQLPYPQPQ	peptideci
CASSLRSTDTQYF	surface glycoprotein	Influenza	CD8	FFSNVTWFH,FLPFFSNVT,LPFFSNVTW,LPFFSNVTWF,PFFSNVTWF,SNVTWFHAI	Matrix protein (M1)	GILGFVFTL	peptideci
CASSIRSTDTQYF	surface glycoprotein	Influenza	CD8	FFSNVTWFH,FLPFFSNVT,LPFFSNVTW,LPFFSNVTWF,PFFSNVTWF,SNVTWFHAI	M,Matrix protein (M1),NP177	GILGFVFTL,LPRRSGAAGA	peptideci
CASSIRSTDTQYF	surface glycoprotein	Celiac disease	CD4	FFSNVTWFH,FLPFFSNVT,LPFFSNVTW,LPFFSNVTWF,PFFSNVTWF,SNVTWFHAI	DQ2-a-II	PQPELPYPQPE,PQPELPYPQPQ	peptideci
CASSLRSTGELFF	surface glycoprotein	EBV	CD8	FFSNVTWFH,FLPFFSNVT,LPFFSNVTW,LPFFSNVTWF,PFFSNVTWF,SNVTWFHAI	BMLF1	GLCTLVAML	peptideci
CASSLRSTGELFF	surface glycoprotein	Influenza	CD8	FFSNVTWFH,FLPFFSNVT,LPFFSNVTW,LPFFSNVTWF,PFFSNVTWF,SNVTWFHAI	M	GILGFVFTL	peptideci
CASSRRSTGELFF	surface glycoprotein	Influenza	CD8	FFSNVTWFH,FLPFFSNVT,LPFFSNVTW,LPFFSNVTWF,PFFSNVTWF,SNVTWFHAI	Matrix protein (M1)	GILGFVFTL	peptideci
CASSMRSTGELFF	surface glycoprotein	Influenza	CD8	FFSNVTWFH,FLPFFSNVT,LPFFSNVTW,LPFFSNVTWF,PFFSNVTWF,SNVTWFHAI	M,Matrix protein (M1)	GILGFVFTL	peptideci
CASSMRSTGELFF	surface glycoprotein	EBV	CD8	FFSNVTWFH,FLPFFSNVT,LPFFSNVTW,LPFFSNVTWF,PFFSNVTWF,SNVTWFHAI	BMLF1,BRLF1	GLCTLVAML,YVLDHLIVV	peptideci
CASSIRSAYEQYF	surface glycoprotein	Influenza	CD8	FFSNVTWFH,FLPFFSNVT,LPFFSNVTW,LPFFSNVTWF,PFFSNVTWF,SNVTWFHAI	M,M1,Matrix protein (M1)	GILGFVFTL	peptideci
CASSIRSAYEQYF	surface glycoprotein	EBV	CD8	FFSNVTWFH,FLPFFSNVT,LPFFSNVTW,LPFFSNVTWF,PFFSNVTWF,SNVTWFHAI	BRLF1	YVLDHLIVV	peptideci
CASSIRASYEQYF	surface glycoprotein	Influenza	CD8	FFSNVTWFH,FLPFFSNVT,LPFFSNVTW,LPFFSNVTWF,PFFSNVTWF,SNVTWFHAI	M,Matrix protein (M1)	GILGFVFTL	peptideci
CASSLRSSYEQYF	surface glycoprotein	Influenza	CD8	FFSNVTWFH,FLPFFSNVT,LPFFSNVTW,LPFFSNVTWF,PFFSNVTWF,SNVTWFHAI,QYIKWPWYI,YEQYIKWPW,YEQYIKWPWY	M,Matrix protein (M1)	GILGFVFTL	peptideci
CASSLRSSYEQYF	surface glycoprotein	Neoantigen	CD8	FFSNVTWFH,FLPFFSNVT,LPFFSNVTW,LPFFSNVTWF,PFFSNVTWF,SNVTWFHAI,QYIKWPWYI,YEQYIKWPW,YEQYIKWPWY	FAM58A-2	FQAQHIAMA	peptideci
CASSMGSYGYTF	surface glycoprotein	Influenza	CD8	FFSNVTWFH,FLPFFSNVT,LPFFSNVTW,LPFFSNVTWF,PFFSNVTWF,SNVTWFHAI	M,Matrix protein (M1)	GILGFVFTL	peptideci
CASSIGAYGYTF	surface glycoprotein	Influenza	CD8	FFSNVTWFH,FLPFFSNVT,LPFFSNVTW,LPFFSNVTWF,PFFSNVTWF,SNVTWFHAI	Matrix protein (M1)	GILGFVFTL	peptideci
CASSSRSAYEQYF	surface glycoprotein	Influenza	CD8	FFSNVTWFH,FLPFFSNVT,LPFFSNVTW,LPFFSNVTWF,PFFSNVTWF,SNVTWFHAI	M,Matrix protein (M1)	GILGFVFTL	peptideci
CASSIRSSNEQFF	surface glycoprotein	Influenza	CD8	FFSNVTWFH,FLPFFSNVT,LPFFSNVTW,LPFFSNVTWF,PFFSNVTWF,SNVTWFHAI	M,Matrix protein (M1)	GILGFVFTL	peptideci
CASSSRSSYEQYF	surface glycoprotein	Melanoma	CD8	FFSNVTWFH,FLPFFSNVT,LPFFSNVTW,LPFFSNVTWF,PFFSNVTWF,SNVTWFHAI	Melan-A/MART-1	EAAGIGILTV	peptideci
CASSSRSSYEQYF	surface glycoprotein	Influenza	CD4 CD8	FFSNVTWFH,FLPFFSNVT,LPFFSNVTW,LPFFSNVTWF,PFFSNVTWF,SNVTWFHAI	M,HA,M1,Matrix protein (M1)	GILGFVFTL,PKYVKQNTLKLAT	peptideci
CASSIYSNQPQHF	surface glycoprotein	Influenza	CD8	FFSNVTWFH,FLPFFSNVT,LPFFSNVTW,LPFFSNVTWF,PFFSNVTWF,SNVTWFHAI	M,Matrix protein (M1)	GILGFVFTL	peptideci
CASSIGVYGYTF	surface glycoprotein	Influenza	CD8	FFSNVTWFH,FLPFFSNVT,LPFFSNVTW,LPFFSNVTWF,PFFSNVTWF,SNVTWFHAI	M,M1,Matrix protein (M1)	GILGFVFTL	peptideci
CASSGRSTGELFF	surface glycoprotein	Influenza	CD8	FFSNVTWFH,FLPFFSNVT,LPFFSNVTW,LPFFSNVTWF,PFFSNVTWF,SNVTWFHAI	M	GILGFVFTL	peptideci
CASSTRSTGELFF	surface glycoprotein	Influenza	CD8	FFSNVTWFH,FLPFFSNVT,LPFFSNVTW,LPFFSNVTWF,PFFSNVTWF,SNVTWFHAI	M,Matrix protein (M1)	GILGFVFTL	peptideci
CASSTRSTGELFF	surface glycoprotein	CMV	CD8	FFSNVTWFH,FLPFFSNVT,LPFFSNVTW,LPFFSNVTWF,PFFSNVTWF,SNVTWFHAI	pp65	NLVPMVATV	peptideci
CASSMRSADTQYF	surface glycoprotein	Influenza	CD8	FFSNVTWFH,FLPFFSNVT,LPFFSNVTW,LPFFSNVTWF,PFFSNVTWF,SNVTWFHAI	M	GILGFVFTL	peptideci
CASSVRASYEQYF	surface glycoprotein	Influenza	CD8	FFSNVTWFH,FLPFFSNVT,LPFFSNVTW,LPFFSNVTWF,PFFSNVTWF,SNVTWFHAI	M	GILGFVFTL	peptideci
CASSGRSTDTQYF	surface glycoprotein	Influenza	CD8	FFSNVTWFH,FLPFFSNVT,LPFFSNVTW,LPFFSNVTWF,PFFSNVTWF,SNVTWFHAI	M,Matrix protein (M1)	GILGFVFTL	peptideci
CASSGRSTDTQYF	surface glycoprotein	Neoantigen	CD8	FFSNVTWFH,FLPFFSNVT,LPFFSNVTW,LPFFSNVTWF,PFFSNVTWF,SNVTWFHAI	ETNK-2	LASYFFWGL	peptideci
CASSIRSGYEQYF	surface glycoprotein	Influenza	CD8	FFSNVTWFH,FLPFFSNVT,LPFFSNVTW,LPFFSNVTWF,PFFSNVTWF,SNVTWFHAI	M,Matrix protein (M1)	GILGFVFTL	peptideci
CASSIRSSDTQYF	surface glycoprotein	Influenza	CD8	FFSNVTWFH,FLPFFSNVT,LPFFSNVTW,LPFFSNVTWF,PFFSNVTWF,SNVTWFHAI	Matrix protein (M1)	GILGFVFTL	peptideci
CASSIISTDTQYF	surface glycoprotein	Influenza	CD8	FFSNVTWFH,FLPFFSNVT,LPFFSNVTW,LPFFSNVTWF,PFFSNVTWF,SNVTWFHAI	Matrix protein (M1)	GILGFVFTL	peptideci
CASSIRAAYEQYF	surface glycoprotein	Influenza	CD8	FFSNVTWFH,FLPFFSNVT,LPFFSNVTW,LPFFSNVTWF,PFFSNVTWF,SNVTWFHAI	Matrix protein (M1)	GILGFVFTL	peptideci
CASSARSTGELFF	surface glycoprotein	Influenza	CD8	FFSNVTWFH,FLPFFSNVT,LPFFSNVTW,LPFFSNVTWF,PFFSNVTWF,SNVTWFHAI	M,Matrix protein (M1)	GILGFVFTL	peptideci
CASSARSTGELFF	surface glycoprotein	Neoantigen	CD8	FFSNVTWFH,FLPFFSNVT,LPFFSNVTW,LPFFSNVTWF,PFFSNVTWF,SNVTWFHAI	Matrix protein (M1)	GILGFVFTL	peptideci
CASSTRSAYEQYF	surface glycoprotein	Influenza	CD8	FFSNVTWFH,FLPFFSNVT,LPFFSNVTW,LPFFSNVTWF,PFFSNVTWF,SNVTWFHAI	M,M1,Matrix protein (M1)	GILGFVFTL	peptideci
CASSTRSAYEQYF	surface glycoprotein	Neoantigen	CD8	FFSNVTWFH,FLPFFSNVT,LPFFSNVTW,LPFFSNVTWF,PFFSNVTWF,SNVTWFHAI	Matrix protein (M1)	GILGFVFTL	peptideci
CASSMRSTDTQYF	surface glycoprotein	Influenza	CD8	FFSNVTWFH,FLPFFSNVT,LPFFSNVTW,LPFFSNVTWF,PFFSNVTWF,SNVTWFHAI	M,Matrix protein (M1)	GILGFVFTL	peptideci
CASSMRSTDTQYF	surface glycoprotein	Neoantigen	CD8	FFSNVTWFH,FLPFFSNVT,LPFFSNVTW,LPFFSNVTWF,PFFSNVTWF,SNVTWFHAI	Matrix protein (M1)	GILGFVFTL	peptideci
CASSSRSAGELFF	surface glycoprotein	Influenza	CD8	FFSNVTWFH,FLPFFSNVT,LPFFSNVTW,LPFFSNVTWF,PFFSNVTWF,SNVTWFHAI	M	GILGFVFTL	peptideci
CASSIRAGETQYF	surface glycoprotein	Influenza	CD8	FFSNVTWFH,FLPFFSNVT,LPFFSNVTW,LPFFSNVTWF,PFFSNVTWF,SNVTWFHAI	M,Matrix protein (M1)	GILGFVFTL	peptideci
CASSVRSTDTQYF	surface glycoprotein	Influenza	CD8	FFSNVTWFH,FLPFFSNVT,LPFFSNVTW,LPFFSNVTWF,PFFSNVTWF,SNVTWFHAI	Matrix protein (M1)	GILGFVFTL	peptideci
CASSVRSTDTQYF	surface glycoprotein	Celiac disease	CD4	FFSNVTWFH,FLPFFSNVT,LPFFSNVTW,LPFFSNVTWF,PFFSNVTWF,SNVTWFHAI	DQ2-a-II,DQ-a-II	PQPELPYPQPQ,PQPELPYPQ	peptideci
CASSKRSTDTQYF	surface glycoprotein	Influenza	CD8	FFSNVTWFH,FLPFFSNVT,LPFFSNVTW,LPFFSNVTWF,PFFSNVTWF,SNVTWFHAI	M,Matrix protein (M1)	GILGFVFTL	peptideci
CASSQRSTDTQYF	surface glycoprotein	Influenza	CD8	FFSNVTWFH,FLPFFSNVT,LPFFSNVTW,LPFFSNVTWF,PFFSNVTWF,SNVTWFHAI	M,Matrix protein (M1)	GILGFVFTL	peptideci
CASSMRSAYEQYF	surface glycoprotein	Influenza	CD8	FFSNVTWFH,FLPFFSNVT,LPFFSNVTW,LPFFSNVTWF,PFFSNVTWF,SNVTWFHAI	Matrix protein (M1)	GILGFVFTL	peptideci
CASSSRSTGELFF	surface glycoprotein	Influenza	CD8	FFSNVTWFH,FLPFFSNVT,LPFFSNVTW,LPFFSNVTWF,PFFSNVTWF,SNVTWFHAI	Matrix protein (M1)	GILGFVFTL	peptideci
CASSIRSGVEQYF	surface glycoprotein	Influenza	CD8	FFSNVTWFH,FLPFFSNVT,LPFFSNVTW,LPFFSNVTWF,PFFSNVTWF,SNVTWFHAI	Matrix protein (M1)	GILGFVFTL	peptideci
CASSWDSSYEQYF	surface glycoprotein	CMV	CD8	FFSNVTWFH,FLPFFSNVT,LPFFSNVTW,LPFFSNVTWF,PFFSNVTWF,SNVTWFHAI	pp50	VTEHDTLLY	peptideci
CASSWDSSYEQYF	surface glycoprotein	Influenza	CD8	FFSNVTWFH,FLPFFSNVT,LPFFSNVTW,LPFFSNVTWF,PFFSNVTWF,SNVTWFHAI	NP177	LPRRSGAAGA	peptideci
CASSIRSGETQYF	surface glycoprotein	Influenza	CD8	FFSNVTWFH,FLPFFSNVT,LPFFSNVTW,LPFFSNVTWF,PFFSNVTWF,SNVTWFHAI	M	GILGFVFTL	peptideci
CASSTRSSYEQYF	surface glycoprotein	Influenza	CD8	FFSNVTWFH,FLPFFSNVT,LPFFSNVTW,LPFFSNVTWF,PFFSNVTWF,SNVTWFHAI	M,Matrix protein (M1)	GILGFVFTL	peptideci
CASSTRSSYEQYF	surface glycoprotein	YFV	CD8	FFSNVTWFH,FLPFFSNVT,LPFFSNVTW,LPFFSNVTWF,PFFSNVTWF,SNVTWFHAI	YFV-17D	LLWNGPMAV	peptideci
CASSTRSSYEQYF	surface glycoprotein	EBV	CD8	FFSNVTWFH,FLPFFSNVT,LPFFSNVTW,LPFFSNVTWF,PFFSNVTWF,SNVTWFHAI	BRLF1	YVLDHLIVV	peptideci
CASSLGGTEAFF	surface glycoprotein	Influenza	CD8	FFSNVTWFH,FLPFFSNVT,LPFFSNVTW,LPFFSNVTWF,PFFSNVTWF,SNVTWFHAI,DGVYFASTEK,GVYFASTEK,LPFNDGVYF,LPFNDGVYFA,VLPFNDGVY,VLPFNDGVYF	NP177	LPRRSGAAGA	peptideci
CASSLGGTEAFF	surface glycoprotein	Celiac disease	CD4	FFSNVTWFH,FLPFFSNVT,LPFFSNVTW,LPFFSNVTWF,PFFSNVTWF,SNVTWFHAI,DGVYFASTEK,GVYFASTEK,LPFNDGVYF,LPFNDGVYFA,VLPFNDGVY,VLPFNDGVYF	NA	NA	peptideci
CASSLGGTEAFF	surface glycoprotein	Neoantigen		FFSNVTWFH,FLPFFSNVT,LPFFSNVTW,LPFFSNVTWF,PFFSNVTWF,SNVTWFHAI,DGVYFASTEK,GVYFASTEK,LPFNDGVYF,LPFNDGVYFA,VLPFNDGVY,VLPFNDGVYF	OR5M3-KMV	KMVAVFYTT	peptideci
CASSIRSSTEAFF	surface glycoprotein	Influenza	CD8	FFSNVTWFH,FLPFFSNVT,LPFFSNVTW,LPFFSNVTWF,PFFSNVTWF,SNVTWFHAI	M,M1,Matrix protein (M1)	GILGFVFTL	peptideci
CASSVRSAYEQYF	surface glycoprotein	Influenza	CD8	FFSNVTWFH,FLPFFSNVT,LPFFSNVTW,LPFFSNVTWF,PFFSNVTWF,SNVTWFHAI	M,Matrix protein (M1)	GILGFVFTL	peptideci
CASSSRSANEQFF	surface glycoprotein	Influenza	CD8	FFSNVTWFH,FLPFFSNVT,LPFFSNVTW,LPFFSNVTWF,PFFSNVTWF,SNVTWFHAI	M,Matrix protein (M1)	GILGFVFTL	peptideci
CASSIRSTETQYF	surface glycoprotein	Influenza	CD8	FFSNVTWFH,FLPFFSNVT,LPFFSNVTW,LPFFSNVTWF,PFFSNVTWF,SNVTWFHAI	Matrix protein (M1)	GILGFVFTL	peptideci
CASSIGYYGYTF	surface glycoprotein	Influenza	CD8	FFSNVTWFH,FLPFFSNVT,LPFFSNVTW,LPFFSNVTWF,PFFSNVTWF,SNVTWFHAI	M,Matrix protein (M1)	GILGFVFTL	peptideci
CASSQGSYGYTF	surface glycoprotein	Influenza	CD8	FFSNVTWFH,FLPFFSNVT,LPFFSNVTW,LPFFSNVTWF,PFFSNVTWF,SNVTWFHAI	Matrix protein (M1)	GILGFVFTL	peptideci
CASSQGSYGYTF	surface glycoprotein	Diabetes Type 1	CD4	FFSNVTWFH,FLPFFSNVT,LPFFSNVTW,LPFFSNVTWF,PFFSNVTWF,SNVTWFHAI	NA	NA	peptideci
CASSLRSAYEQYF	surface glycoprotein	Influenza	CD8	FFSNVTWFH,FLPFFSNVT,LPFFSNVTW,LPFFSNVTWF,PFFSNVTWF,SNVTWFHAI	Matrix protein (M1)	GILGFVFTL	peptideci
CASSIRSTYEQYF	surface glycoprotein	Influenza	CD8	FFSNVTWFH,FLPFFSNVT,LPFFSNVTW,LPFFSNVTWF,PFFSNVTWF,SNVTWFHAI	Matrix protein (M1)	GILGFVFTL	peptideci
CASSIRAGYEQYF	surface glycoprotein	Influenza	CD8	FFSNVTWFH,FLPFFSNVT,LPFFSNVTW,LPFFSNVTWF,PFFSNVTWF,SNVTWFHAI	Matrix protein (M1)	GILGFVFTL	peptideci
CASSPRSSDTQYF	surface glycoprotein	Influenza	CD8	FFSNVTWFH,FLPFFSNVT,LPFFSNVTW,LPFFSNVTWF,PFFSNVTWF,SNVTWFHAI	Matrix protein (M1)	GILGFVFTL	peptideci
CASSIGSYGYTF	surface glycoprotein	Influenza	CD8	FFSNVTWFH,FLPFFSNVT,LPFFSNVTW,LPFFSNVTWF,PFFSNVTWF,SNVTWFHAI	M,M1,Matrix protein (M1)	GILGFVFTL	peptideci
CASSTGSYGYTF	surface glycoprotein	Influenza	CD8	FFSNVTWFH,FLPFFSNVT,LPFFSNVTW,LPFFSNVTWF,PFFSNVTWF,SNVTWFHAI	Matrix protein (M1)	GILGFVFTL	peptideci
CASSTGSYGYTF	surface glycoprotein	CMV	CD8	FFSNVTWFH,FLPFFSNVT,LPFFSNVTW,LPFFSNVTWF,PFFSNVTWF,SNVTWFHAI	pp65	NLVPMVATV	peptideci
CASSTRSTYEQYF	surface glycoprotein	Influenza	CD8	FFSNVTWFH,FLPFFSNVT,LPFFSNVTW,LPFFSNVTWF,PFFSNVTWF,SNVTWFHAI	Matrix protein (M1)	GILGFVFTL	peptideci
CASSIRSSYEQFF	surface glycoprotein	Influenza	CD8	FFSNVTWFH,FLPFFSNVT,LPFFSNVTW,LPFFSNVTWF,PFFSNVTWF,SNVTWFHAI	Matrix protein (M1)	GILGFVFTL	peptideci
CASSIGLWGYTF	surface glycoprotein	Influenza	CD8	FFSNVTWFH,FLPFFSNVT,LPFFSNVTW,LPFFSNVTWF,PFFSNVTWF,SNVTWFHAI	Matrix protein (M1)	GILGFVFTL	peptideci
CASSSRAAYEQYF	surface glycoprotein	Influenza	CD8	FFSNVTWFH,FLPFFSNVT,LPFFSNVTW,LPFFSNVTWF,PFFSNVTWF,SNVTWFHAI	M	GILGFVFTL	peptideci
CASSIGLYGYTF	surface glycoprotein	Influenza	CD8	FFSNVTWFH,FLPFFSNVT,LPFFSNVTW,LPFFSNVTWF,PFFSNVTWF,SNVTWFHAI	Matrix protein (M1)	GILGFVFTL	peptideci
CASSSRSQETQYF	surface glycoprotein	M.tuberculosis	CD4	FFSNVTWFH,FLPFFSNVT,LPFFSNVTW,LPFFSNVTWF,PFFSNVTWF,SNVTWFHAI	NA	NA	peptideci
CASSFRSTDTQYF	surface glycoprotein	Celiac disease	CD4	FFSNVTWFH,FLPFFSNVT,LPFFSNVTW,LPFFSNVTWF,PFFSNVTWF,SNVTWFHAI	glia-a2,NA,DQ2-a-II	PQPELPYPQPE,NA,PQPQLPYPQPQ,PQPELPYPQPQ	peptideci
CASSFRSTDTQYF	surface glycoprotein	Influenza	CD8	FFSNVTWFH,FLPFFSNVT,LPFFSNVTW,LPFFSNVTWF,PFFSNVTWF,SNVTWFHAI	M,Matrix protein (M1)	GILGFVFTL	peptideci
CASSTGAYGYTF	surface glycoprotein	Influenza	CD8	FFSNVTWFH,FLPFFSNVT,LPFFSNVTW,LPFFSNVTWF,PFFSNVTWF,SNVTWFHAI	Matrix protein (M1)	GILGFVFTL	peptideci
CASSTGLYGYTF	surface glycoprotein	Influenza	CD8	FFSNVTWFH,FLPFFSNVT,LPFFSNVTW,LPFFSNVTWF,PFFSNVTWF,SNVTWFHAI	M,Matrix protein (M1)	GILGFVFTL	peptideci
CASSISSTGELFF	surface glycoprotein	Influenza	CD8	FFSNVTWFH,FLPFFSNVT,LPFFSNVTW,LPFFSNVTWF,PFFSNVTWF,SNVTWFHAI	M,Matrix protein (M1)	GILGFVFTL	peptideci
CASSSRSTDTQYF	surface glycoprotein	Influenza	CD8	FFSNVTWFH,FLPFFSNVT,LPFFSNVTW,LPFFSNVTWF,PFFSNVTWF,SNVTWFHAI	Matrix protein (M1)	GILGFVFTL	peptideci
CASSPRSTDTQYF	surface glycoprotein	Influenza	CD8	FFSNVTWFH,FLPFFSNVT,LPFFSNVTW,LPFFSNVTWF,PFFSNVTWF,SNVTWFHAI	Matrix protein (M1),IV-GIL	GILGFVFTL	peptideci
CASSGRATGELFF	surface glycoprotein	Influenza	CD8	FFSNVTWFH,FLPFFSNVT,LPFFSNVTW,LPFFSNVTWF,PFFSNVTWF,SNVTWFHAI	Matrix protein (M1)	GILGFVFTL	peptideci
CASSTRSGTEQYF	surface glycoprotein	Influenza	CD8	FFSNVTWFH,FLPFFSNVT,LPFFSNVTW,LPFFSNVTWF,PFFSNVTWF,SNVTWFHAI	Matrix protein (M1)	GILGFVFTL	peptideci
CASSARSADTQYF	surface glycoprotein	Influenza	CD8	FFSNVTWFH,FLPFFSNVT,LPFFSNVTW,LPFFSNVTWF,PFFSNVTWF,SNVTWFHAI	M	GILGFVFTL	peptideci
CASSPRSAYEQYF	surface glycoprotein	Influenza	CD8	FFSNVTWFH,FLPFFSNVT,LPFFSNVTW,LPFFSNVTWF,PFFSNVTWF,SNVTWFHAI	Matrix protein (M1)	GILGFVFTL	peptideci
CASSPRSADTQYF	surface glycoprotein	Influenza	CD8	FFSNVTWFH,FLPFFSNVT,LPFFSNVTW,LPFFSNVTWF,PFFSNVTWF,SNVTWFHAI	Matrix protein (M1)	GILGFVFTL	peptideci
CASSARSTDTQYF	surface glycoprotein	Influenza	CD8	FFSNVTWFH,FLPFFSNVT,LPFFSNVTW,LPFFSNVTWF,PFFSNVTWF,SNVTWFHAI	Matrix protein (M1)	GILGFVFTL	peptideci
CASSLGNEQFF	surface glycoprotein	CMV	CD8	FFSNVTWFH,FLPFFSNVT,LPFFSNVTW,LPFFSNVTWF,PFFSNVTWF,SNVTWFHAI	pp65	NLVPMVATV	peptideci
CASSPRQGNNSPLHF	surface glycoprotein	Influenza	CD8	DGVYFASTEK,GVYFASTEK,LPFNDGVYF,LPFNDGVYFA,VLPFNDGVY,VLPFNDGVYF	NP		peptideci
CASSLAGVETQYF	surface glycoprotein	M.tuberculosis	CD4	DGVYFASTEK,GVYFASTEK,LPFNDGVYF,LPFNDGVYFA,VLPFNDGVY,VLPFNDGVYF	NA	NA	peptideci
CASSLGSSYEQYF	surface glycoprotein	Melanoma		DGVYFASTEK,GVYFASTEK,LPFNDGVYF,LPFNDGVYFA,VLPFNDGVY,VLPFNDGVYF	gp100	YLEPGPVTA	peptideci
CASSLGSSYEQYF	surface glycoprotein	M.tuberculosis	CD4	DGVYFASTEK,GVYFASTEK,LPFNDGVYF,LPFNDGVYFA,VLPFNDGVY,VLPFNDGVYF	NA	NA	peptideci
CASSLGVNTEAFF	surface glycoprotein	Influenza	CD8	DGVYFASTEK,GVYFASTEK,LPFNDGVYF,LPFNDGVYFA,VLPFNDGVY,VLPFNDGVYF,NATRFASVYAWNRKRISNC,RVQPTESIVRFPNITNLCP,SNCVADYSVLYNSASFSTF,VRFPNITNLCPFGEVFNAT,YAWNRKRISNCVADYSVLY	NP	DATYQRTRALVR	peptideci peptidecii
CASSPTSGRADTQYF	surface glycoprotein	Influenza	CD8	DGVYFASTEK,GVYFASTEK,LPFNDGVYF,LPFNDGVYFA,VLPFNDGVY,VLPFNDGVYF	NP177	LPRRSGAAGA	peptideci
CASSVGGGSSYEQYF	surface glycoprotein	Neoantigen		DGVYFASTEK,GVYFASTEK,LPFNDGVYF,LPFNDGVYFA,VLPFNDGVY,VLPFNDGVYF	NSDHL-A9V	ILTGLNYEV	peptideci
CAWSSGNTYEQYF	surface glycoprotein	Influenza	CD8	DGVYFASTEK,GVYFASTEK,LPFNDGVYF,LPFNDGVYFA,VLPFNDGVY,VLPFNDGVYF	NP177	LPRRSGAAGA	peptideci
CASSLGSAGNEQFF	surface glycoprotein	CMV	CD8	DGVYFASTEK,GVYFASTEK,LPFNDGVYF,LPFNDGVYFA,VLPFNDGVY,VLPFNDGVYF	pp65	TPRVTGGGAM	peptideci
CASSLSGSSYNEQFF	surface glycoprotein	M.tuberculosis	CD4	DGVYFASTEK,GVYFASTEK,LPFNDGVYF,LPFNDGVYFA,VLPFNDGVY,VLPFNDGVYF	NA	NA	peptideci
CASSLGVETQYF	surface glycoprotein	M.tuberculosis	CD4	DGVYFASTEK,GVYFASTEK,LPFNDGVYF,LPFNDGVYFA,VLPFNDGVY,VLPFNDGVYF	NA	NA	peptideci
CASSLALNTEAFF	surface glycoprotein	M.tuberculosis	CD4	DGVYFASTEK,GVYFASTEK,LPFNDGVYF,LPFNDGVYFA,VLPFNDGVY,VLPFNDGVYF	NA	NA	peptideci
CASSLGSSGNEQFF	surface glycoprotein	CMV	CD8	DGVYFASTEK,GVYFASTEK,LPFNDGVYF,LPFNDGVYFA,VLPFNDGVY,VLPFNDGVYF	pp65	TPRVTGGGAM	peptideci
CASSLKGNTEAFF	surface glycoprotein	YFV	CD8	DGVYFASTEK,GVYFASTEK,LPFNDGVYF,LPFNDGVYFA,VLPFNDGVY,VLPFNDGVYF	YFV-17D	LLWNGPMAV	peptideci
CASSPGTSGAYEQYF	surface glycoprotein	YFV	CD8	DGVYFASTEK,GVYFASTEK,LPFNDGVYF,LPFNDGVYFA,VLPFNDGVY,VLPFNDGVYF	YFV-17D	LLWNGPMAV	peptideci
CASSLVGVNTEAFF	surface glycoprotein	M.tuberculosis	CD4	DGVYFASTEK,GVYFASTEK,LPFNDGVYF,LPFNDGVYFA,VLPFNDGVY,VLPFNDGVYF	NA	NA	peptideci
CASSSGANVLTF	surface glycoprotein	M.tuberculosis	CD4	DGVYFASTEK,GVYFASTEK,LPFNDGVYF,LPFNDGVYFA,VLPFNDGVY,VLPFNDGVYF,TEILPVSMTK	NA	NA	peptideci
CASSLGGTYEQYF	surface glycoprotein	EBV	CD8	DGVYFASTEK,GVYFASTEK,LPFNDGVYF,LPFNDGVYFA,VLPFNDGVY,VLPFNDGVYF	BMLF-1	GLCTLVAML	peptideci
CASSPSGSSYNEQFF	surface glycoprotein	M.tuberculosis	CD4	DGVYFASTEK,GVYFASTEK,LPFNDGVYF,LPFNDGVYFA,VLPFNDGVY,VLPFNDGVYF	NA	NA	peptideci
CASSLLGNTEAFF	surface glycoprotein	Neoantigen		DGVYFASTEK,GVYFASTEK,LPFNDGVYF,LPFNDGVYFA,VLPFNDGVY,VLPFNDGVYF,CNDPFLGVY,CNDPFLGVYY,FCNDPFLGVY	DRIP-MLY	MLYQHLLPL	peptideci
CASSFGGSYEQYF	surface glycoprotein	Allergy		DGVYFASTEK,GVYFASTEK,LPFNDGVYF,LPFNDGVYFA,VLPFNDGVY,VLPFNDGVYF,ASQSIIAYTM,RSVASQSII,SIIAYTMSL,SQSIIAYTM,VASQSIIAY	NA	NA	peptideci
CASSLGVNNEQFF	surface glycoprotein	M.tuberculosis	CD4	DGVYFASTEK,GVYFASTEK,LPFNDGVYF,LPFNDGVYFA,VLPFNDGVY,VLPFNDGVYF	NA	NA	peptideci
CASSLGGTETQYF	surface glycoprotein	Influenza	CD8	TEKSNIIRGW,YFPLQSYGF	NP177	LPRRSGAAGA	peptideci
CASSQDGGSGANVLTF	surface glycoprotein	M.tuberculosis	CD8	TEKSNIIRGW	NA	NA	peptideci
CASSLGGEQFF	surface glycoprotein	CMV	CD8	TEKSNIIRGW,FGEVFNATRF,FNATRFASVY,GEVFNATRF,NATRFASVY	pp50	VTEHDTLLY	peptideci
CASSLGGEQFF	surface glycoprotein	Influenza	CD8	TEKSNIIRGW,FGEVFNATRF,FNATRFASVY,GEVFNATRF,NATRFASVY	NP177	LPRRSGAAGA	peptideci
CASSLVPSGSTDTQYF	surface glycoprotein	CMV	CD8	KSWMESEFRV,SWMESEFRVY,WMESEFRVY	pp65	NLVPMVATV	peptideci
CASSGDSNQPQHF	surface glycoprotein	M.tuberculosis	CD8	KSWMESEFRV,SWMESEFRVY,WMESEFRVY	NA	NA	peptideci
CASSLRNTGELFF	surface glycoprotein	M.tuberculosis	CD4	SSANNCTFEY,VYSSANNCTF,YLQPRTFL,YLQPRTFLL,YYVGYLQPRTF,GKAHFPREGVFVSNGTHWF,GVFVSNGTHWFVTQRNFYE,HWFVTQRNFYEPQIITTDN,PAQEKNFTTAPAICHDGKA,TAPAICHDGKAHFPREGVF,VFLHVTYVPAQEKNFTTAP	NA	NA	peptideci peptidecii
CASSPGGNTEAFF	surface glycoprotein	M.tuberculosis	CD4	SSANNCTFEY,VYSSANNCTF	NA	NA	peptideci
CASSPGTGSYEQYF	surface glycoprotein	EBV	CD8	SSANNCTFEY,VYSSANNCTF,TPINLVRDL,GYQPYRVVVL,PYRVVVLSF,QPYRVVVL,QPYRVVVLSF,NLNESLIDL	BZLF1,BZLF-1	RAKFKQLL	peptideci
CASSPGTGSYEQYF	surface glycoprotein	Influenza	CD8	SSANNCTFEY,VYSSANNCTF,TPINLVRDL,GYQPYRVVVL,PYRVVVLSF,QPYRVVVL,QPYRVVVLSF,NLNESLIDL	NP177	LPRRSGAAGA	peptideci
CASSLGGGTDTQYF	surface glycoprotein	M.tuberculosis	CD4	CTFEYVSQPF,EYVSQPFLM,FEYVSQPFL	NA	NA	peptideci
CASSGGTGELFF	surface glycoprotein	M.tuberculosis	CD4	CTFEYVSQPF,EYVSQPFLM,FEYVSQPFL	NA	NA	peptideci
CASSLLGGTDTQYF	surface glycoprotein	M.tuberculosis	CD4	CTFEYVSQPF,EYVSQPFLM,FEYVSQPFL	NA	NA	peptideci
CASSRPGVGETQYF	surface glycoprotein	M.tuberculosis	CD4	CTFEYVSQPF,EYVSQPFLM,FEYVSQPFL	NA	NA	peptideci
CASSQEAGGEQYF	surface glycoprotein	CMV	CD8	CTFEYVSQPF,EYVSQPFLM,FEYVSQPFL	pp65	NLVPMVATV	peptideci
CASSQGGTEAFF	surface glycoprotein	Influenza	CD8	CTFEYVSQPF,EYVSQPFLM,FEYVSQPFL	NP177	LPRRSGAAGA	peptideci
CASSSTYEQYF	surface glycoprotein	Influenza	CD8	IYSKHTPINL,GVYYHKNNK,VPLHGTIL,YYHKNNKSW,GAGAALQIPFAMQMAYRFN,GLTVLPPLLTDEMIAQYTS,LICAQKFNGLTVLPPLLTD,LTDEMIAQYTSALLAGTIT,TITSGWTFGAGAALQIPFA,YTSALLAGTITSGWTFGAG	NP177	LPRRSGAAGA	peptideci peptidecii
CASSLGQGSYEQYF	surface glycoprotein	DENV	CD8	TPINLVRDL			peptideci
CASSPRGGTASYEQYF	surface glycoprotein	M.tuberculosis	CD4	TPINLVRDL	NA	NA	peptideci
CASSLAGDYEQYF	surface glycoprotein	CMV	CD8	LEPLVDLPI	pp65	NLVPMVATV	peptideci
CASSPLGNQPQHF	surface glycoprotein	Diabetes Type 1	CD4	LEPLVDLPI	NA	NA	peptideci
CASSLEGQASSYEQYF	surface glycoprotein	Melanoma	CD8	LLALHRSYL,AGAAAYYVGY,GAAAYYVGY,WTAGAAAYY,WTAGAAAYYV	Melan-A/MART-1	EAAGIGILTV	peptideci
CASSLEGQASSYEQYF	surface glycoprotein	Influenza	CD8	LLALHRSYL,AGAAAYYVGY,GAAAYYVGY,WTAGAAAYY,WTAGAAAYYV	NP177	LPRRSGAAGA	peptideci
CASSLIGVSSYNEQFF	surface glycoprotein	CMV	CD8	LLALHRSYL	pp65	TPRVTGGGAM	peptideci
CASSLIGVSSYNEQFF	surface glycoprotein	Influenza	CD8	LLALHRSYL	NP,NP177	LPRRSGAAGA	peptideci
CAGSRTGSNEQFF	surface glycoprotein	M.tuberculosis	CD4	YLQPRTFL,YLQPRTFLL,YYVGYLQPRTF	NA	NA	peptideci
CASSDSYEQYF	surface glycoprotein	YFV		YLQPRTFL,YLQPRTFLL,YYVGYLQPRTF,QYIKWPWYI,YEQYIKWPW,YEQYIKWPWY	YFV-LLW	LLWNGPMAV	peptideci
CASSDSYEQYF	surface glycoprotein	Melanoma		YLQPRTFL,YLQPRTFLL,YYVGYLQPRTF,QYIKWPWYI,YEQYIKWPW,YEQYIKWPWY	Melan-A/MART-1	ELAGIGILTV	peptideci
CASSDSYEQYF	surface glycoprotein	M.tuberculosis	CD8	YLQPRTFL,YLQPRTFLL,YYVGYLQPRTF,QYIKWPWYI,YEQYIKWPW,YEQYIKWPWY	NA	NA	peptideci
CASSFVNTGELFF	surface glycoprotein	Neoantigen		YLQPRTFL,YLQPRTFLL,YYVGYLQPRTF	CD1-LLG	LLGATCMFV	peptideci
CASSEGNTGELFF	surface glycoprotein	M.tuberculosis	CD8	YLQPRTFL,YLQPRTFLL,YYVGYLQPRTF	NA	NA	peptideci
CASSSGSSYNEQFF	surface glycoprotein	Influenza	CD8	YLQPRTFL,YLQPRTFLL,YYVGYLQPRTF	Matrix protein (M1)	GILGFVFTL	peptideci
CSADTDTQYF	surface glycoprotein	M.tuberculosis	CD4	YLQPRTFL,YLQPRTFLL,YYVGYLQPRTF	NA	NA	peptideci
CASSSTGELFF	surface glycoprotein	Celiac disease	CD4	YLQPRTFL,YLQPRTFLL,YYVGYLQPRTF	NA	NA	peptideci
CASSSTGELFF	surface glycoprotein	CMV	CD8	YLQPRTFL,YLQPRTFLL,YYVGYLQPRTF	pp65	RPHERNGFTVL	peptideci
CASSLEGYGYTF	surface glycoprotein	CMV	CD8	YLQPRTFL,YLQPRTFLL,YYVGYLQPRTF	pp65	RPHERNGFTVL	peptideci
CASSLADTQYF	surface glycoprotein	M.tuberculosis	CD4	CTLKSFTVEK,SETKCTLKSF,TLKSFTVEK	NA	NA	peptideci
CASSFSYEQYF	surface glycoprotein	Celiac disease	CD4	FPNITNLCPF,QPTESIVRF,RFPNITNLCPF,TESIVRFPNI,VQPTESIVRF,VRFPNITNL,FGEVFNATRF,FNATRFASVY,GEVFNATRF,NATRFASVY,TEILPVSMTK	NA	NA	peptideci
CASSFSYEQYF	surface glycoprotein	M.tuberculosis	CD4	FPNITNLCPF,QPTESIVRF,RFPNITNLCPF,TESIVRFPNI,VQPTESIVRF,VRFPNITNL,FGEVFNATRF,FNATRFASVY,GEVFNATRF,NATRFASVY,TEILPVSMTK	NA	NA	peptideci
CASSFGSSYEQYF	surface glycoprotein	M.tuberculosis	CD4	FPNITNLCPF,QPTESIVRF,RFPNITNLCPF,TESIVRFPNI,VQPTESIVRF,VRFPNITNL	NA	NA	peptideci
CASSLNREETQYF	surface glycoprotein	Celiac disease	CD4	FPNITNLCPF,QPTESIVRF,RFPNITNLCPF,TESIVRFPNI,VQPTESIVRF,VRFPNITNL	NA	NA	peptideci
CASSLGYEQYF	surface glycoprotein	Influenza	CD8	FPNITNLCPF,QPTESIVRF,RFPNITNLCPF,TESIVRFPNI,VQPTESIVRF,VRFPNITNL,GYQPYRVVVL,PYRVVVLSF,QPYRVVVL,QPYRVVVLSF	NP177	LPRRSGAAGA	peptideci
CASSLGYEQYF	surface glycoprotein	Celiac disease	CD4	FPNITNLCPF,QPTESIVRF,RFPNITNLCPF,TESIVRFPNI,VQPTESIVRF,VRFPNITNL,GYQPYRVVVL,PYRVVVLSF,QPYRVVVL,QPYRVVVLSF	NA	NA	peptideci
CASSLGYEQYF	surface glycoprotein	M.tuberculosis	CD4	FPNITNLCPF,QPTESIVRF,RFPNITNLCPF,TESIVRFPNI,VQPTESIVRF,VRFPNITNL,GYQPYRVVVL,PYRVVVLSF,QPYRVVVL,QPYRVVVLSF	NA	NA	peptideci
CASSLTYEQYF	surface glycoprotein	M.tuberculosis	CD4	FPNITNLCPF,QPTESIVRF,RFPNITNLCPF,TESIVRFPNI,VQPTESIVRF,VRFPNITNL,GAGAALQIPFAMQMAYRFN,GLTVLPPLLTDEMIAQYTS,LICAQKFNGLTVLPPLLTD,LTDEMIAQYTSALLAGTIT,TITSGWTFGAGAALQIPFA,YTSALLAGTITSGWTFGAG	NA	NA	peptideci peptidecii
CASSLSYEQYF	surface glycoprotein	Influenza	CD8	FPNITNLCPF,QPTESIVRF,RFPNITNLCPF,TESIVRFPNI,VQPTESIVRF,VRFPNITNL,GAGAALQIPFAMQMAYRFN,GLTVLPPLLTDEMIAQYTS,LICAQKFNGLTVLPPLLTD,LTDEMIAQYTSALLAGTIT,TITSGWTFGAGAALQIPFA,YTSALLAGTITSGWTFGAG	NP177	LPRRSGAAGA	peptideci peptidecii
CASSLSYEQYF	surface glycoprotein	Neoantigen		FPNITNLCPF,QPTESIVRF,RFPNITNLCPF,TESIVRFPNI,VQPTESIVRF,VRFPNITNL,GAGAALQIPFAMQMAYRFN,GLTVLPPLLTDEMIAQYTS,LICAQKFNGLTVLPPLLTD,LTDEMIAQYTSALLAGTIT,TITSGWTFGAGAALQIPFA,YTSALLAGTITSGWTFGAG	PIGN-FLT-P7H	FLTVFSHFM	peptideci peptidecii
CASSLSYEQYF	surface glycoprotein	M.tuberculosis	CD4	FPNITNLCPF,QPTESIVRF,RFPNITNLCPF,TESIVRFPNI,VQPTESIVRF,VRFPNITNL,GAGAALQIPFAMQMAYRFN,GLTVLPPLLTDEMIAQYTS,LICAQKFNGLTVLPPLLTD,LTDEMIAQYTSALLAGTIT,TITSGWTFGAGAALQIPFA,YTSALLAGTITSGWTFGAG	NA	NA	peptideci peptidecii
CASSRDSSSYNEQFF	surface glycoprotein	M.tuberculosis	CD4	FPNITNLCPF,QPTESIVRF,RFPNITNLCPF,TESIVRFPNI,VQPTESIVRF,VRFPNITNL,LYNSASFSTF,NSASFSTFK,SVLYNSASF,YSVLYNSASF	NA	NA	peptideci
CASSPTSGGYNEQFF	surface glycoprotein	M.tuberculosis	CD8	FPNITNLCPF,QPTESIVRF,RFPNITNLCPF,TESIVRFPNI,VQPTESIVRF,VRFPNITNL	NA	NA	peptideci
CASSYSYEQYF	surface glycoprotein	Melanoma	CD8	FPNITNLCPF,QPTESIVRF,RFPNITNLCPF,TESIVRFPNI,VQPTESIVRF,VRFPNITNL,GAGAALQIPFAMQMAYRFN,GLTVLPPLLTDEMIAQYTS,LICAQKFNGLTVLPPLLTD,LTDEMIAQYTSALLAGTIT,TITSGWTFGAGAALQIPFA,YTSALLAGTITSGWTFGAG	NA	NA	peptideci peptidecii
CASSLGETQYF	surface glycoprotein	Influenza	CD8	FPNITNLCPF,QPTESIVRF,RFPNITNLCPF,TESIVRFPNI,VQPTESIVRF,VRFPNITNL,AEIRASANL,AEIRASANLA,ASANLAATK	NP177	LPRRSGAAGA	peptideci
CASSLGETQYF	surface glycoprotein	M.tuberculosis	CD4	FPNITNLCPF,QPTESIVRF,RFPNITNLCPF,TESIVRFPNI,VQPTESIVRF,VRFPNITNL,AEIRASANL,AEIRASANLA,ASANLAATK	NA	NA	peptideci
CASSLGVGTEAFF	surface glycoprotein	Influenza	CD8	FPNITNLCPF,QPTESIVRF,RFPNITNLCPF,TESIVRFPNI,VQPTESIVRF,VRFPNITNL	Matrix protein (M1)	GILGFVFTL	peptideci
CASSLGVGTEAFF	surface glycoprotein	Melanoma		FPNITNLCPF,QPTESIVRF,RFPNITNLCPF,TESIVRFPNI,VQPTESIVRF,VRFPNITNL	Melan-A/MART-1	ELAGIGILTV	peptideci
CASSYSSSSYNEQFF	surface glycoprotein	Influenza	CD8	FPNITNLCPF,QPTESIVRF,RFPNITNLCPF,TESIVRFPNI,VQPTESIVRF,VRFPNITNL	NP,NP44	CTELKLSDY	peptideci
CASSLGGPYEQYF	surface glycoprotein	EBV	CD8	FPNITNLCPF,QPTESIVRF,RFPNITNLCPF,TESIVRFPNI,VQPTESIVRF,VRFPNITNL,AIPTNFTISV,AYSNNSIAIPTNF,IPTNFTISV,NSIAIPTNF	BMLF-1	GLCTLVAML	peptideci
CASSSDRGGYNEQFF	surface glycoprotein	Influenza	CD8	FPNITNLCPF,QPTESIVRF,RFPNITNLCPF,TESIVRFPNI,VQPTESIVRF,VRFPNITNL	Matrix protein (M1)	GILGFVFTL	peptideci
CASSQGQGGYEQYF	surface glycoprotein	EBV	CD8	FPNITNLCPF,QPTESIVRF,RFPNITNLCPF,TESIVRFPNI,VQPTESIVRF,VRFPNITNL	BMLF-1	GLCTLVAML	peptideci
CASSLAGTETQYF	surface glycoprotein	M.tuberculosis	CD4	FPNITNLCPF,QPTESIVRF,RFPNITNLCPF,TESIVRFPNI,VQPTESIVRF,VRFPNITNL	NA	NA	peptideci
CASSQGYEQYF	surface glycoprotein	Neoantigen		FPNITNLCPF,QPTESIVRF,RFPNITNLCPF,TESIVRFPNI,VQPTESIVRF,VRFPNITNL,FPQSAPHGV,FPQSAPHGVVF	PLXNB1-VLF	VLFAAFSSA	peptideci peptidecii
CASSQGYEQYF	surface glycoprotein	M.tuberculosis	CD8	FPNITNLCPF,QPTESIVRF,RFPNITNLCPF,TESIVRFPNI,VQPTESIVRF,VRFPNITNL,FPQSAPHGV,FPQSAPHGVVF	NA	NA	peptideci peptidecii
CASSLGTGELFF	surface glycoprotein	CMV	CD8	FPNITNLCPF,QPTESIVRF,RFPNITNLCPF,TESIVRFPNI,VQPTESIVRF,VRFPNITNL,HVTYVPAQEK,TYVPAQEKNF,VTYVPAQEK,FEYVSQPFLMDLEGKQGNF,FVFKNIDGYFKIYSKHTPI,GNFKNLREFVFKNIDGYFK,LMDLEGKQGNFKNLREFVF,YFKIYSKHTPINLVRDLPQ,YSSANNCTFEYVSQPFLMD	pp65	NLVPMVATV	peptideci peptidecii
CASSPGTDTQYF	surface glycoprotein	CMV	CD8	FPNITNLCPF,QPTESIVRF,RFPNITNLCPF,TESIVRFPNI,VQPTESIVRF,VRFPNITNL	pp50	VTEHDTLLY	peptideci
CASSPGTDTQYF	surface glycoprotein	EBV	CD8	FPNITNLCPF,QPTESIVRF,RFPNITNLCPF,TESIVRFPNI,VQPTESIVRF,VRFPNITNL	BMLF-1	GLCTLVAML	peptideci
CASSPGTDTQYF	surface glycoprotein	Influenza	CD8	FPNITNLCPF,QPTESIVRF,RFPNITNLCPF,TESIVRFPNI,VQPTESIVRF,VRFPNITNL	NP177	LPRRSGAAGA	peptideci
CASSLRNTEAFF	surface glycoprotein	M.tuberculosis	CD4	FPNITNLCPF,QPTESIVRF,RFPNITNLCPF,TESIVRFPNI,VQPTESIVRF,VRFPNITNL	NA	NA	peptideci
CASSPTGSGELFF	surface glycoprotein	Celiac disease	CD4	FPNITNLCPF,QPTESIVRF,RFPNITNLCPF,TESIVRFPNI,VQPTESIVRF,VRFPNITNL	NA	NA	peptideci
CASSLGEGTEAFF	surface glycoprotein	Influenza	CD8	FPNITNLCPF,QPTESIVRF,RFPNITNLCPF,TESIVRFPNI,VQPTESIVRF,VRFPNITNL	NP177	LPRRSGAAGA	peptideci
CASSAGGDTEAFF	surface glycoprotein	Neoantigen		FPNITNLCPF,QPTESIVRF,RFPNITNLCPF,TESIVRFPNI,VQPTESIVRF,VRFPNITNL	NSDHL-A9V	KLVALGINAV	peptideci
CASSPTDSNQPQHF	surface glycoprotein	M.tuberculosis	CD8	FPNITNLCPF,QPTESIVRF,RFPNITNLCPF,TESIVRFPNI,VQPTESIVRF,VRFPNITNL	NA	NA	peptideci
CASSLAGTMNTEAFF	surface glycoprotein	M.tuberculosis	CD4	FPNITNLCPF,QPTESIVRF,RFPNITNLCPF,TESIVRFPNI,VQPTESIVRF,VRFPNITNL	NA	NA	peptideci
CASSLGVNQPQHF	surface glycoprotein	Influenza	CD8	FGEVFNATRF,FNATRFASVY,GEVFNATRF,NATRFASVY	NP177	LPRRSGAAGA	peptideci
CASSLGQGAYEQYF	surface glycoprotein	DENV	CD8	FGEVFNATRF,FNATRFASVY,GEVFNATRF,NATRFASVY			peptideci
CASSLTGELFF	surface glycoprotein	M.tuberculosis	CD4	FGEVFNATRF,FNATRFASVY,GEVFNATRF,NATRFASVY,QYIKWPWYI,YEQYIKWPW,YEQYIKWPWY	NA	NA	peptideci
CASGDYEQYF	surface glycoprotein	M.tuberculosis	CD4	FGEVFNATRF,FNATRFASVY,GEVFNATRF,NATRFASVY	NA	NA	peptideci
CASSLGGGQPQHF	surface glycoprotein	M.tuberculosis	CD4	FGEVFNATRF,FNATRFASVY,GEVFNATRF,NATRFASVY	NA	NA	peptideci
CASSLGGSYNEQFF	surface glycoprotein	M.tuberculosis	CD4	FGEVFNATRF,FNATRFASVY,GEVFNATRF,NATRFASVY,QYIKWPWYI,YEQYIKWPW,YEQYIKWPWY	NA	NA	peptideci
CASSQDRTYEQYF	surface glycoprotein	M.tuberculosis	CD4	CFTNVYADSF,FTNVYADSF,FTNVYADSFV,KLNDLCFTNV,LNDLCFTNVY,NVYADSFVIR,VYADSFVIR	NA	NA	peptideci
CASSLRGNTEAFF	surface glycoprotein	Celiac disease	CD4	CFTNVYADSF,FTNVYADSF,FTNVYADSFV,KLNDLCFTNV,LNDLCFTNVY,NVYADSFVIR,VYADSFVIR	NA	NA	peptideci
CASSLRGNTEAFF	surface glycoprotein	M.tuberculosis	CD4	CFTNVYADSF,FTNVYADSF,FTNVYADSFV,KLNDLCFTNV,LNDLCFTNVY,NVYADSFVIR,VYADSFVIR	NA	NA	peptideci
CASSASGGYNEQFF	surface glycoprotein	M.tuberculosis	CD8	CFTNVYADSF,FTNVYADSF,FTNVYADSFV,KLNDLCFTNV,LNDLCFTNVY,NVYADSFVIR,VYADSFVIR	NA	NA	peptideci
CASSPRGNYGYTF	surface glycoprotein	CMV	CD8	CFTNVYADSF,FTNVYADSF,FTNVYADSFV,KLNDLCFTNV,LNDLCFTNVY,NVYADSFVIR,VYADSFVIR	pp65	NLVPMVATV	peptideci
CASSIGGSSYNEQFF	surface glycoprotein	M.tuberculosis	CD4	CFTNVYADSF,FTNVYADSF,FTNVYADSFV,KLNDLCFTNV,LNDLCFTNVY,NVYADSFVIR,VYADSFVIR	NA	NA	peptideci
CASSLTGNTEAFF	surface glycoprotein	M.tuberculosis	CD4	CFTNVYADSF,FTNVYADSF,FTNVYADSFV,KLNDLCFTNV,LNDLCFTNVY,NVYADSFVIR,VYADSFVIR	NA	NA	peptideci
CASSLTGNTEAFF	surface glycoprotein	HIV	CD8	CFTNVYADSF,FTNVYADSF,FTNVYADSFV,KLNDLCFTNV,LNDLCFTNVY,NVYADSFVIR,VYADSFVIR	Pol	TAFTIPSI	peptideci
CASSFGQGNQPQHF	surface glycoprotein	CMV	CD8	CFTNVYADSF,FTNVYADSF,FTNVYADSFV,KLNDLCFTNV,LNDLCFTNVY,NVYADSFVIR,VYADSFVIR	pp65	RPHERNGFTVL	peptideci
CASSSRGTYEQYF	surface glycoprotein	EBV	CD8	CFTNVYADSF,FTNVYADSF,FTNVYADSFV,KLNDLCFTNV,LNDLCFTNVY,NVYADSFVIR,VYADSFVIR	BMLF-1	GLCTLVAML	peptideci
CASSPAYEQYF	surface glycoprotein	Influenza	CD8	APGQTGKIA,GQTGKIADY,KIADYNYKL,QTGKIADYNY,RQIAPGQTGK	NP177	LPRRSGAAGA	minigene peptideci
CASSPAYEQYF	surface glycoprotein	CMV	CD8	APGQTGKIA,GQTGKIADY,KIADYNYKL,QTGKIADYNY,RQIAPGQTGK	pp65	TPRVTGGGAM	minigene peptideci
CASSGYEQYF	surface glycoprotein	M.tuberculosis	CD4	APGQTGKIA,GQTGKIADY,KIADYNYKL,QTGKIADYNY,RQIAPGQTGK,HLMSFPQSA,YHLMSFPQSA	NA	NA	peptideci
CASSLGLAGYEQYF	surface glycoprotein	EBV	CD8	KLPDDFTGCV	EBNA3A		peptideci
CASSQGSRVGNEQFF	surface glycoprotein	CMV	CD8	KLPDDFTGCV	pp65	RPHERNGFTVL	peptideci
CASSLVRGTDTQYF	surface glycoprotein	M.tuberculosis	CD4	KLPDDFTGCV	NA	NA	peptideci
CASSYGGSSYEQYF	surface glycoprotein	Neoantigen		KLPDDFTGCV	ZDHHC7-SLL-P7L	SLLWMNLFV	peptideci
CASSPYSNQPQHF	surface glycoprotein	Neoantigen		KLPDDFTGCV	GNL3L-R4C	NLNCCSVPV	peptideci
CASSPGWNTEAFF	surface glycoprotein	CMV	CD8	KLPDDFTGCV	IE-1	CRVLCCYVL	peptideci
CASSVGSSYNEQFF	surface glycoprotein	M.tuberculosis	CD4	KLPDDFTGCV	NA	NA	peptideci
CASSFQGSSYEQYF	surface glycoprotein	M.tuberculosis	CD4	KLPDDFTGCV	NA	NA	peptideci
CASSPGGSYNEQFF	surface glycoprotein	M.tuberculosis	CD4	KLPDDFTGCV	NA	NA	peptideci
CASSFGGYEQYF	surface glycoprotein	HCV		KLPDDFTGCV	HCV-KLV	KLVALGINAV	peptideci
CASSLLAGSTDTQYF	surface glycoprotein	M.tuberculosis	CD4	KLPDDFTGCV,FIAGLIAIV	NA	NA	peptideci
CASRTGSNQPQHF	surface glycoprotein	M.tuberculosis	CD4	KLPDDFTGCV	NA	NA	peptideci
CASSEGGGYEQYF	surface glycoprotein	M.tuberculosis	CD4	NYLYRLFRK,NYNYLYRLF	NA	NA	peptideci
CASSLGQGYEQYF	surface glycoprotein	DENV	CD8	NYLYRLFRK,NYNYLYRLF			peptideci
CASSPGQGYEQYF	surface glycoprotein	Neoantigen		NYLYRLFRK,NYNYLYRLF	ATP6AP1-KLG-G3W,OR1G1-FLF	KLWASPLHV,FLFMYLVTV	peptideci
CASSQAGGYEQYF	surface glycoprotein	Neoantigen		NYLYRLFRK,NYNYLYRLF	GNL3L-R4C	NLNCCSVPV	peptideci
CASSYGQGYEQYF	surface glycoprotein	Neoantigen		NYLYRLFRK,NYNYLYRLF	GNL3L-R4C	NLNCCSVPV	peptideci
CASSEGQGYEQYF	surface glycoprotein	Neoantigen		NYLYRLFRK,NYNYLYRLF	TEAD1-VLE-L8F	VLENFTIFLV	peptideci
CASSLTGGYEQYF	surface glycoprotein	CMV	CD8	NYLYRLFRK,NYNYLYRLF	pp50	VTEHDTLLY	peptideci
CASSLTGGYEQYF	surface glycoprotein	Influenza	CD8	NYLYRLFRK,NYNYLYRLF	NP177	LPRRSGAAGA	peptideci
CASSLTSGYEQYF	surface glycoprotein	Psoriatic arthritis		NYLYRLFRK,NYNYLYRLF	NA	NA	peptideci
CASSQGQGYEQYF	surface glycoprotein	Neoantigen		NYLYRLFRK,NYNYLYRLF	CMV-MLN	MLNIPSINV	peptideci
CASSSGQGYEQYF	surface glycoprotein	Influenza	CD8	NYLYRLFRK,NYNYLYRLF	NP177	LPRRSGAAGA	peptideci
CASSFDREETQYF	surface glycoprotein	M.tuberculosis	CD4	NYLYRLFRK,NYNYLYRLF	NA	NA	peptideci
CASSLAQGYEQYF	surface glycoprotein	CMV	CD8	NYLYRLFRK,NYNYLYRLF,QTNSPRRAR,SPRRARSVA,SYQTQTNSPR,TQTNSPRRAR	pp50	VTEHDTLLY	peptideci
CASSLAQGYEQYF	surface glycoprotein	Influenza	CD8	NYLYRLFRK,NYNYLYRLF,QTNSPRRAR,SPRRARSVA,SYQTQTNSPR,TQTNSPRRAR	NP177	LPRRSGAAGA	peptideci
CASSAGQGYEQYF	surface glycoprotein	YFV	CD8	NYLYRLFRK,NYNYLYRLF	YFV-17D	LLWNGPMAV	peptideci
CASSAGQGYEQYF	surface glycoprotein	Neoantigen		NYLYRLFRK,NYNYLYRLF	ATP6AP1-KLG-G3W	KLWASPLHV	peptideci
CASSLVQGYEQYF	surface glycoprotein	EBV	CD8	NYLYRLFRK,NYNYLYRLF	BMLF-1	GLCTLVAML	peptideci
CASSLVQGYEQYF	surface glycoprotein	Influenza	CD8	NYLYRLFRK,NYNYLYRLF	NP177	LPRRSGAAGA	peptideci
CASSLVGSYEQYF	surface glycoprotein	Influenza	CD8	FERDISTEI,FERDISTEIY,KPFERDISTEI	NP177	LPRRSGAAGA	peptideci
CASSLSPNEQFF	surface glycoprotein	Influenza	CD8	FERDISTEI,FERDISTEIY,KPFERDISTEI,LLLQYGSFC,LLQYGSFCT	NP177	LPRRSGAAGA	peptideci
CASSQAGAYEQYF	surface glycoprotein	YFV	CD8	FERDISTEI,FERDISTEIY,KPFERDISTEI	YFV-17D	LLWNGPMAV	peptideci
CASSLAGTYEQYF	surface glycoprotein	Influenza	CD8	FERDISTEI,FERDISTEIY,KPFERDISTEI	NP177	LPRRSGAAGA	peptideci
CASSPPGGNEQFF	surface glycoprotein	Influenza	CD8	FERDISTEI,FERDISTEIY,KPFERDISTEI	NP177	LPRRSGAAGA	peptideci
CASSFNTEAFF	surface glycoprotein	Neoantigen		FERDISTEI,FERDISTEIY,KPFERDISTEI	TRPV4-YLL-A9T	YLLFMIGYT	peptideci
CASSLGGVETQYF	surface glycoprotein	M.tuberculosis	CD4	YFPLQSYGF	NA	NA	peptideci
CASSFAGELFF	surface glycoprotein	CMV	CD8	YFPLQSYGF	IE2	NEGVKAAW	peptideci
CASSFGTGELFF	surface glycoprotein	Influenza	CD8	YFPLQSYGF	NP177	LPRRSGAAGA	peptideci
CASSLLNTEAFF	surface glycoprotein	Influenza	CD8	YFPLQSYGF,QYIKWPWYI,YEQYIKWPW,YEQYIKWPWY	NP177	LPRRSGAAGA	peptideci
CASSLVNTEAFF	surface glycoprotein	Influenza	CD8	YFPLQSYGF	NP177	LPRRSGAAGA	peptideci
CASSYPGELFF	surface glycoprotein	CMV	CD8	YFPLQSYGF	IE-1	CRVLCCYVL	peptideci
CASSLGGEETQYF	surface glycoprotein	EBV	CD8	YFPLQSYGF,GRLQSLQTY,LITGRLQSL,RLQSLQTYV	BMLF-1	GLCTLVAML	peptideci
CASSFGTEAFF	surface glycoprotein	Celiac disease	CD4	YFPLQSYGF,LLLQYGSFC,LLQYGSFCT	NA	NA	peptideci
CASGSYEQYF	surface glycoprotein	Neoantigen		FQPTNGVGY	DHX33-LLA-M4I	LLAIKVPNV	peptideci
CASSPGTGAYEQYF	surface glycoprotein	YFV	CD8	GYQPYRVVVL,PYRVVVLSF,QPYRVVVL,QPYRVVVLSF	YFV-17D	LLWNGPMAV	peptideci
CASSQETQYF	surface glycoprotein	HCV	CD8	GYQPYRVVVL,PYRVVVLSF,QPYRVVVL,QPYRVVVLSF	NS3	KLVALGINAV	peptideci
CASSWGGGEQYF	surface glycoprotein	HCV	CD8	EILDITPCSF	NS3	KLVALGINAV	peptideci
CASSLGPYNEQFF	surface glycoprotein	M.tuberculosis	CD4	TSNQVAVLY	NA	NA	peptideci
CASSPGWGSYEQYF	surface glycoprotein	HIV	CD8	STGSNVFQTR,TGSNVFQTR,VYSTGSNVF	Gag	RLRPGGKKK	peptideci
CASSLRLNQPQHF	surface glycoprotein	CMV	CD8	STGSNVFQTR,TGSNVFQTR,VYSTGSNVF	UL29/28	FRCPRRFCF	peptideci
CASSLGPGELFF	surface glycoprotein	M.tuberculosis	CD4	GAEHVNNSY,IGAEHVNNSY	NA	NA	peptideci
CASSLTASSYEQYF	surface glycoprotein	M.tuberculosis	CD4	GAEHVNNSY,IGAEHVNNSY	NA	NA	peptideci
CASSYRTGELFF	surface glycoprotein	HIV	CD8	GAEHVNNSY,IGAEHVNNSY	Gag	KRWIILGLNK	peptideci
CASSGGYEQYF	surface glycoprotein	YFV		GAEHVNNSY,IGAEHVNNSY	YFV-LLW	LLWNGPMAV	peptideci
CASSPGTGDYEQYF	surface glycoprotein	M.tuberculosis	CD4	IGAGICASY,IPIGAGICASY,NLNESLIDL,KVFRSSVLHSTQDLFLPFF,MFVFLVLLPLVSSQCVNLT,NLTTRTQLPPAYTNSFTRG,PLVSSQCVNLTTRTQLPPA,PPAYTNSFTRGVYYPDKVF,TRGVYYPDKVFRSSVLHST	NA	NA	peptideci peptidecii
CASSVYSGGYNEQFF	surface glycoprotein	Influenza		IGAGICASY,IPIGAGICASY	Matrix protein (M1)	GILGFVFTL	peptideci
CASSLGRGNEQFF	surface glycoprotein	Influenza	CD8	IGAGICASY,IPIGAGICASY,AIPTNFTISV,AYSNNSIAIPTNF,IPTNFTISV,NSIAIPTNF	NP177	LPRRSGAAGA	peptideci
CASTNTGELFF	surface glycoprotein	M.tuberculosis	CD4	QTNSPRRAR,SPRRARSVA,SYQTQTNSPR,TQTNSPRRAR	NA	NA	peptideci
CASSLSSYNEQFF	surface glycoprotein	Influenza	CD8	ASQSIIAYTM,RSVASQSII,SIIAYTMSL,SQSIIAYTM,VASQSIIAY,AIPTNFTISV,AYSNNSIAIPTNF,IPTNFTISV,NSIAIPTNF	Matrix protein (M1)	GILGFVFTL	peptideci
CASSQDEYEQYF	surface glycoprotein	Influenza	CD8	ASQSIIAYTM,RSVASQSII,SIIAYTMSL,SQSIIAYTM,VASQSIIAY	NP177	LPRRSGAAGA	peptideci
CASSQYNEQFF	surface glycoprotein	M.tuberculosis	CD4	ASQSIIAYTM,RSVASQSII,SIIAYTMSL,SQSIIAYTM,VASQSIIAY	NA	NA	peptideci
CASSLSDTQYF	surface glycoprotein	Influenza	CD8	ASQSIIAYTM,RSVASQSII,SIIAYTMSL,SQSIIAYTM,VASQSIIAY	Matrix protein (M1)	GILGFVFTL	peptideci
CASSSGYNEQFF	surface glycoprotein	Neoantigen		ASQSIIAYTM,RSVASQSII,SIIAYTMSL,SQSIIAYTM,VASQSIIAY	COL18A1-VLL-S8F	VLLGVKLFGV	peptideci
CASSSGYNEQFF	surface glycoprotein	M.tuberculosis	CD4	ASQSIIAYTM,RSVASQSII,SIIAYTMSL,SQSIIAYTM,VASQSIIAY	NA	NA	peptideci
CASSLVAGATDTQYF	surface glycoprotein	Influenza	CD8	ASQSIIAYTM,RSVASQSII,SIIAYTMSL,SQSIIAYTM,VASQSIIAY	Matrix protein (M1)	GILGFVFTL	peptideci
CASSLLGTGELFF	surface glycoprotein	M.tuberculosis	CD4	ASQSIIAYTM,RSVASQSII,SIIAYTMSL,SQSIIAYTM,VASQSIIAY	NA	NA	peptideci
CASSLAGGGTDTQYF	surface glycoprotein	M.tuberculosis	CD4	ASQSIIAYTM,RSVASQSII,SIIAYTMSL,SQSIIAYTM,VASQSIIAY,GRLQSLQTY,LITGRLQSL,RLQSLQTYV	NA	NA	peptideci
CASSLGRGYEQYF	surface glycoprotein	M.tuberculosis	CD4	ASQSIIAYTM,RSVASQSII,SIIAYTMSL,SQSIIAYTM,VASQSIIAY	NA	NA	peptideci
CASSYTGELFF	surface glycoprotein	Influenza	CD8	ASQSIIAYTM,RSVASQSII,SIIAYTMSL,SQSIIAYTM,VASQSIIAY	NP177	LPRRSGAAGA	peptideci
CASSYTGELFF	surface glycoprotein	HCV	CD8	ASQSIIAYTM,RSVASQSII,SIIAYTMSL,SQSIIAYTM,VASQSIIAY	NS3	KLVALGINAV	peptideci
CASSLGGNYEQYF	surface glycoprotein	Influenza	CD8	ASQSIIAYTM,RSVASQSII,SIIAYTMSL,SQSIIAYTM,VASQSIIAY,NLNESLIDL	NP177	LPRRSGAAGA	peptideci
CASSLLAGGGETQYF	surface glycoprotein	M.tuberculosis	CD4	AENSVAYSN,AENSVAYSNN,LGAENSVAY	NA	NA	peptideci
CASSFGVNTGELFF	surface glycoprotein	Influenza	CD8	AIPTNFTISV,AYSNNSIAIPTNF,IPTNFTISV,NSIAIPTNF	NP177	LPRRSGAAGA	peptideci
CASSPGREQYF	surface glycoprotein	M.tuberculosis	CD4	AIPTNFTISV,AYSNNSIAIPTNF,IPTNFTISV,NSIAIPTNF	NA	NA	peptideci
CASSLDPGPNTEAFF	surface glycoprotein	M.tuberculosis	CD4	AIPTNFTISV,AYSNNSIAIPTNF,IPTNFTISV,NSIAIPTNF	NA	NA	peptideci
CASSLGGNTGELFF	surface glycoprotein	Melanoma		AIPTNFTISV,AYSNNSIAIPTNF,IPTNFTISV,NSIAIPTNF	Melan-A/MART-1	ELAGIGILTV	peptideci
CASSLGGNTEAFF	surface glycoprotein	Celiac disease	CD4	AIPTNFTISV,AYSNNSIAIPTNF,IPTNFTISV,NSIAIPTNF,APHGVVFL,APHGVVFLHV,GVVFLHVTY,VVFLHVTYV	NA	NA	peptideci
CASSFGDSYEQYF	surface glycoprotein	YFV		AIPTNFTISV,AYSNNSIAIPTNF,IPTNFTISV,NSIAIPTNF	YFV-LLW	LLWNGPMAV	peptideci
CASSIAGGNEQFF	surface glycoprotein	Diabetes Type 1	CD4	AIPTNFTISV,AYSNNSIAIPTNF,IPTNFTISV,NSIAIPTNF,ERDISTEIYQAGSTPCNGV,LDSKVGGNYNYLYRLFRKS,LPDDFTGCVIAWNSNNLDS,VIAWNSNNLDSKVGGNYNY,YNYLYRLFRKSNLKPFERD	NA	NA	peptideci peptidecii
CASSLSSNEQFF	surface glycoprotein	M.tuberculosis	CD4	AIPTNFTISV,AYSNNSIAIPTNF,IPTNFTISV,NSIAIPTNF	NA	NA	peptideci
CASSPGGREQYF	surface glycoprotein	Influenza	CD8	AIPTNFTISV,AYSNNSIAIPTNF,IPTNFTISV,NSIAIPTNF	NP177	LPRRSGAAGA	peptideci
CASSFGGSSYNEQFF	surface glycoprotein	Influenza	CD8	AIPTNFTISV,AYSNNSIAIPTNF,IPTNFTISV,NSIAIPTNF	NP177	LPRRSGAAGA	peptideci
CASSLAGGSYNEQFF	surface glycoprotein	M.tuberculosis	CD4	AIPTNFTISV,AYSNNSIAIPTNF,IPTNFTISV,NSIAIPTNF	NA	NA	peptideci
CASSLNSGANVLTF	surface glycoprotein	M.tuberculosis	CD4	AIPTNFTISV,AYSNNSIAIPTNF,IPTNFTISV,NSIAIPTNF	NA	NA	peptideci
CASSLNSGTDTQYF	surface glycoprotein	CMV	CD8	AIPTNFTISV,AYSNNSIAIPTNF,IPTNFTISV,NSIAIPTNF	IE-1	CRVLCCYVL	peptideci
CASSLSGTGNTEAFF	surface glycoprotein	EBV	CD8	AIPTNFTISV,AYSNNSIAIPTNF,IPTNFTISV,NSIAIPTNF	BMLF-1	GLCTLVAML	peptideci
CASSLGQNTEAFF	surface glycoprotein	Celiac disease	CD4	FTISVTTEIL,KEIDRLNEV	NA	NA	peptideci
CASSLGQNTEAFF	surface glycoprotein	M.tuberculosis	CD4	FTISVTTEIL,KEIDRLNEV	NA	NA	peptideci
CASSYGGGTYEQYF	surface glycoprotein	Influenza	CD8	FTISVTTEIL	NP177	LPRRSGAAGA	peptideci
CASSSGTGAYEQYF	surface glycoprotein	Neoantigen		LLLQYGSFC,LLQYGSFCT	FLNA-HIA	HIAKSPFEV	peptideci
CASSSGTGAYEQYF	surface glycoprotein	M.tuberculosis	CD4	LLLQYGSFC,LLQYGSFCT	NA	NA	peptideci
CASSQGSYEQYF	surface glycoprotein	HCV	CD8	IYKTPPIKDF,KQIYKTPPIK	NS3	KLVALGINAV	peptideci
CASSFGQGYEQYF	surface glycoprotein	Neoantigen		LLTDEMIAQY,LTDEMIAQY,LTDEMIAQYT,VLPPLLTDEMIAQY	GLRA1-LIF,GNL3L-R4C	LIFNMFYWI,NLNCCSVPV	peptideci
CASSQTGPQPQHF	surface glycoprotein	M.tuberculosis	CD4	LLTDEMIAQY,LTDEMIAQY,LTDEMIAQYT,VLPPLLTDEMIAQY	NA	NA	peptideci
CASSFGTGGYEQYF	surface glycoprotein	Neoantigen	CD8	LLTDEMIAQY,LTDEMIAQY,LTDEMIAQYT,VLPPLLTDEMIAQY	FAM58A-3	IAMAVLYLA	peptideci
CASSFQGGDTEAFF	surface glycoprotein	M.tuberculosis	CD4	LLTDEMIAQY,LTDEMIAQY,LTDEMIAQYT,VLPPLLTDEMIAQY	NA	NA	peptideci
CASSQERGGSYNEQFF	surface glycoprotein	M.tuberculosis	CD8	LLTDEMIAQY,LTDEMIAQY,LTDEMIAQYT,VLPPLLTDEMIAQY	NA	NA	peptideci
CASSQPGQGTYEQYF	surface glycoprotein	M.tuberculosis	CD4	GTITSGWTF	NA	NA	peptideci
CASSLYRGEKLFF	surface glycoprotein	Influenza	CD8	GTITSGWTF	Matrix protein (M1)	GILGFVFTL	peptideci
CASSFGSNYEQYF	surface glycoprotein	M.tuberculosis	CD4	GTITSGWTF	NA	NA	peptideci
CASSLAYEQYF	surface glycoprotein	Neoantigen		AEVQIDRLI,AEVQIDRLIT,VEAEVQIDRL,VQIDRLITGR	PGM5	AVGSHVYSV	peptideci
CASSGWDNEQFF	surface glycoprotein	CMV	CD8	AEVQIDRLI,AEVQIDRLIT,VEAEVQIDRL,VQIDRLITGR	IE-1	CRVLCCYVL	peptideci
CASSLAGGSNQPQHF	surface glycoprotein	Influenza	CD8	AEVQIDRLI,AEVQIDRLIT,VEAEVQIDRL,VQIDRLITGR	M,Matrix protein (M1)	GILGFVFTL	peptideci
CASRPGQGNNEQFF	surface glycoprotein	HIV	CD8	AEVQIDRLI,AEVQIDRLIT,VEAEVQIDRL,VQIDRLITGR	Gag	KRWIILGLNK	peptideci
CASSLGQGTDTQYF	surface glycoprotein	Influenza	CD8	GRLQSLQTY,LITGRLQSL,RLQSLQTYV	NP177	LPRRSGAAGA	peptideci
CASSLGQGTDTQYF	surface glycoprotein	M.tuberculosis	CD4	GRLQSLQTY,LITGRLQSL,RLQSLQTYV	NA	NA	peptideci
CASSLGTGNQPQHF	surface glycoprotein	M.tuberculosis	CD8	GRLQSLQTY,LITGRLQSL,RLQSLQTYV	NA	NA	peptideci
CASSQGTGGYGYTF	surface glycoprotein	Influenza	CD8	GRLQSLQTY,LITGRLQSL,RLQSLQTYV	NP177	LPRRSGAAGA	peptideci
CASSLTGGNTEAFF	surface glycoprotein	Influenza	CD8	GRLQSLQTY,LITGRLQSL,RLQSLQTYV	NP177	LPRRSGAAGA	peptideci
CASSYGTGQETQYF	surface glycoprotein	M.tuberculosis	CD4	GRLQSLQTY,LITGRLQSL,RLQSLQTYV	NA	NA	peptideci
CASSLWNTEAFF	surface glycoprotein	EBV	CD8	GRLQSLQTY,LITGRLQSL,RLQSLQTYV	BMLF-1	GLCTLVAML	peptideci
CASSLGQGNTEAFF	surface glycoprotein	Influenza	CD8	GRLQSLQTY,LITGRLQSL,RLQSLQTYV	NP177	LPRRSGAAGA	peptideci
CASSLGQGNTEAFF	surface glycoprotein	M.tuberculosis	CD4	GRLQSLQTY,LITGRLQSL,RLQSLQTYV	NA	NA	peptideci
CASSAGGGSYNEQFF	surface glycoprotein	CMV	CD8	GRLQSLQTY,LITGRLQSL,RLQSLQTYV	pp65	NLVPMVATV	peptideci
CASSPQGETQYF	surface glycoprotein	M.tuberculosis	CD4	AEIRASANL,AEIRASANLA,ASANLAATK	NA	NA	peptideci
CASSPGGETQYF	surface glycoprotein	M.tuberculosis	CD4	AEIRASANL,AEIRASANLA,ASANLAATK	NA	NA	peptideci
CASSRGETQYF	surface glycoprotein	Influenza	CD8	AEIRASANL,AEIRASANLA,ASANLAATK	NP177	LPRRSGAAGA	peptideci
CASSAGTGVETQYF	surface glycoprotein	M.tuberculosis	CD4	AEIRASANL,AEIRASANLA,ASANLAATK	NA	NA	peptideci
CASSLQGAGANVLTF	surface glycoprotein	M.tuberculosis	CD4	AEIRASANL,AEIRASANLA,ASANLAATK	NA	NA	peptideci
CASSGNEQFF	surface glycoprotein	DENV	CD8	HLMSFPQSA,YHLMSFPQSA			peptideci
CASSLDYNEQFF	surface glycoprotein	Neoantigen		FPQSAPHGV,FPQSAPHGVVF	GNL3L-R4C	NLNCCSVPV	peptideci
CASSLDSYEQYF	surface glycoprotein	HIV	CD8	FPQSAPHGV,FPQSAPHGVVF	Gag,p24 KK10	KRWIILGLNK	peptideci
CASSSGATEAFF	surface glycoprotein	HCV	CD8	FPQSAPHGV,FPQSAPHGVVF	NS3	KLVALGINAV	peptideci
CASSPSSSYNEQFF	surface glycoprotein	M.tuberculosis	CD4	FPQSAPHGV,FPQSAPHGVVF	NA	NA	peptideci
CASSLGVDEQFF	surface glycoprotein	CMV	CD8	FPQSAPHGV,FPQSAPHGVVF	pp50	VTEHDTLLY	peptideci
CASSQGNEQFF	surface glycoprotein	Influenza	CD8	APHGVVFL,APHGVVFLHV,GVVFLHVTY,VVFLHVTYV	Matrix protein (M1)	GILGFVFTL	peptideci
CASSRLAGSTDTQYF	surface glycoprotein	CMV	CD8	APHGVVFL,APHGVVFLHV,GVVFLHVTY,VVFLHVTYV	IE-1	QIKVRVKMV	peptideci
CASSPDGNYGYTF	surface glycoprotein	M.tuberculosis	CD8	APHGVVFL,APHGVVFLHV,GVVFLHVTY,VVFLHVTYV	NA	NA	peptideci
CASSLFGGSSYEQYF	surface glycoprotein	M.tuberculosis	CD4	APHGVVFL,APHGVVFLHV,GVVFLHVTY,VVFLHVTYV	NA	NA	peptideci
CASSQGLGQPQHF	surface glycoprotein	M.tuberculosis	CD4	APHGVVFL,APHGVVFLHV,GVVFLHVTY,VVFLHVTYV	NA	NA	peptideci
CASSPTGITEAFF	surface glycoprotein	CMV	CD8	APHGVVFL,APHGVVFLHV,GVVFLHVTY,VVFLHVTYV	pp65	TPRVTGGGAM	peptideci
CASSLGQGDNEQFF	surface glycoprotein	Influenza	CD8	APHGVVFL,APHGVVFLHV,GVVFLHVTY,VVFLHVTYV	NP177	LPRRSGAAGA	peptideci
CASSQETGSYEQYF	surface glycoprotein	EBV	CD8	RLNEVAKNL	EBNA3A	RPPIFIRRL	peptideci
CASSAGTGAYEQYF	surface glycoprotein	YFV	CD8	NLNESLIDL	YFV-17D	LLWNGPMAV	peptideci
CASSSGTGSYEQYF	surface glycoprotein	M.tuberculosis	CD4	NLNESLIDL	NA	NA	peptideci
CASSLLAGTDTQYF	surface glycoprotein	M.tuberculosis	CD4	NLNESLIDL	NA	NA	peptideci
CASSLLQGARTEAFF	surface glycoprotein	CMV	CD8	LIDLQELGKY,QELGKYEQYI,QELGKYEQYIKW,SLIDLQELGK	pp65	TPRVTGGGAM	peptideci
CASIGVSYEQYF	surface glycoprotein	Neoantigen		QYIKWPWYI,YEQYIKWPW,YEQYIKWPWY	C15orf32-MLS-G9R	MLSILALVRV	peptideci
CASSLNSNQPQHF	surface glycoprotein	M.tuberculosis	CD4	QYIKWPWYI,YEQYIKWPW,YEQYIKWPWY	NA	NA	peptideci
CASSLGGTGELFF	surface glycoprotein	Celiac disease	CD4	QYIKWPWYI,YEQYIKWPW,YEQYIKWPWY	NA	NA	peptideci
CASSTGDTDTQYF	surface glycoprotein	M.tuberculosis	CD4	QYIKWPWYI,YEQYIKWPW,YEQYIKWPWY	NA	NA	peptideci
CASSSSYEQYF	surface glycoprotein	Influenza	CD8	QYIKWPWYI,YEQYIKWPW,YEQYIKWPWY,CMTSCCSCLK,MTSCCSCLK	NP177	LPRRSGAAGA	peptideci
CASSFTGNTEAFF	surface glycoprotein	Influenza	CD8	QYIKWPWYI,YEQYIKWPW,YEQYIKWPWY	NP177	LPRRSGAAGA	peptideci
CASSQGQGNQPQHF	surface glycoprotein	M.tuberculosis	CD4	QYIKWPWYI,YEQYIKWPW,YEQYIKWPWY	NA	NA	peptideci
CASSPGMNTEAFF	surface glycoprotein	M.tuberculosis	CD4	QYIKWPWYI,YEQYIKWPW,YEQYIKWPWY	NA	NA	peptideci
CASSLAGGETQYF	surface glycoprotein	Influenza	CD8	QYIKWPWYI,YEQYIKWPW,YEQYIKWPWY	NP177	LPRRSGAAGA	peptideci
CASSSGSYEQYF	surface glycoprotein	Influenza	CD8	QYIKWPWYI,YEQYIKWPW,YEQYIKWPWY	NP177	LPRRSGAAGA	peptideci
CASSSGSYEQYF	surface glycoprotein	DENV	CD8	QYIKWPWYI,YEQYIKWPW,YEQYIKWPWY			peptideci
CASSLLAGGMDEQFF	surface glycoprotein	HIV	CD4 CD8	QYIKWPWYI,YEQYIKWPW,YEQYIKWPWY	Gag polyprotein RQ13	RFYKTLRAEQASQ	peptideci
CASSLSGTGELFF	surface glycoprotein	HCV	CD8	QYIKWPWYI,YEQYIKWPW,YEQYIKWPWY	NS3	CINGVCWTV	peptideci
CASSLVGGSSYNEQFF	surface glycoprotein	M.tuberculosis	CD4	QYIKWPWYI,YEQYIKWPW,YEQYIKWPWY	NA	NA	peptideci
CASSSDSYNEQFF	surface glycoprotein	Influenza	CD8	QYIKWPWYI,YEQYIKWPW,YEQYIKWPWY	NP177	LPRRSGAAGA	peptideci
CASSLGQGNTGELFF	surface glycoprotein	M.tuberculosis	CD4	QYIKWPWYI,YEQYIKWPW,YEQYIKWPWY	NA	NA	peptideci
CASSLAGNNEQFF	surface glycoprotein	M.tuberculosis	CD4	QYIKWPWYI,YEQYIKWPW,YEQYIKWPWY	NA	NA	peptideci
CASSDGTSSYNEQFF	surface glycoprotein	M.tuberculosis	CD4	FIAGLIAIV	NA	NA	peptideci
CASSLLSGANVLTF	surface glycoprotein	M.tuberculosis	CD4	FIAGLIAIV	NA	NA	peptideci
CASSPQGTGELFF	surface glycoprotein	M.tuberculosis	CD4	FIAGLIAIV	NA	NA	peptideci
CASSTGISYEQYF	surface glycoprotein	Neoantigen		FIAGLIAIV	OR5M3-KMV	KMVAVFYTT	peptideci
CASSLGDEQFF	surface glycoprotein	M.tuberculosis	CD4	SEPVLKGVKL	NA	NA	peptideci
CASSHPDSYEQYF	surface glycoprotein	M.tuberculosis	CD4	SEPVLKGVKL	NA	NA	peptideci
CASSYGSYEQYF	ORF3a	HCV	CD8	DLFMRIFTI,MDLFMRIFTI	NS3	KLVALGINAV	peptideci
CASSYTGELFF	ORF3a	Influenza	CD8	DLFMRIFTI,MDLFMRIFTI	NP177	LPRRSGAAGA	peptideci
CASSYTGELFF	ORF3a	HCV	CD8	DLFMRIFTI,MDLFMRIFTI	NS3	KLVALGINAV	peptideci
CASSLGQGAYEQYF	ORF3a	DENV	CD8	DLFMRIFTI,MDLFMRIFTI			peptideci
CASSLGYTEAFF	ORF3a	HIV	CD8	DLFMRIFTI,MDLFMRIFTI	Gag	TPQDLNTML	peptideci
CASSLGGPYEQYF	ORF3a	EBV	CD8	RIFTIGTVTLK	BMLF-1	GLCTLVAML	peptideci
CASSPGQGNTEAFF	ORF3a	M.tuberculosis	CD4	RIFTIGTVTLK	NA	NA	peptideci
CASSAYNEQFF	ORF3a	YFV	CD8	FVRATATIPI	YFV-17D	LLWNGPMAV	peptideci
CASSLGDEQFF	ORF3a	M.tuberculosis	CD4	FVRATATIPI	NA	NA	peptideci
CASSFGSTDTQYF	ORF3a	Influenza	CD8	FVRATATIPI	Matrix protein (M1)	GILGFVFTL	peptideci
CASSAGQGYEQYF	ORF3a	YFV	CD8	IPIQASLPF	YFV-17D	LLWNGPMAV	peptideci
CASSAGQGYEQYF	ORF3a	Neoantigen		IPIQASLPF	ATP6AP1-KLG-G3W	KLWASPLHV	peptideci
CASSQDPGYEQYF	ORF3a	Influenza	CD8	IPIQASLPF	M,Matrix protein (M1)	GILGFVFTL	peptideci
CASSYPDTQYF	ORF3a	CMV	CD8	IVGVALLAVF,VGVALLAVF	IE-1	CRVLCCYVL	peptideci
CASSQDRGGEQYF	ORF3a	Influenza	CD8	ITLKKRWQL,LKKRWQLAL,TLKKRWQLA,TLKKRWQLAL	NP177	LPRRSGAAGA	peptideci
CASSRSSYEQYF	ORF3a	Diabetes Type 1	CD4	FVCNLLLLFV,LLFVTVYSHL,TVYSHLLLV	NA	NA	peptideci
CASSRSSYEQYF	ORF3a	M.tuberculosis	CD4	FVCNLLLLFV,LLFVTVYSHL,TVYSHLLLV	NA	NA	peptideci
CASSFDTQYF	ORF3a	Influenza	CD8	FVCNLLLLFV,LLFVTVYSHL,TVYSHLLLV	NP177	LPRRSGAAGA	peptideci
CASSAGTGAYEQYF	ORF3a	YFV	CD8	FVCNLLLLFV,LLFVTVYSHL,TVYSHLLLV	YFV-17D	LLWNGPMAV	peptideci
CASSLGGNQPQHF	ORF3a	Influenza	CD8	FVCNLLLLFV,LLFVTVYSHL,TVYSHLLLV	NP177	LPRRSGAAGA	peptideci peptidecii
CASSLGGNQPQHF	ORF3a	Celiac disease	CD4	FVCNLLLLFV,LLFVTVYSHL,TVYSHLLLV	NA	NA	peptideci peptidecii
CASSLGGNQPQHF	ORF3a	Inflammatory bowel disease (IBD)	CD4	FVCNLLLLFV,LLFVTVYSHL,TVYSHLLLV	Flagellin	NA	peptideci peptidecii
CASSLGGNQPQHF	ORF3a	M.tuberculosis	CD4	FVCNLLLLFV,LLFVTVYSHL,TVYSHLLLV	NA	NA	peptideci peptidecii
CASSQADTQYF	ORF3a	M.tuberculosis	CD4	FVCNLLLLFV,LLFVTVYSHL,TVYSHLLLV	NA	NA	peptideci
CASSLGPYNEQFF	ORF3a	M.tuberculosis	CD4	FVCNLLLLFV,LLFVTVYSHL,TVYSHLLLV	NA	NA	peptideci
CSATSGSYEQYF	ORF3a	Influenza	CD8	FVCNLLLLFV,LLFVTVYSHL,TVYSHLLLV	NP177	LPRRSGAAGA	peptideci
CASSSSYEQYF	ORF3a	Influenza	CD8	FVCNLLLLFV,LLFVTVYSHL,TVYSHLLLV	NP177	LPRRSGAAGA	peptideci
CASSPGDTQYF	ORF3a	CMV	CD8	FVCNLLLLFV,LLFVTVYSHL,TVYSHLLLV	IE-1	CRVLCCYVL	peptideci
CASSLEGTDTQYF	ORF3a	M.tuberculosis	CD4	FVCNLLLLFV,LLFVTVYSHL,TVYSHLLLV	NA	NA	peptideci
CASSLGGSYNEQFF	ORF3a	M.tuberculosis	CD4	FVCNLLLLFV,LLFVTVYSHL,TVYSHLLLV	NA	NA	peptideci
CASSLGETQYF	ORF3a	Influenza	CD8	FVCNLLLLFV,LLFVTVYSHL,TVYSHLLLV,LLYDANYFL,LLYDANYFLC,LYDANYFLCW,NPLLYDANY,PLLYDANYFL,YDANYFLCW,SYFTSDYYQL,VLHSYFTSDY,YFTSDYYQLY	NP177	LPRRSGAAGA	peptideci
CASSLGETQYF	ORF3a	M.tuberculosis	CD4	FVCNLLLLFV,LLFVTVYSHL,TVYSHLLLV,LLYDANYFL,LLYDANYFLC,LYDANYFLCW,NPLLYDANY,PLLYDANYFL,YDANYFLCW,SYFTSDYYQL,VLHSYFTSDY,YFTSDYYQLY	NA	NA	peptideci
CASSPGGNTEAFF	ORF3a	M.tuberculosis	CD4	FVCNLLLLFV,LLFVTVYSHL,TVYSHLLLV	NA	NA	peptideci
CASSLYYNEQFF	ORF3a	M.tuberculosis	CD4	FVCNLLLLFV,LLFVTVYSHL,TVYSHLLLV	NA	NA	peptideci
CASSLGLAGVNEQFF	ORF3a	M.tuberculosis	CD4	FLQSINFVR,FLQSINFVRI,FLYLYALVYF,GLEAPFLYLY,INFVRIIMR,LQSINFVRI,LQSINFVRII,QSINFVRII,SINFVRIIMR,VYFLQSINF,VYFLQSINFV,YFLQSINFVR,YLYALVYFL	NA	NA	peptideci
CATSRDRGLTEAFF	ORF3a	Neoantigen		FLQSINFVR,FLQSINFVRI,FLYLYALVYF,GLEAPFLYLY,INFVRIIMR,LQSINFVRI,LQSINFVRII,QSINFVRII,SINFVRIIMR,VYFLQSINF,VYFLQSINFV,YFLQSINFVR,YLYALVYFL	NSDHL-A9V	KLVALGINAV	peptideci
CASGGQNTEAFF	ORF3a	M.tuberculosis	CD4	FLQSINFVR,FLQSINFVRI,FLYLYALVYF,GLEAPFLYLY,INFVRIIMR,LQSINFVRI,LQSINFVRII,QSINFVRII,SINFVRIIMR,VYFLQSINF,VYFLQSINFV,YFLQSINFVR,YLYALVYFL	NA	NA	peptideci
CASSPGLAGTDTQYF	ORF3a	M.tuberculosis	CD8	FLQSINFVR,FLQSINFVRI,FLYLYALVYF,GLEAPFLYLY,INFVRIIMR,LQSINFVRI,LQSINFVRII,QSINFVRII,SINFVRIIMR,VYFLQSINF,VYFLQSINFV,YFLQSINFVR,YLYALVYFL	NA	NA	peptideci
CASRGGNTEAFF	ORF3a	M.tuberculosis	CD4	FLQSINFVR,FLQSINFVRI,FLYLYALVYF,GLEAPFLYLY,INFVRIIMR,LQSINFVRI,LQSINFVRII,QSINFVRII,SINFVRIIMR,VYFLQSINF,VYFLQSINFV,YFLQSINFVR,YLYALVYFL	NA	NA	peptideci
CASSLGGEQFF	ORF3a	CMV	CD8	FLQSINFVR,FLQSINFVRI,FLYLYALVYF,GLEAPFLYLY,INFVRIIMR,LQSINFVRI,LQSINFVRII,QSINFVRII,SINFVRIIMR,VYFLQSINF,VYFLQSINFV,YFLQSINFVR,YLYALVYFL	pp50	VTEHDTLLY	peptideci
CASSLGGEQFF	ORF3a	Influenza	CD8	FLQSINFVR,FLQSINFVRI,FLYLYALVYF,GLEAPFLYLY,INFVRIIMR,LQSINFVRI,LQSINFVRII,QSINFVRII,SINFVRIIMR,VYFLQSINF,VYFLQSINFV,YFLQSINFVR,YLYALVYFL	NP177	LPRRSGAAGA	peptideci
CASFTSSYEQYF	ORF3a	Toxic epidermal necrolysis	CD8	FLQSINFVR,FLQSINFVRI,FLYLYALVYF,GLEAPFLYLY,INFVRIIMR,LQSINFVRI,LQSINFVRII,QSINFVRII,SINFVRIIMR,VYFLQSINF,VYFLQSINFV,YFLQSINFVR,YLYALVYFL	NA	NA	peptideci
CASSVSSYEQYF	ORF3a	Influenza	CD8	FLQSINFVR,FLQSINFVRI,FLYLYALVYF,GLEAPFLYLY,INFVRIIMR,LQSINFVRI,LQSINFVRII,QSINFVRII,SINFVRIIMR,VYFLQSINF,VYFLQSINFV,YFLQSINFVR,YLYALVYFL	NP177	LPRRSGAAGA	peptideci
CASSLTENTEAFF	ORF3a	Celiac disease	CD4	FLQSINFVR,FLQSINFVRI,FLYLYALVYF,GLEAPFLYLY,INFVRIIMR,LQSINFVRI,LQSINFVRII,QSINFVRII,SINFVRIIMR,VYFLQSINF,VYFLQSINFV,YFLQSINFVR,YLYALVYFL	NA	NA	peptideci
CASSFPDTQYF	ORF3a	CMV	CD8	FLQSINFVR,FLQSINFVRI,FLYLYALVYF,GLEAPFLYLY,INFVRIIMR,LQSINFVRI,LQSINFVRII,QSINFVRII,SINFVRIIMR,VYFLQSINF,VYFLQSINFV,YFLQSINFVR,YLYALVYFL	IE-1	CRVLCCYVL	peptideci
CASSLQETQYF	ORF3a	Inflammatory bowel disease (IBD)	CD4	FLQSINFVR,FLQSINFVRI,FLYLYALVYF,GLEAPFLYLY,INFVRIIMR,LQSINFVRI,LQSINFVRII,QSINFVRII,SINFVRIIMR,VYFLQSINF,VYFLQSINFV,YFLQSINFVR,YLYALVYFL	Flagellin	NA	peptideci
CASSSGTSGYNEQFF	ORF3a	M.tuberculosis	CD4	FLQSINFVR,FLQSINFVRI,FLYLYALVYF,GLEAPFLYLY,INFVRIIMR,LQSINFVRI,LQSINFVRII,QSINFVRII,SINFVRIIMR,VYFLQSINF,VYFLQSINFV,YFLQSINFVR,YLYALVYFL	NA	NA	peptideci
CASSSGTSGYEQYF	ORF3a	CMV	CD8	FLQSINFVR,FLQSINFVRI,FLYLYALVYF,GLEAPFLYLY,INFVRIIMR,LQSINFVRI,LQSINFVRII,QSINFVRII,SINFVRIIMR,VYFLQSINF,VYFLQSINFV,YFLQSINFVR,YLYALVYFL	IE1	QIKVRVKMV	peptideci
CASSLSSYNEQFF	ORF3a	Influenza	CD8	FLQSINFVR,FLQSINFVRI,FLYLYALVYF,GLEAPFLYLY,INFVRIIMR,LQSINFVRI,LQSINFVRII,QSINFVRII,SINFVRIIMR,VYFLQSINF,VYFLQSINFV,YFLQSINFVR,YLYALVYFL	Matrix protein (M1)	GILGFVFTL	peptideci
CASSPGGDEQFF	ORF3a	M.tuberculosis	CD4	FLQSINFVR,FLQSINFVRI,FLYLYALVYF,GLEAPFLYLY,INFVRIIMR,LQSINFVRI,LQSINFVRII,QSINFVRII,SINFVRIIMR,VYFLQSINF,VYFLQSINFV,YFLQSINFVR,YLYALVYFL	NA	NA	peptideci
CASSLRDTQYF	ORF3a	M.tuberculosis	CD4	FLQSINFVR,FLQSINFVRI,FLYLYALVYF,GLEAPFLYLY,INFVRIIMR,LQSINFVRI,LQSINFVRII,QSINFVRII,SINFVRIIMR,VYFLQSINF,VYFLQSINFV,YFLQSINFVR,YLYALVYFL	NA	NA	peptideci
CASSLGQGDQPQHF	ORF3a	Melanoma	CD8	FLQSINFVR,FLQSINFVRI,FLYLYALVYF,GLEAPFLYLY,INFVRIIMR,LQSINFVRI,LQSINFVRII,QSINFVRII,SINFVRIIMR,VYFLQSINF,VYFLQSINFV,YFLQSINFVR,YLYALVYFL	Melan-A/MART-1	EAAGIGILTV	peptideci
CASSLVTGTDTQYF	ORF3a	M.tuberculosis	CD4	FLQSINFVR,FLQSINFVRI,FLYLYALVYF,GLEAPFLYLY,INFVRIIMR,LQSINFVRI,LQSINFVRII,QSINFVRII,SINFVRIIMR,VYFLQSINF,VYFLQSINFV,YFLQSINFVR,YLYALVYFL	NA	NA	peptideci
CASSPGGSGNTIYF	ORF3a	M.tuberculosis	CD4	FLQSINFVR,FLQSINFVRI,FLYLYALVYF,GLEAPFLYLY,INFVRIIMR,LQSINFVRI,LQSINFVRII,QSINFVRII,SINFVRIIMR,VYFLQSINF,VYFLQSINFV,YFLQSINFVR,YLYALVYFL	NA	NA	peptideci
CASSLGGEAFF	ORF3a	Celiac disease	CD4	FLQSINFVR,FLQSINFVRI,FLYLYALVYF,GLEAPFLYLY,INFVRIIMR,LQSINFVRI,LQSINFVRII,QSINFVRII,SINFVRIIMR,VYFLQSINF,VYFLQSINFV,YFLQSINFVR,YLYALVYFL	NA	NA	peptideci
CASSFGTGELFF	ORF3a	Influenza	CD8	FLQSINFVR,FLQSINFVRI,FLYLYALVYF,GLEAPFLYLY,INFVRIIMR,LQSINFVRI,LQSINFVRII,QSINFVRII,SINFVRIIMR,VYFLQSINF,VYFLQSINFV,YFLQSINFVR,YLYALVYFL	NP177	LPRRSGAAGA	peptideci
CASSFNNEQFF	ORF3a	EBV	CD8	FLQSINFVR,FLQSINFVRI,FLYLYALVYF,GLEAPFLYLY,INFVRIIMR,LQSINFVRI,LQSINFVRII,QSINFVRII,SINFVRIIMR,VYFLQSINF,VYFLQSINFV,YFLQSINFVR,YLYALVYFL	BMLF-1	GLCTLVAML	peptideci
CASSLAGGTEAFF	ORF3a	Neoantigen		FLQSINFVR,FLQSINFVRI,FLYLYALVYF,GLEAPFLYLY,INFVRIIMR,LQSINFVRI,LQSINFVRII,QSINFVRII,SINFVRIIMR,VYFLQSINF,VYFLQSINFV,YFLQSINFVR,YLYALVYFL,AGLEAPFLYLYALVYFLQS,IIMRLWLCWKCRSKNPLLY,LQSINFVRIIMRLWLCWKC,YLYALVYFLQSINFVRIIM,YSHLLLVAAGLEAPFLYLY	TRPV3-LLL-A8V	LLLNMLIVL	peptideci minigene peptidecii
CASSLAGGTEAFF	ORF3a	M.tuberculosis	CD4	FLQSINFVR,FLQSINFVRI,FLYLYALVYF,GLEAPFLYLY,INFVRIIMR,LQSINFVRI,LQSINFVRII,QSINFVRII,SINFVRIIMR,VYFLQSINF,VYFLQSINFV,YFLQSINFVR,YLYALVYFL,AGLEAPFLYLYALVYFLQS,IIMRLWLCWKCRSKNPLLY,LQSINFVRIIMRLWLCWKC,YLYALVYFLQSINFVRIIM,YSHLLLVAAGLEAPFLYLY	NA	NA	peptideci minigene peptidecii
CASSSGSYGYTF	ORF3a	Influenza	CD8	FLQSINFVR,FLQSINFVRI,FLYLYALVYF,GLEAPFLYLY,INFVRIIMR,LQSINFVRI,LQSINFVRII,QSINFVRII,SINFVRIIMR,VYFLQSINF,VYFLQSINFV,YFLQSINFVR,YLYALVYFL	Matrix protein (M1)	GILGFVFTL	peptideci
CASSPPGGSYNEQFF	ORF3a	Influenza	CD8	FLQSINFVR,FLQSINFVRI,FLYLYALVYF,GLEAPFLYLY,INFVRIIMR,LQSINFVRI,LQSINFVRII,QSINFVRII,SINFVRIIMR,VYFLQSINF,VYFLQSINFV,YFLQSINFVR,YLYALVYFL	NP177	LPRRSGAAGA	peptideci
CASSLGGATEAFF	ORF3a	M.tuberculosis	CD4	FLQSINFVR,FLQSINFVRI,FLYLYALVYF,GLEAPFLYLY,INFVRIIMR,LQSINFVRI,LQSINFVRII,QSINFVRII,SINFVRIIMR,VYFLQSINF,VYFLQSINFV,YFLQSINFVR,YLYALVYFL	NA	NA	peptideci
CASKGTGGSNQPQHF	ORF3a	M.tuberculosis	CD4	FLQSINFVR,FLQSINFVRI,FLYLYALVYF,GLEAPFLYLY,INFVRIIMR,LQSINFVRI,LQSINFVRII,QSINFVRII,SINFVRIIMR,VYFLQSINF,VYFLQSINFV,YFLQSINFVR,YLYALVYFL	NA	NA	peptideci
CASSLVENTEAFF	ORF3a	Influenza	CD8	FLQSINFVR,FLQSINFVRI,FLYLYALVYF,GLEAPFLYLY,INFVRIIMR,LQSINFVRI,LQSINFVRII,QSINFVRII,SINFVRIIMR,VYFLQSINF,VYFLQSINFV,YFLQSINFVR,YLYALVYFL	NP177	LPRRSGAAGA	peptideci
CASSLTDPYEQYF	ORF3a	EBV	CD8	FLQSINFVR,FLQSINFVRI,FLYLYALVYF,GLEAPFLYLY,INFVRIIMR,LQSINFVRI,LQSINFVRII,QSINFVRII,SINFVRIIMR,VYFLQSINF,VYFLQSINFV,YFLQSINFVR,YLYALVYFL	BMLF1,BMLF-1	GLCTLVAML	peptideci
CASSRGLNTEAFF	ORF3a	M.tuberculosis	CD4	FLQSINFVR,FLQSINFVRI,FLYLYALVYF,GLEAPFLYLY,INFVRIIMR,LQSINFVRI,LQSINFVRII,QSINFVRII,SINFVRIIMR,VYFLQSINF,VYFLQSINFV,YFLQSINFVR,YLYALVYFL	NA	NA	peptideci
CASSPLRENTEAFF	ORF3a	Celiac disease	CD4	FLQSINFVR,FLQSINFVRI,FLYLYALVYF,GLEAPFLYLY,INFVRIIMR,LQSINFVRI,LQSINFVRII,QSINFVRII,SINFVRIIMR,VYFLQSINF,VYFLQSINFV,YFLQSINFVR,YLYALVYFL	NA	NA	peptideci
CASSLSNYEQYF	ORF3a	Influenza	CD8	FLQSINFVR,FLQSINFVRI,FLYLYALVYF,GLEAPFLYLY,INFVRIIMR,LQSINFVRI,LQSINFVRII,QSINFVRII,SINFVRIIMR,VYFLQSINF,VYFLQSINFV,YFLQSINFVR,YLYALVYFL	NP177	LPRRSGAAGA	peptideci
CASSSSTDTQYF	ORF3a	Diabetes Type 1	CD4	FLQSINFVR,FLQSINFVRI,FLYLYALVYF,GLEAPFLYLY,INFVRIIMR,LQSINFVRI,LQSINFVRII,QSINFVRII,SINFVRIIMR,VYFLQSINF,VYFLQSINFV,YFLQSINFVR,YLYALVYFL	NA	NA	peptideci
CASSSSTDTQYF	ORF3a	Inflammatory bowel disease (IBD)	CD4	FLQSINFVR,FLQSINFVRI,FLYLYALVYF,GLEAPFLYLY,INFVRIIMR,LQSINFVRI,LQSINFVRII,QSINFVRII,SINFVRIIMR,VYFLQSINF,VYFLQSINFV,YFLQSINFVR,YLYALVYFL	Flagellin	NA	peptideci
CASSLGTDTQYF	ORF3a	Celiac disease	CD4	FLQSINFVR,FLQSINFVRI,FLYLYALVYF,GLEAPFLYLY,INFVRIIMR,LQSINFVRI,LQSINFVRII,QSINFVRII,SINFVRIIMR,VYFLQSINF,VYFLQSINFV,YFLQSINFVR,YLYALVYFL	NA	NA	peptideci
CAISESYEQYF	ORF3a	CMV	CD8	FLQSINFVR,FLQSINFVRI,FLYLYALVYF,GLEAPFLYLY,INFVRIIMR,LQSINFVRI,LQSINFVRII,QSINFVRII,SINFVRIIMR,VYFLQSINF,VYFLQSINFV,YFLQSINFVR,YLYALVYFL	pp65	NLVPMVATV,RPHERNGFTVL	peptideci
CASSVAGELFF	ORF3a	M.tuberculosis	CD4	FLQSINFVR,FLQSINFVRI,FLYLYALVYF,GLEAPFLYLY,INFVRIIMR,LQSINFVRI,LQSINFVRII,QSINFVRII,SINFVRIIMR,VYFLQSINF,VYFLQSINFV,YFLQSINFVR,YLYALVYFL	NA	NA	peptideci
CASSLGDTQYF	ORF3a	Celiac disease	CD4	FLQSINFVR,FLQSINFVRI,FLYLYALVYF,GLEAPFLYLY,INFVRIIMR,LQSINFVRI,LQSINFVRII,QSINFVRII,SINFVRIIMR,VYFLQSINF,VYFLQSINFV,YFLQSINFVR,YLYALVYFL	NA	NA	peptideci peptidecii
CASSLGTGGFYEQYF	ORF3a	M.tuberculosis	CD4	LLYDANYFL,LLYDANYFLC,LYDANYFLCW,NPLLYDANY,PLLYDANYFL,YDANYFLCW	NA	NA	peptideci
CASSLGGTEAFF	ORF3a	Influenza	CD8	LLYDANYFL,LLYDANYFLC,LYDANYFLCW,NPLLYDANY,PLLYDANYFL,YDANYFLCW	NP177	LPRRSGAAGA	peptideci
CASSLGGTEAFF	ORF3a	Celiac disease	CD4	LLYDANYFL,LLYDANYFLC,LYDANYFLCW,NPLLYDANY,PLLYDANYFL,YDANYFLCW	NA	NA	peptideci
CASSLGGTEAFF	ORF3a	Neoantigen		LLYDANYFL,LLYDANYFLC,LYDANYFLCW,NPLLYDANY,PLLYDANYFL,YDANYFLCW	OR5M3-KMV	KMVAVFYTT	peptideci
CATSRDPGSNQPQHF	ORF3a	M.tuberculosis	CD4	LLYDANYFL,LLYDANYFLC,LYDANYFLCW,NPLLYDANY,PLLYDANYFL,YDANYFLCW	NA	NA	peptideci
CASSSGQSYEQYF	ORF3a	Influenza	CD8	LLYDANYFL,LLYDANYFLC,LYDANYFLCW,NPLLYDANY,PLLYDANYFL,YDANYFLCW	NP177	LPRRSGAAGA	peptideci
CASSLQGSNQPQHF	ORF3a	EBV	CD8	LLYDANYFL,LLYDANYFLC,LYDANYFLCW,NPLLYDANY,PLLYDANYFL,YDANYFLCW	BRLF1	YVLDHLIVV	peptideci
CATGTGDSNQPQHF	ORF3a	EBV	CD8	LLYDANYFL,LLYDANYFLC,LYDANYFLCW,NPLLYDANY,PLLYDANYFL,YDANYFLCW	BZLF1,BZLF	EPLPQGQLTAY	peptideci
CATGTGDSNQPQHF	ORF3a	CMV	CD8	LLYDANYFL,LLYDANYFLC,LYDANYFLCW,NPLLYDANY,PLLYDANYFL,YDANYFLCW	pp65	RPHERNGFTVL	peptideci
CASSEQGYEQYF	ORF3a	M.tuberculosis	CD4	LLYDANYFL,LLYDANYFLC,LYDANYFLCW,NPLLYDANY,PLLYDANYFL,YDANYFLCW	NA	NA	peptideci
CASSQGSYEQYF	ORF3a	HCV	CD8	LLYDANYFL,LLYDANYFLC,LYDANYFLCW,NPLLYDANY,PLLYDANYFL,YDANYFLCW	NS3	KLVALGINAV	peptideci
CATSTGDSNQPQHF	ORF3a	EBV	CD8	LLYDANYFL,LLYDANYFLC,LYDANYFLCW,NPLLYDANY,PLLYDANYFL,YDANYFLCW	BZLF1	EPLPQGQLTAY	peptideci
CASSLVGSTDTQYF	ORF3a	M.tuberculosis	CD4	LLYDANYFL,LLYDANYFLC,LYDANYFLCW,NPLLYDANY,PLLYDANYFL,YDANYFLCW	NA	NA	peptideci peptidecii
CASSPRDGQETQYF	ORF3a	Influenza	CD8	IPYNSVTSSI,PYNSVTSSI	Matrix protein (M1)	GILGFVFTL	peptideci
CASSIRSTGELFF	ORF3a	Influenza	CD8	SEHDYQIGGYTEKW,YQIGGYTEK,YQIGGYTEKW	M,Matrix protein (M1)	GILGFVFTL	peptideci
CASSIRSTGELFF	ORF3a	EBV	CD8	SEHDYQIGGYTEKW,YQIGGYTEK,YQIGGYTEKW	BMLF1,BRLF1	GLCTLVAML,YVLDHLIVV	peptideci
CASSVQSTDTQYF	ORF3a	Neoantigen		SEHDYQIGGYTEKW,YQIGGYTEK,YQIGGYTEKW	ITIH6-RLG-G3V	RLVPYLEFL	peptideci
CASSLGQGGSYEQYF	ORF3a	CMV	CD8	SEHDYQIGGYTEKW,YQIGGYTEK,YQIGGYTEKW	pp50	VTEHDTLLY	peptideci
CASSLGQGGSYEQYF	ORF3a	Influenza	CD8	SEHDYQIGGYTEKW,YQIGGYTEK,YQIGGYTEKW	NP177	LPRRSGAAGA	peptideci
CASSLGQGLSYEQYF	ORF3a	Neoantigen		SEHDYQIGGYTEKW,YQIGGYTEK,YQIGGYTEKW	TYR-YMD	YMDGTMSQV	peptideci
CASSAGQGVTYEQYF	ORF3a	HTLV-1	CD8	SEHDYQIGGYTEKW,YQIGGYTEK,YQIGGYTEKW	Tax,Tax-1	SFHSLHLLF	peptideci
CASSPLTDTQYF	ORF3a	EBV	CD8	SEHDYQIGGYTEKW,YQIGGYTEK,YQIGGYTEKW	BZLF1,BMLF-1,BZLF-1	RAKFKQLL	peptideci
CASSLGLGNTGELFF	ORF3a	M.tuberculosis	CD4	SEHDYQIGGYTEKW,YQIGGYTEK,YQIGGYTEKW	NA	NA	peptideci
CASSIGTGIYNEQFF	ORF3a	CMV	CD8	SEHDYQIGGYTEKW,YQIGGYTEK,YQIGGYTEKW	pp65	TPRVTGGGAM	peptideci
CASSPGPLYEQYF	ORF3a	Influenza	CD8	SEHDYQIGGYTEKW,YQIGGYTEK,YQIGGYTEKW	NP177	LPRRSGAAGA	peptideci
CASSVGQGVTYEQYF	ORF3a	CMV	CD8	SEHDYQIGGYTEKW,YQIGGYTEK,YQIGGYTEKW	pp50	VTEHDTLLY	peptideci
CASSLGGNYEQYF	ORF3a	Influenza	CD8	SEHDYQIGGYTEKW,YQIGGYTEK,YQIGGYTEKW	NP177	LPRRSGAAGA	peptideci
CASSARSTGELFF	ORF3a	Influenza	CD8	SEHDYQIGGYTEKW,YQIGGYTEK,YQIGGYTEKW	M,Matrix protein (M1)	GILGFVFTL	peptideci
CASSARSTGELFF	ORF3a	Neoantigen	CD8	SEHDYQIGGYTEKW,YQIGGYTEK,YQIGGYTEKW	Matrix protein (M1)	GILGFVFTL	peptideci
CASSPRDRGYEQYF	ORF3a	Psoriatic arthritis		SEHDYQIGGYTEKW,YQIGGYTEK,YQIGGYTEKW	NA	NA	peptideci
CASSEGGNQPQHF	ORF3a	Influenza	CD8	SEHDYQIGGYTEKW,YQIGGYTEK,YQIGGYTEKW,GVEHVTFFIY,HVTFFIYNK,STDTGVEHVTFFIY,VEHVTFFIY	NP177	LPRRSGAAGA	peptideci
CASSLRNTGELFF	ORF3a	M.tuberculosis	CD4	SEHDYQIGGYTEKW,YQIGGYTEK,YQIGGYTEKW	NA	NA	peptideci peptidecii
CASSFGAGLTYEQYF	ORF3a	Influenza	CD8	SEHDYQIGGYTEKW,YQIGGYTEK,YQIGGYTEKW	NP177	LPRRSGAAGA	peptideci
CASSLRSSYEQYF	ORF3a	Influenza	CD8	SEHDYQIGGYTEKW,YQIGGYTEK,YQIGGYTEKW	M,Matrix protein (M1)	GILGFVFTL	peptideci
CASSLRSSYEQYF	ORF3a	Neoantigen	CD8	SEHDYQIGGYTEKW,YQIGGYTEK,YQIGGYTEKW	FAM58A-2	FQAQHIAMA	peptideci
CASSLGADSQETQYF	ORF3a	M.tuberculosis	CD4	SYFTSDYYQL,VLHSYFTSDY,YFTSDYYQLY	NA	NA	peptideci
CASRPSGYEQYF	ORF3a	M.tuberculosis	CD4	SYFTSDYYQL,VLHSYFTSDY,YFTSDYYQLY	NA	NA	peptideci
CASSLGTSSTDTQYF	ORF3a	Neoantigen		SYFTSDYYQL,VLHSYFTSDY,YFTSDYYQLY	RYR3-VLN-E6K	VLNYFKPYL	peptideci
CASSLVTGTGNTIYF	ORF3a	M.tuberculosis	CD4	SYFTSDYYQL,VLHSYFTSDY,YFTSDYYQLY	NA	NA	peptideci
CASSFGDTQYF	ORF3a	CMV	CD8	SYFTSDYYQL,VLHSYFTSDY,YFTSDYYQLY	IE-1	CRVLCCYVL	peptideci
CASSWGDTQYF	ORF3a	M.tuberculosis	CD4	YYQLYSTQL	NA	NA	peptideci
CASSQVSSTDTQYF	ORF3a	M.tuberculosis	CD4	GVEHVTFFIY,HVTFFIYNK,STDTGVEHVTFFIY,VEHVTFFIY	NA	NA	peptideci
CASSLGGYEQYF	ORF3a	EBV	CD8	GVEHVTFFIY,HVTFFIYNK,STDTGVEHVTFFIY,VEHVTFFIY	BMLF-1	GLCTLVAML	peptideci
CASSLGGYEQYF	ORF3a	Influenza	CD8	GVEHVTFFIY,HVTFFIYNK,STDTGVEHVTFFIY,VEHVTFFIY	NP177	LPRRSGAAGA	peptideci
CASSGNEQFF	ORF3a	DENV	CD8	GVEHVTFFIY,HVTFFIYNK,STDTGVEHVTFFIY,VEHVTFFIY			peptideci
CASSLGGTDTQYF	ORF3a	M.tuberculosis	CD4	GVEHVTFFIY,HVTFFIYNK,STDTGVEHVTFFIY,VEHVTFFIY,EHDYQIGGYTEKWESGVKD,QLYSTQLSTDTGVEHVTFF,SYFTSDYYQLYSTQLSTDT,VKDCVVLHSYFTSDYYQLY,YTEKWESGVKDCVVLHSYF	NA	NA	peptideci peptidecii
CASSVGQGNGYTF	ORF3a	M.tuberculosis	CD4	GVEHVTFFIY,HVTFFIYNK,STDTGVEHVTFFIY,VEHVTFFIY	NA	NA	peptideci
CASSPGDEQFF	ORF3a	Influenza	CD8	GVEHVTFFIY,HVTFFIYNK,STDTGVEHVTFFIY,VEHVTFFIY	NP177	LPRRSGAAGA	peptideci
CASSPGDEQFF	ORF3a	CMV	CD8	GVEHVTFFIY,HVTFFIYNK,STDTGVEHVTFFIY,VEHVTFFIY	IE-1	CRVLCCYVL	peptideci
CASSPDTSYEQYF	ORF3a	CMV	CD8	EEHVQIHTI	pp65	RPHERNGFTVL	peptideci
CASRSGAEAFF	envelope	Influenza	CD8	SEETGTLIV	M,Matrix protein (M1)	GILGFVFTL	peptideci
CASSLGQGDQPQHF	envelope	Melanoma	CD8	SLVKPSFYV	Melan-A/MART-1	EAAGIGILTV	peptideci
CASTSWTDTQYF	envelope	CMV	CD8	SLVKPSFYV	pp65	RPHERNGFTVL	peptideci
CASSGVDGETQYF	membrane glycoprotein	M.tuberculosis	CD4	EELKKLLEQW,KLLEQWNLV,QWNLVIGFLF	NA	NA	peptideci
CASSLDSNQPQHF	membrane glycoprotein	Inflammatory bowel disease (IBD)	CD4	EELKKLLEQW,KLLEQWNLV,QWNLVIGFLF,ATSRTLSYY,ATSRTLSYYK,TSRTLSYYK,TVATSRTLSY	Flagellin	NA	peptideci
CASSEALYEQYF	membrane glycoprotein	YFV		EELKKLLEQW,KLLEQWNLV,QWNLVIGFLF	YFV-LLW	LLWNGPMAV	peptideci
CASSHGGSSYNEQFF	membrane glycoprotein	M.tuberculosis	CD4	EELKKLLEQW,KLLEQWNLV,QWNLVIGFLF	NA	NA	peptideci
CASSLSRNTEAFF	membrane glycoprotein	Influenza	CD8	EELKKLLEQW,KLLEQWNLV,QWNLVIGFLF	NP177	LPRRSGAAGA	peptideci
CASSLGGTYNEQFF	membrane glycoprotein	M.tuberculosis	CD4	WICLLQFAY	NA	NA	peptideci
CASRPGQHTGELFF	membrane glycoprotein	Influenza	CD8	WICLLQFAY	NP	DATYQRTRALVR	peptideci
CASSLAGGGEQYF	membrane glycoprotein	EBV		WICLLQFAY	BRLF-1	YVLDHLIVV	peptideci
CASSSGTENTGELFF	membrane glycoprotein	M.tuberculosis	CD4	WICLLQFAY	NA	NA	peptideci
CASSLGGASYEQYF	membrane glycoprotein	YFV	CD8	WICLLQFAY	YFV-17D	LLWNGPMAV	peptideci
CASSDTGGNQPQHF	membrane glycoprotein	EBV	CD8	WICLLQFAY	EBNA3B	VSFIEFVGW	peptideci
CASSQGLNTEAFF	membrane glycoprotein	Celiac disease	CD4	FAYANRNRF,LQFAYANRNR,YANRNRFLY	NA	NA	peptideci
CASSQGLNTEAFF	membrane glycoprotein	M.tuberculosis	CD4	FAYANRNRF,LQFAYANRNR,YANRNRFLY	NA	NA	peptideci
CASSDSYEQYF	membrane glycoprotein	YFV		FAYANRNRF,LQFAYANRNR,YANRNRFLY	YFV-LLW	LLWNGPMAV	peptideci
CASSDSYEQYF	membrane glycoprotein	Melanoma		FAYANRNRF,LQFAYANRNR,YANRNRFLY	Melan-A/MART-1	ELAGIGILTV	peptideci
CASSDSYEQYF	membrane glycoprotein	M.tuberculosis	CD8	FAYANRNRF,LQFAYANRNR,YANRNRFLY	NA	NA	peptideci
CASSSGLNSYEQYF	membrane glycoprotein	M.tuberculosis	CD4	FAYANRNRF,LQFAYANRNR,YANRNRFLY	NA	NA	peptideci
CASSLWSGGADTQYF	membrane glycoprotein	HIV	CD8	FAYANRNRF,LQFAYANRNR,YANRNRFLY	Protein Vpr	FPRPWLHGL	peptideci
CASSIFHTDTQYF	membrane glycoprotein	Influenza	CD8	FAYANRNRF,LQFAYANRNR,YANRNRFLY	M	GILGFVFTL	peptideci
CASRLQGGNTEAFF	membrane glycoprotein	CMV	CD8	FAYANRNRF,LQFAYANRNR,YANRNRFLY	IE2	NEGVKAAW	peptideci
CASSSTGGYGYTF	membrane glycoprotein	M.tuberculosis	CD4	FLYIIKLIFL,FLYIIKLVFL,LYIIKLIFL,LYIIKLIFLW,RFLYIIKLIF,YIIKLIFLW,YIIKLIFLWL	NA	NA	peptideci
CASSPGYEQYF	membrane glycoprotein	EBV	CD8	FLYIIKLIFL,FLYIIKLVFL,LYIIKLIFL,LYIIKLIFLW,RFLYIIKLIF,YIIKLIFLW,YIIKLIFLWL	BMLF-1	GLCTLVAML	peptideci
CASSLGGTGELFF	membrane glycoprotein	Celiac disease	CD4	FLYIIKLIFL,FLYIIKLVFL,LYIIKLIFL,LYIIKLIFLW,RFLYIIKLIF,YIIKLIFLW,YIIKLIFLWL	NA	NA	peptideci
CASSLGGNEQFF	membrane glycoprotein	Celiac disease	CD4	FLYIIKLIFL,FLYIIKLVFL,LYIIKLIFL,LYIIKLIFLW,RFLYIIKLIF,YIIKLIFLW,YIIKLIFLWL,SELVIGAVI,SELVIGAVIL	NA	NA	peptideci peptidecii
CASSLGGNEQFF	membrane glycoprotein	M.tuberculosis	CD4	FLYIIKLIFL,FLYIIKLVFL,LYIIKLIFL,LYIIKLIFLW,RFLYIIKLIF,YIIKLIFLW,YIIKLIFLWL,SELVIGAVI,SELVIGAVIL	NA	NA	peptideci peptidecii
CASSPGGDEQFF	membrane glycoprotein	M.tuberculosis	CD4	FLYIIKLIFL,FLYIIKLVFL,LYIIKLIFL,LYIIKLIFLW,RFLYIIKLIF,YIIKLIFLW,YIIKLIFLWL	NA	NA	peptideci
CASSSTGTGVYEQYF	membrane glycoprotein	M.tuberculosis	CD8	FLYIIKLIFL,FLYIIKLVFL,LYIIKLIFL,LYIIKLIFLW,RFLYIIKLIF,YIIKLIFLW,YIIKLIFLWL	NA	NA	peptideci
CASSQTGSTDTQYF	membrane glycoprotein	Influenza	CD8	FLYIIKLIFL,FLYIIKLVFL,LYIIKLIFL,LYIIKLIFLW,RFLYIIKLIF,YIIKLIFLW,YIIKLIFLWL	Matrix protein (M1)	GILGFVFTL	peptideci
CASSQTGSTDTQYF	membrane glycoprotein	M.tuberculosis	CD4	FLYIIKLIFL,FLYIIKLVFL,LYIIKLIFL,LYIIKLIFLW,RFLYIIKLIF,YIIKLIFLW,YIIKLIFLWL	NA	NA	peptideci
CASSLGTGGGEQYF	membrane glycoprotein	M.tuberculosis	CD4	FLYIIKLIFL,FLYIIKLVFL,LYIIKLIFL,LYIIKLIFLW,RFLYIIKLIF,YIIKLIFLW,YIIKLIFLWL	NA	NA	peptideci
CASSEYNEQFF	membrane glycoprotein	M.tuberculosis	CD4	FLYIIKLIFL,FLYIIKLVFL,LYIIKLIFL,LYIIKLIFLW,RFLYIIKLIF,YIIKLIFLW,YIIKLIFLWL	NA	NA	peptideci
CASSGGDEQFF	membrane glycoprotein	M.tuberculosis	CD4	FLYIIKLIFL,FLYIIKLVFL,LYIIKLIFL,LYIIKLIFLW,RFLYIIKLIF,YIIKLIFLW,YIIKLIFLWL	NA	NA	peptideci
CASSLGYGTEAFF	membrane glycoprotein	CMV	CD8	FLYIIKLIFL,FLYIIKLVFL,LYIIKLIFL,LYIIKLIFLW,RFLYIIKLIF,YIIKLIFLW,YIIKLIFLWL	pp50	VTEHDTLLY	peptideci
CASSLGYGTEAFF	membrane glycoprotein	Influenza	CD8	FLYIIKLIFL,FLYIIKLVFL,LYIIKLIFL,LYIIKLIFLW,RFLYIIKLIF,YIIKLIFLW,YIIKLIFLWL	NP177	LPRRSGAAGA	peptideci
CASSLGQGYNEQFF	membrane glycoprotein	Neoantigen		FLYIIKLIFL,FLYIIKLVFL,LYIIKLIFL,LYIIKLIFLW,RFLYIIKLIF,YIIKLIFLW,YIIKLIFLWL	APBB2-VQY-L7F	VQYLGMFPV	peptideci
CASSLGTEAFF	membrane glycoprotein	Influenza	CD8	FLYIIKLIFL,FLYIIKLVFL,LYIIKLIFL,LYIIKLIFLW,RFLYIIKLIF,YIIKLIFLW,YIIKLIFLWL,FLWLLWPVT,FLWLLWPVTL,LWLLWPVTL,LWPVTLACF,TLACFVLAAV,WLLWPVTLA,WPVTLACFVL	NP177	LPRRSGAAGA	peptideci
CASSLEGEQYF	membrane glycoprotein	HCV		FLYIIKLIFL,FLYIIKLVFL,LYIIKLIFL,LYIIKLIFLW,RFLYIIKLIF,YIIKLIFLW,YIIKLIFLWL	HCV-KLV	KLVALGINAV	peptideci
CASSQSNEQFF	membrane glycoprotein	M.tuberculosis	CD4	FLWLLWPVT,FLWLLWPVTL,LWLLWPVTL,LWPVTLACF,TLACFVLAAV,WLLWPVTLA,WPVTLACFVL	NA	NA	peptideci
CASSLTDTQYF	membrane glycoprotein	Breast Cancer	CD8	FLWLLWPVT,FLWLLWPVTL,LWLLWPVTL,LWPVTLACF,TLACFVLAAV,WLLWPVTLA,WPVTLACFVL	NA	NA	peptideci
CASSLTDTQYF	membrane glycoprotein	CMV	CD8	FLWLLWPVT,FLWLLWPVTL,LWLLWPVTL,LWPVTLACF,TLACFVLAAV,WLLWPVTLA,WPVTLACFVL	pp50	VTEHDTLLY	peptideci
CASSLTDTQYF	membrane glycoprotein	Influenza	CD8	FLWLLWPVT,FLWLLWPVTL,LWLLWPVTL,LWPVTLACF,TLACFVLAAV,WLLWPVTLA,WPVTLACFVL	NP177	LPRRSGAAGA	peptideci
CASSLAQGQPQHF	membrane glycoprotein	HCV	CD8	FLWLLWPVT,FLWLLWPVTL,LWLLWPVTL,LWPVTLACF,TLACFVLAAV,WLLWPVTLA,WPVTLACFVL	NS3	KLVALGINAV	peptideci
CASSLVMNTEAFF	membrane glycoprotein	M.tuberculosis	CD4	FLWLLWPVT,FLWLLWPVTL,LWLLWPVTL,LWPVTLACF,TLACFVLAAV,WLLWPVTLA,WPVTLACFVL	NA	NA	peptideci
CASSFGGNEQYF	membrane glycoprotein	EBV	CD8	FLWLLWPVT,FLWLLWPVTL,LWLLWPVTL,LWPVTLACF,TLACFVLAAV,WLLWPVTLA,WPVTLACFVL	BMLF-1	GLCTLVAML	peptideci
CASSLTGNTEAFF	membrane glycoprotein	M.tuberculosis	CD4	FLWLLWPVT,FLWLLWPVTL,LWLLWPVTL,LWPVTLACF,TLACFVLAAV,WLLWPVTLA,WPVTLACFVL	NA	NA	peptideci
CASSLTGNTEAFF	membrane glycoprotein	HIV	CD8	FLWLLWPVT,FLWLLWPVTL,LWLLWPVTL,LWPVTLACF,TLACFVLAAV,WLLWPVTLA,WPVTLACFVL	Pol	TAFTIPSI	peptideci
CASSSGTPNEQFF	membrane glycoprotein	M.tuberculosis	CD8	FLWLLWPVT,FLWLLWPVTL,LWLLWPVTL,LWPVTLACF,TLACFVLAAV,WLLWPVTLA,WPVTLACFVL	NA	NA	peptideci
CASSPNNEQFF	membrane glycoprotein	M.tuberculosis	CD4	FLWLLWPVT,FLWLLWPVTL,LWLLWPVTL,LWPVTLACF,TLACFVLAAV,WLLWPVTLA,WPVTLACFVL	NA	NA	peptideci
CSVGTGGTEAFF	membrane glycoprotein	M.tuberculosis	CD4	FLWLLWPVT,FLWLLWPVTL,LWLLWPVTL,LWPVTLACF,TLACFVLAAV,WLLWPVTLA,WPVTLACFVL	NA	NA	peptideci
CASRGGNTEAFF	membrane glycoprotein	M.tuberculosis	CD4	FLWLLWPVT,FLWLLWPVTL,LWLLWPVTL,LWPVTLACF,TLACFVLAAV,WLLWPVTLA,WPVTLACFVL	NA	NA	peptideci
CASSWTANQPQHF	membrane glycoprotein	Diabetes Type 1	CD4	FLWLLWPVT,FLWLLWPVTL,LWLLWPVTL,LWPVTLACF,TLACFVLAAV,WLLWPVTLA,WPVTLACFVL	NA	NA	peptideci
CASSFTDTQYF	membrane glycoprotein	CMV	CD8	FLWLLWPVT,FLWLLWPVTL,LWLLWPVTL,LWPVTLACF,TLACFVLAAV,WLLWPVTLA,WPVTLACFVL	IE-1	CRVLCCYVL	peptideci
CASSFTDTQYF	membrane glycoprotein	M.tuberculosis	CD4	FLWLLWPVT,FLWLLWPVTL,LWLLWPVTL,LWPVTLACF,TLACFVLAAV,WLLWPVTLA,WPVTLACFVL	NA	NA	peptideci
CASSLGQGNTEAFF	membrane glycoprotein	Influenza	CD8	FLWLLWPVT,FLWLLWPVTL,LWLLWPVTL,LWPVTLACF,TLACFVLAAV,WLLWPVTLA,WPVTLACFVL	NP177	LPRRSGAAGA	peptideci
CASSLGQGNTEAFF	membrane glycoprotein	M.tuberculosis	CD4	FLWLLWPVT,FLWLLWPVTL,LWLLWPVTL,LWPVTLACF,TLACFVLAAV,WLLWPVTLA,WPVTLACFVL	NA	NA	peptideci
CASSFGDTQYF	membrane glycoprotein	CMV	CD8	FLWLLWPVT,FLWLLWPVTL,LWLLWPVTL,LWPVTLACF,TLACFVLAAV,WLLWPVTLA,WPVTLACFVL	IE-1	CRVLCCYVL	peptideci
CASSLHNEQFF	membrane glycoprotein	EBV	CD8	FLWLLWPVT,FLWLLWPVTL,LWLLWPVTL,LWPVTLACF,TLACFVLAAV,WLLWPVTLA,WPVTLACFVL	BMLF-1	GLCTLVAML	peptideci
CASSLGQAYEQYF	membrane glycoprotein	EBV	CD8	FLWLLWPVT,FLWLLWPVTL,LWLLWPVTL,LWPVTLACF,TLACFVLAAV,WLLWPVTLA,WPVTLACFVL	EBNA3A,EBNA-6,EBNA-3A,BMLF-1	FLRGRAYGL,EENLLDFVRF,GLCTLVAML	peptideci
CASSLANTEAFF	membrane glycoprotein	M.tuberculosis	CD4	FLWLLWPVT,FLWLLWPVTL,LWLLWPVTL,LWPVTLACF,TLACFVLAAV,WLLWPVTLA,WPVTLACFVL,ASQRVAGDSGFAAY,DSGFAAYSR,VAGDSGFAAY	NA	NA	peptideci
CASSLASDTQYF	membrane glycoprotein	HIV	CD8	FLWLLWPVT,FLWLLWPVTL,LWLLWPVTL,LWPVTLACF,TLACFVLAAV,WLLWPVTLA,WPVTLACFVL	Protein Nef	TPGPGVRYPL	peptideci
CASSLGETQYF	membrane glycoprotein	Influenza	CD8	FLWLLWPVT,FLWLLWPVTL,LWLLWPVTL,LWPVTLACF,TLACFVLAAV,WLLWPVTLA,WPVTLACFVL	NP177	LPRRSGAAGA	peptideci
CASSLGETQYF	membrane glycoprotein	M.tuberculosis	CD4	FLWLLWPVT,FLWLLWPVTL,LWLLWPVTL,LWPVTLACF,TLACFVLAAV,WLLWPVTLA,WPVTLACFVL	NA	NA	peptideci
CASSLKLNTEAFF	membrane glycoprotein	YFV	CD8	FLWLLWPVT,FLWLLWPVTL,LWLLWPVTL,LWPVTLACF,TLACFVLAAV,WLLWPVTLA,WPVTLACFVL	YFV-17D	LLWNGPMAV	peptideci
CASSEGQGYEQYF	membrane glycoprotein	Neoantigen		FLWLLWPVT,FLWLLWPVTL,LWLLWPVTL,LWPVTLACF,TLACFVLAAV,WLLWPVTLA,WPVTLACFVL	TEAD1-VLE-L8F	VLENFTIFLV	peptideci
CASSAQGNTIYF	membrane glycoprotein	M.tuberculosis	CD4	FLWLLWPVT,FLWLLWPVTL,LWLLWPVTL,LWPVTLACF,TLACFVLAAV,WLLWPVTLA,WPVTLACFVL	NA	NA	peptideci
CASSQDSYEQYF	membrane glycoprotein	CMV	CD8	FLWLLWPVT,FLWLLWPVTL,LWLLWPVTL,LWPVTLACF,TLACFVLAAV,WLLWPVTLA,WPVTLACFVL	pp65	RPHERNGFTVL	peptideci
CASSLVGTGELFF	membrane glycoprotein	Influenza	CD8	FLWLLWPVT,FLWLLWPVTL,LWLLWPVTL,LWPVTLACF,TLACFVLAAV,WLLWPVTLA,WPVTLACFVL	Matrix protein (M1)	GILGFVFTL	peptideci
CASSLVGTGELFF	membrane glycoprotein	CMV	CD8	FLWLLWPVT,FLWLLWPVTL,LWLLWPVTL,LWPVTLACF,TLACFVLAAV,WLLWPVTLA,WPVTLACFVL	pp65	NLVPMVATV	peptideci
CASSWGPEAFF	membrane glycoprotein	EBV	CD8	FLWLLWPVT,FLWLLWPVTL,LWLLWPVTL,LWPVTLACF,TLACFVLAAV,WLLWPVTLA,WPVTLACFVL	EBNA3A	FLRGRAYGL	peptideci
CASSLGTGELFF	membrane glycoprotein	CMV	CD8	FLWLLWPVT,FLWLLWPVTL,LWLLWPVTL,LWPVTLACF,TLACFVLAAV,WLLWPVTLA,WPVTLACFVL,SELVIGAVI,SELVIGAVIL	pp65	NLVPMVATV	peptideci peptidecii
CASSPGQGYEQYF	membrane glycoprotein	Neoantigen		FLWLLWPVT,FLWLLWPVTL,LWLLWPVTL,LWPVTLACF,TLACFVLAAV,WLLWPVTLA,WPVTLACFVL	ATP6AP1-KLG-G3W,OR1G1-FLF	KLWASPLHV,FLFMYLVTV	peptideci
CASSLGSSYEQYF	membrane glycoprotein	Melanoma		FLWLLWPVT,FLWLLWPVTL,LWLLWPVTL,LWPVTLACF,TLACFVLAAV,WLLWPVTLA,WPVTLACFVL,SELVIGAVI,SELVIGAVIL	gp100	YLEPGPVTA	peptideci
CASSLGSSYEQYF	membrane glycoprotein	M.tuberculosis	CD4	FLWLLWPVT,FLWLLWPVTL,LWLLWPVTL,LWPVTLACF,TLACFVLAAV,WLLWPVTLA,WPVTLACFVL,SELVIGAVI,SELVIGAVIL	NA	NA	peptideci
CASSPGTGYEQYF	membrane glycoprotein	Neoantigen		FLWLLWPVT,FLWLLWPVTL,LWLLWPVTL,LWPVTLACF,TLACFVLAAV,WLLWPVTLA,WPVTLACFVL	ATP6AP1-KLG-G3W	KLWASPLHV	peptideci
CASSQVQGAYEQYF	membrane glycoprotein	CMV	CD8	FLWLLWPVT,FLWLLWPVTL,LWLLWPVTL,LWPVTLACF,TLACFVLAAV,WLLWPVTLA,WPVTLACFVL	pp50	VTEHDTLLY	peptideci
CASSQVQGAYEQYF	membrane glycoprotein	Influenza	CD8	FLWLLWPVT,FLWLLWPVTL,LWLLWPVTL,LWPVTLACF,TLACFVLAAV,WLLWPVTLA,WPVTLACFVL	NP177	LPRRSGAAGA	peptideci
CASSSTGNTEAFF	membrane glycoprotein	M.tuberculosis	CD4	FLWLLWPVT,FLWLLWPVTL,LWLLWPVTL,LWPVTLACF,TLACFVLAAV,WLLWPVTLA,WPVTLACFVL	NA	NA	peptideci
CASSLGEKLFF	membrane glycoprotein	HCV	CD8	FLWLLWPVT,FLWLLWPVTL,LWLLWPVTL,LWPVTLACF,TLACFVLAAV,WLLWPVTLA,WPVTLACFVL	NS3	KLVALGINAV	peptideci
CASSLGGEQFF	membrane glycoprotein	CMV	CD8	FLWLLWPVT,FLWLLWPVTL,LWLLWPVTL,LWPVTLACF,TLACFVLAAV,WLLWPVTLA,WPVTLACFVL	pp50	VTEHDTLLY	peptideci
CASSLGGEQFF	membrane glycoprotein	Influenza	CD8	FLWLLWPVT,FLWLLWPVTL,LWLLWPVTL,LWPVTLACF,TLACFVLAAV,WLLWPVTLA,WPVTLACFVL	NP177	LPRRSGAAGA	peptideci
CASSLSGPYNEQFF	membrane glycoprotein	Influenza	CD8	FLWLLWPVT,FLWLLWPVTL,LWLLWPVTL,LWPVTLACF,TLACFVLAAV,WLLWPVTLA,WPVTLACFVL	NP177	LPRRSGAAGA	peptideci
CASSFLSSYNEQFF	membrane glycoprotein	Neoantigen		FLWLLWPVT,FLWLLWPVTL,LWLLWPVTL,LWPVTLACF,TLACFVLAAV,WLLWPVTLA,WPVTLACFVL	KAT6A-KLS	KLSREIMPV	peptideci
CASSFSYEQYF	membrane glycoprotein	Celiac disease	CD4	FLWLLWPVT,FLWLLWPVTL,LWLLWPVTL,LWPVTLACF,TLACFVLAAV,WLLWPVTLA,WPVTLACFVL	NA	NA	peptideci
CASSFSYEQYF	membrane glycoprotein	M.tuberculosis	CD4	FLWLLWPVT,FLWLLWPVTL,LWLLWPVTL,LWPVTLACF,TLACFVLAAV,WLLWPVTLA,WPVTLACFVL	NA	NA	peptideci
CASSFGGYEQYF	membrane glycoprotein	HCV		FLWLLWPVT,FLWLLWPVTL,LWLLWPVTL,LWPVTLACF,TLACFVLAAV,WLLWPVTLA,WPVTLACFVL	HCV-KLV	KLVALGINAV	peptideci
CASSPGQLQETQYF	membrane glycoprotein	CMV	CD8	FLWLLWPVT,FLWLLWPVTL,LWLLWPVTL,LWPVTLACF,TLACFVLAAV,WLLWPVTLA,WPVTLACFVL	pp65	NLVPMVATV	peptideci
CASSYSEGYEQYF	membrane glycoprotein	EBV	CD8	FLWLLWPVT,FLWLLWPVTL,LWLLWPVTL,LWPVTLACF,TLACFVLAAV,WLLWPVTLA,WPVTLACFVL	BMLF-1	GLCTLVAML	peptideci
CASSAGGSYEQYF	membrane glycoprotein	CMV	CD8	FLWLLWPVT,FLWLLWPVTL,LWLLWPVTL,LWPVTLACF,TLACFVLAAV,WLLWPVTLA,WPVTLACFVL	IE-1	CRVLCCYVL	peptideci
CASSSGYGYTF	membrane glycoprotein	Influenza	CD8	FLWLLWPVT,FLWLLWPVTL,LWLLWPVTL,LWPVTLACF,TLACFVLAAV,WLLWPVTLA,WPVTLACFVL	NP177	LPRRSGAAGA	peptideci
CASSLYSNQPQHF	membrane glycoprotein	Influenza	CD8	FLWLLWPVT,FLWLLWPVTL,LWLLWPVTL,LWPVTLACF,TLACFVLAAV,WLLWPVTLA,WPVTLACFVL	Matrix protein (M1)	GILGFVFTL	peptideci
CASSLYSNQPQHF	membrane glycoprotein	M.tuberculosis	CD4	FLWLLWPVT,FLWLLWPVTL,LWLLWPVTL,LWPVTLACF,TLACFVLAAV,WLLWPVTLA,WPVTLACFVL	NA	NA	peptideci
CASSLGDTQYF	membrane glycoprotein	Celiac disease	CD4	FLWLLWPVT,FLWLLWPVTL,LWLLWPVTL,LWPVTLACF,TLACFVLAAV,WLLWPVTLA,WPVTLACFVL,GRCDIKDLPKEITVATSRT,LRIAGHHLGRCDIKDLPKE,PKEITVATSRTLSYYKLGA,SRTLSYYKLGASQRVAGDS	NA	NA	peptideci peptidecii
CASSVSDTQYF	membrane glycoprotein	M.tuberculosis	CD8	FLWLLWPVT,FLWLLWPVTL,LWLLWPVTL,LWPVTLACF,TLACFVLAAV,WLLWPVTLA,WPVTLACFVL,GVYYHKNNK,VPLHGTIL,YYHKNNKSW	NA	NA	peptideci
CASSPGPYEQYF	membrane glycoprotein	Neoantigen		FLWLLWPVT,FLWLLWPVTL,LWLLWPVTL,LWPVTLACF,TLACFVLAAV,WLLWPVTLA,WPVTLACFVL	AGL-GLI	QLIPCMDVV	peptideci
CASSPGPYEQYF	membrane glycoprotein	Psoriatic arthritis		FLWLLWPVT,FLWLLWPVTL,LWLLWPVTL,LWPVTLACF,TLACFVLAAV,WLLWPVTLA,WPVTLACFVL	NA	NA	peptideci
CASSPGRYNEQFF	membrane glycoprotein	M.tuberculosis	CD4	FLWLLWPVT,FLWLLWPVTL,LWLLWPVTL,LWPVTLACF,TLACFVLAAV,WLLWPVTLA,WPVTLACFVL	NA	NA	peptideci
CASSEGSYYEQYF	membrane glycoprotein	HIV	CD4	FLWLLWPVT,FLWLLWPVTL,LWLLWPVTL,LWPVTLACF,TLACFVLAAV,WLLWPVTLA,WPVTLACFVL	Gag	FRDYVDRFYKTLRAEQASQE	peptideci
CASSLSVYEQYF	membrane glycoprotein	Influenza	CD8	FLWLLWPVT,FLWLLWPVTL,LWLLWPVTL,LWPVTLACF,TLACFVLAAV,WLLWPVTLA,WPVTLACFVL	NP177	LPRRSGAAGA	peptideci
CASSLAGYEQYF	membrane glycoprotein	CMV	CD8	FLWLLWPVT,FLWLLWPVTL,LWLLWPVTL,LWPVTLACF,TLACFVLAAV,WLLWPVTLA,WPVTLACFVL	pp65	NLVPMVATV	peptideci
CASSAGGNTIYF	membrane glycoprotein	Neoantigen		FLWLLWPVT,FLWLLWPVTL,LWLLWPVTL,LWPVTLACF,TLACFVLAAV,WLLWPVTLA,WPVTLACFVL	TRPV4-FMI-A6T	FMIGYTSAL	peptideci
CASSEGYEQYF	membrane glycoprotein	M.tuberculosis	CD4	FLWLLWPVT,FLWLLWPVTL,LWLLWPVTL,LWPVTLACF,TLACFVLAAV,WLLWPVTLA,WPVTLACFVL	NA	NA	peptideci
CASSLGEAFF	membrane glycoprotein	Influenza	CD8	FLWLLWPVT,FLWLLWPVTL,LWLLWPVTL,LWPVTLACF,TLACFVLAAV,WLLWPVTLA,WPVTLACFVL	NP177	LPRRSGAAGA	peptideci
CASSFGGTEAFF	membrane glycoprotein	Influenza	CD8	FLWLLWPVT,FLWLLWPVTL,LWLLWPVTL,LWPVTLACF,TLACFVLAAV,WLLWPVTLA,WPVTLACFVL	NP177	LPRRSGAAGA	peptideci
CASSQGGGYTF	membrane glycoprotein	M.tuberculosis	CD4	FLWLLWPVT,FLWLLWPVTL,LWLLWPVTL,LWPVTLACF,TLACFVLAAV,WLLWPVTLA,WPVTLACFVL	NA	NA	peptideci
CASSPGTGGTEAFF	membrane glycoprotein	M.tuberculosis	CD4	FLWLLWPVT,FLWLLWPVTL,LWLLWPVTL,LWPVTLACF,TLACFVLAAV,WLLWPVTLA,WPVTLACFVL	NA	NA	peptideci
CASSPLRETQYF	membrane glycoprotein	M.tuberculosis	CD4	FLWLLWPVT,FLWLLWPVTL,LWLLWPVTL,LWPVTLACF,TLACFVLAAV,WLLWPVTLA,WPVTLACFVL	NA	NA	peptideci
CASSSSYEQYF	membrane glycoprotein	Influenza	CD8	FLWLLWPVT,FLWLLWPVTL,LWLLWPVTL,LWPVTLACF,TLACFVLAAV,WLLWPVTLA,WPVTLACFVL	NP177	LPRRSGAAGA	peptideci
CASSPGEGGTDTQYF	membrane glycoprotein	M.tuberculosis	CD8	FLWLLWPVT,FLWLLWPVTL,LWLLWPVTL,LWPVTLACF,TLACFVLAAV,WLLWPVTLA,WPVTLACFVL	NA	NA	peptideci
CASSLGGEETQYF	membrane glycoprotein	EBV	CD8	FLWLLWPVT,FLWLLWPVTL,LWLLWPVTL,LWPVTLACF,TLACFVLAAV,WLLWPVTLA,WPVTLACFVL	BMLF-1	GLCTLVAML	peptideci
CASSLQGSGTEAFF	membrane glycoprotein	M.tuberculosis	CD4	FLWLLWPVT,FLWLLWPVTL,LWLLWPVTL,LWPVTLACF,TLACFVLAAV,WLLWPVTLA,WPVTLACFVL	NA	NA	peptideci
CASRLNTEAFF	membrane glycoprotein	M.tuberculosis	CD4	FLWLLWPVT,FLWLLWPVTL,LWLLWPVTL,LWPVTLACF,TLACFVLAAV,WLLWPVTLA,WPVTLACFVL	NA	NA	peptideci
CASSEGSEAFF	membrane glycoprotein	Neoantigen		FLWLLWPVT,FLWLLWPVTL,LWLLWPVTL,LWPVTLACF,TLACFVLAAV,WLLWPVTLA,WPVTLACFVL	VN1R2-LML-L3F	LMFWASSSI	peptideci
CASSLGGDEQYF	membrane glycoprotein	Neoantigen		FLWLLWPVT,FLWLLWPVTL,LWLLWPVTL,LWPVTLACF,TLACFVLAAV,WLLWPVTLA,WPVTLACFVL	LCP1-NLF	NLFNRYPAL	peptideci
CASSLGDEQFF	membrane glycoprotein	M.tuberculosis	CD4	FLWLLWPVT,FLWLLWPVTL,LWLLWPVTL,LWPVTLACF,TLACFVLAAV,WLLWPVTLA,WPVTLACFVL	NA	NA	peptideci
CASSLGYEQYF	membrane glycoprotein	Influenza	CD8	FLWLLWPVT,FLWLLWPVTL,LWLLWPVTL,LWPVTLACF,TLACFVLAAV,WLLWPVTLA,WPVTLACFVL	NP177	LPRRSGAAGA	peptideci
CASSLGYEQYF	membrane glycoprotein	Celiac disease	CD4	FLWLLWPVT,FLWLLWPVTL,LWLLWPVTL,LWPVTLACF,TLACFVLAAV,WLLWPVTLA,WPVTLACFVL	NA	NA	peptideci
CASSLGYEQYF	membrane glycoprotein	M.tuberculosis	CD4	FLWLLWPVT,FLWLLWPVTL,LWLLWPVTL,LWPVTLACF,TLACFVLAAV,WLLWPVTLA,WPVTLACFVL	NA	NA	peptideci
CASSLTSGNEQFF	membrane glycoprotein	Influenza	CD8	FLWLLWPVT,FLWLLWPVTL,LWLLWPVTL,LWPVTLACF,TLACFVLAAV,WLLWPVTLA,WPVTLACFVL	Matrix protein (M1)	GILGFVFTL	peptideci
CASSLTSGNEQFF	membrane glycoprotein	CMV	CD8	FLWLLWPVT,FLWLLWPVTL,LWLLWPVTL,LWPVTLACF,TLACFVLAAV,WLLWPVTLA,WPVTLACFVL	UL29/28	FRCPRRFCF	peptideci
CASSPDTSYEQYF	membrane glycoprotein	CMV	CD8	FLWLLWPVT,FLWLLWPVTL,LWLLWPVTL,LWPVTLACF,TLACFVLAAV,WLLWPVTLA,WPVTLACFVL	pp65	RPHERNGFTVL	peptideci
CASSSGQGYEQYF	membrane glycoprotein	Influenza	CD8	FLWLLWPVT,FLWLLWPVTL,LWLLWPVTL,LWPVTLACF,TLACFVLAAV,WLLWPVTLA,WPVTLACFVL	NP177	LPRRSGAAGA	peptideci
CASSEGYGYTF	membrane glycoprotein	Diabetes Type 1	CD4	FLWLLWPVT,FLWLLWPVTL,LWLLWPVTL,LWPVTLACF,TLACFVLAAV,WLLWPVTLA,WPVTLACFVL	NA	NA	peptideci
CASSYGDTQYF	membrane glycoprotein	Influenza	CD8	FLWLLWPVT,FLWLLWPVTL,LWLLWPVTL,LWPVTLACF,TLACFVLAAV,WLLWPVTLA,WPVTLACFVL	NP177	LPRRSGAAGA	peptideci
CASSRGFEQYF	membrane glycoprotein	M.tuberculosis	CD4	FLWLLWPVT,FLWLLWPVTL,LWLLWPVTL,LWPVTLACF,TLACFVLAAV,WLLWPVTLA,WPVTLACFVL	NA	NA	peptideci
CASSFSGAYEQYF	membrane glycoprotein	M.tuberculosis	CD4	FLWLLWPVT,FLWLLWPVTL,LWLLWPVTL,LWPVTLACF,TLACFVLAAV,WLLWPVTLA,WPVTLACFVL	NA	NA	peptideci
CASSPVLGSTEAFF	membrane glycoprotein	Influenza	CD8	FLWLLWPVT,FLWLLWPVTL,LWLLWPVTL,LWPVTLACF,TLACFVLAAV,WLLWPVTLA,WPVTLACFVL	Matrix protein (M1)	GILGFVFTL	peptideci
CASSLGLAGTYEQYF	membrane glycoprotein	M.tuberculosis	CD4	FLWLLWPVT,FLWLLWPVTL,LWLLWPVTL,LWPVTLACF,TLACFVLAAV,WLLWPVTLA,WPVTLACFVL	NA	NA	peptideci
CASSLGNGNTIYF	membrane glycoprotein	Influenza	CD4	FLWLLWPVT,FLWLLWPVTL,LWLLWPVTL,LWPVTLACF,TLACFVLAAV,WLLWPVTLA,WPVTLACFVL	HA	PKYVKQNTLKLAT	peptideci
CASSFPGGQETQYF	membrane glycoprotein	M.tuberculosis	CD4	FLWLLWPVT,FLWLLWPVTL,LWLLWPVTL,LWPVTLACF,TLACFVLAAV,WLLWPVTLA,WPVTLACFVL	NA	NA	peptideci
CASSPGLAGTDTQYF	membrane glycoprotein	M.tuberculosis	CD8	FLWLLWPVT,FLWLLWPVTL,LWLLWPVTL,LWPVTLACF,TLACFVLAAV,WLLWPVTLA,WPVTLACFVL	NA	NA	peptideci
CASSPDLSSGNTIYF	membrane glycoprotein	CMV	CD8	FLWLLWPVT,FLWLLWPVTL,LWLLWPVTL,LWPVTLACF,TLACFVLAAV,WLLWPVTLA,WPVTLACFVL	UL29/28	FRCPRRFCF	peptideci
CASSYSSSYNSPLHF	membrane glycoprotein	M.tuberculosis	CD4	FLWLLWPVT,FLWLLWPVTL,LWLLWPVTL,LWPVTLACF,TLACFVLAAV,WLLWPVTLA,WPVTLACFVL	NA	NA	peptideci
CASSSSGGSTDTQYF	membrane glycoprotein	M.tuberculosis	CD4	FLWLLWPVT,FLWLLWPVTL,LWLLWPVTL,LWPVTLACF,TLACFVLAAV,WLLWPVTLA,WPVTLACFVL	NA	NA	peptideci
CASSLTNEQFF	membrane glycoprotein	CMV	CD8	FLWLLWPVT,FLWLLWPVTL,LWLLWPVTL,LWPVTLACF,TLACFVLAAV,WLLWPVTLA,WPVTLACFVL	pp65	NLVPMVATV	peptideci
CASSYSLTGNTEAFF	membrane glycoprotein	CMV	CD8	FLWLLWPVT,FLWLLWPVTL,LWLLWPVTL,LWPVTLACF,TLACFVLAAV,WLLWPVTLA,WPVTLACFVL	IE-1	CRVLCCYVL	peptideci
CAISESNEQFF	membrane glycoprotein	M.tuberculosis	CD4	FLWLLWPVT,FLWLLWPVTL,LWLLWPVTL,LWPVTLACF,TLACFVLAAV,WLLWPVTLA,WPVTLACFVL	NA	NA	peptideci
CASSLGQGAYEQYF	membrane glycoprotein	DENV	CD8	FLWLLWPVT,FLWLLWPVTL,LWLLWPVTL,LWPVTLACF,TLACFVLAAV,WLLWPVTLA,WPVTLACFVL			peptideci
CASSFDSYEQYF	membrane glycoprotein	Influenza	CD8	FLWLLWPVT,FLWLLWPVTL,LWLLWPVTL,LWPVTLACF,TLACFVLAAV,WLLWPVTLA,WPVTLACFVL	NP177	LPRRSGAAGA	peptideci
CASSFDSYEQYF	membrane glycoprotein	HIV	CD8	FLWLLWPVT,FLWLLWPVTL,LWLLWPVTL,LWPVTLACF,TLACFVLAAV,WLLWPVTLA,WPVTLACFVL	Gag	KRWIILGLNK	peptideci
CASSEGNEQFF	membrane glycoprotein	M.tuberculosis	CD4	FLWLLWPVT,FLWLLWPVTL,LWLLWPVTL,LWPVTLACF,TLACFVLAAV,WLLWPVTLA,WPVTLACFVL	NA	NA	peptideci
CASSFNNEQFF	membrane glycoprotein	EBV	CD8	FLWLLWPVT,FLWLLWPVTL,LWLLWPVTL,LWPVTLACF,TLACFVLAAV,WLLWPVTLA,WPVTLACFVL	BMLF-1	GLCTLVAML	peptideci
CASSLGVETQYF	membrane glycoprotein	M.tuberculosis	CD4	FLWLLWPVT,FLWLLWPVTL,LWLLWPVTL,LWPVTLACF,TLACFVLAAV,WLLWPVTLA,WPVTLACFVL	NA	NA	peptideci
CASSQGNEQFF	membrane glycoprotein	Influenza	CD8	FLWLLWPVT,FLWLLWPVTL,LWLLWPVTL,LWPVTLACF,TLACFVLAAV,WLLWPVTLA,WPVTLACFVL	Matrix protein (M1)	GILGFVFTL	peptideci
CASSLGGATEAFF	membrane glycoprotein	M.tuberculosis	CD4	FLWLLWPVT,FLWLLWPVTL,LWLLWPVTL,LWPVTLACF,TLACFVLAAV,WLLWPVTLA,WPVTLACFVL	NA	NA	peptideci
CASSLGQGGSYEQYF	membrane glycoprotein	CMV	CD8	FLWLLWPVT,FLWLLWPVTL,LWLLWPVTL,LWPVTLACF,TLACFVLAAV,WLLWPVTLA,WPVTLACFVL	pp50	VTEHDTLLY	peptideci
CASSLGQGGSYEQYF	membrane glycoprotein	Influenza	CD8	FLWLLWPVT,FLWLLWPVTL,LWLLWPVTL,LWPVTLACF,TLACFVLAAV,WLLWPVTLA,WPVTLACFVL	NP177	LPRRSGAAGA	peptideci
CASSLLGNTEAFF	membrane glycoprotein	Neoantigen		FLWLLWPVT,FLWLLWPVTL,LWLLWPVTL,LWPVTLACF,TLACFVLAAV,WLLWPVTLA,WPVTLACFVL	DRIP-MLY	MLYQHLLPL	peptideci
CASSPVGNEQFF	membrane glycoprotein	M.tuberculosis	CD4	FLWLLWPVT,FLWLLWPVTL,LWLLWPVTL,LWPVTLACF,TLACFVLAAV,WLLWPVTLA,WPVTLACFVL	NA	NA	peptideci
CASSLWGEQYF	membrane glycoprotein	M.tuberculosis	CD4	FLWLLWPVT,FLWLLWPVTL,LWLLWPVTL,LWPVTLACF,TLACFVLAAV,WLLWPVTLA,WPVTLACFVL	NA	NA	peptideci
CASSPGRGNTEAFF	membrane glycoprotein	M.tuberculosis	CD4	FLWLLWPVT,FLWLLWPVTL,LWLLWPVTL,LWPVTLACF,TLACFVLAAV,WLLWPVTLA,WPVTLACFVL	NA	NA	peptideci
CASSFTGNTEAFF	membrane glycoprotein	Influenza	CD8	FLWLLWPVT,FLWLLWPVTL,LWLLWPVTL,LWPVTLACF,TLACFVLAAV,WLLWPVTLA,WPVTLACFVL	NP177	LPRRSGAAGA	peptideci
CASSLAPGYEQYF	membrane glycoprotein	Influenza	CD8	FLWLLWPVT,FLWLLWPVTL,LWLLWPVTL,LWPVTLACF,TLACFVLAAV,WLLWPVTLA,WPVTLACFVL	NP177	LPRRSGAAGA	peptideci
CASSFETEAFF	membrane glycoprotein	Influenza	CD8	FLWLLWPVT,FLWLLWPVTL,LWLLWPVTL,LWPVTLACF,TLACFVLAAV,WLLWPVTLA,WPVTLACFVL	NP177	LPRRSGAAGA	peptideci
CASSRLAGGTDTQYF	membrane glycoprotein	HIV	CD4 CD8	FLWLLWPVT,FLWLLWPVTL,LWLLWPVTL,LWPVTLACF,TLACFVLAAV,WLLWPVTLA,WPVTLACFVL	Gag polyprotein RQ13	RFYKTLRAEQASQ	peptideci
CASSRLAGGTDTQYF	membrane glycoprotein	CMV	CD8	FLWLLWPVT,FLWLLWPVTL,LWLLWPVTL,LWPVTLACF,TLACFVLAAV,WLLWPVTLA,WPVTLACFVL	IE1	QIKVRVDMV	peptideci
CASSHGSYEQYF	membrane glycoprotein	Influenza	CD8	FLWLLWPVT,FLWLLWPVTL,LWLLWPVTL,LWPVTLACF,TLACFVLAAV,WLLWPVTLA,WPVTLACFVL	NP177	LPRRSGAAGA	peptideci
CASSLAMNTEAFF	membrane glycoprotein	M.tuberculosis	CD4	FLWLLWPVT,FLWLLWPVTL,LWLLWPVTL,LWPVTLACF,TLACFVLAAV,WLLWPVTLA,WPVTLACFVL	NA	NA	peptideci
CASSYPGELFF	membrane glycoprotein	CMV	CD8	FLWLLWPVT,FLWLLWPVTL,LWLLWPVTL,LWPVTLACF,TLACFVLAAV,WLLWPVTLA,WPVTLACFVL	IE-1	CRVLCCYVL	peptideci
CASSLVLYEQYF	membrane glycoprotein	Influenza	CD8	FLWLLWPVT,FLWLLWPVTL,LWLLWPVTL,LWPVTLACF,TLACFVLAAV,WLLWPVTLA,WPVTLACFVL	NP177	LPRRSGAAGA	peptideci
CASSTNRGQETQYF	membrane glycoprotein	M.tuberculosis	CD4	FLWLLWPVT,FLWLLWPVTL,LWLLWPVTL,LWPVTLACF,TLACFVLAAV,WLLWPVTLA,WPVTLACFVL	NA	NA	peptideci
CASSYSGDEQYF	membrane glycoprotein	M.tuberculosis	CD4	FLWLLWPVT,FLWLLWPVTL,LWLLWPVTL,LWPVTLACF,TLACFVLAAV,WLLWPVTLA,WPVTLACFVL	NA	NA	peptideci
CASSLTRYEQYF	membrane glycoprotein	Influenza	CD8	FLWLLWPVT,FLWLLWPVTL,LWLLWPVTL,LWPVTLACF,TLACFVLAAV,WLLWPVTLA,WPVTLACFVL	NP177	LPRRSGAAGA	peptideci
CASSLGGYEQYF	membrane glycoprotein	EBV	CD8	FLWLLWPVT,FLWLLWPVTL,LWLLWPVTL,LWPVTLACF,TLACFVLAAV,WLLWPVTLA,WPVTLACFVL	BMLF-1	GLCTLVAML	peptideci
CASSLGGYEQYF	membrane glycoprotein	Influenza	CD8	FLWLLWPVT,FLWLLWPVTL,LWLLWPVTL,LWPVTLACF,TLACFVLAAV,WLLWPVTLA,WPVTLACFVL	NP177	LPRRSGAAGA	peptideci
CASSYRGSGNTIYF	membrane glycoprotein	HCV	CD8	FLWLLWPVT,FLWLLWPVTL,LWLLWPVTL,LWPVTLACF,TLACFVLAAV,WLLWPVTLA,WPVTLACFVL	NS3	KLVALGINAV	peptideci peptidecii
CASSLAGGYTF	membrane glycoprotein	HIV	CD8	FLWLLWPVT,FLWLLWPVTL,LWLLWPVTL,LWPVTLACF,TLACFVLAAV,WLLWPVTLA,WPVTLACFVL	Gag p24	KAFSPEVIPMF	peptideci
CASSLGYGYTF	membrane glycoprotein	HIV	CD8	FLWLLWPVT,FLWLLWPVTL,LWLLWPVTL,LWPVTLACF,TLACFVLAAV,WLLWPVTLA,WPVTLACFVL	Gag,Gag polyprotein	QASQEVKNW	peptideci
CASSPQGETQYF	membrane glycoprotein	M.tuberculosis	CD4	FLWLLWPVT,FLWLLWPVTL,LWLLWPVTL,LWPVTLACF,TLACFVLAAV,WLLWPVTLA,WPVTLACFVL	NA	NA	peptideci
CASSLEGETQYF	membrane glycoprotein	Influenza	CD8	LAAVYRINWI	Matrix protein (M1)	GILGFVFTL	peptideci
CASSLEGETQYF	membrane glycoprotein	CMV	CD8	LAAVYRINWI	pp65	NLVPMVATV	peptideci
CASSYSETYEQYF	membrane glycoprotein	M.tuberculosis	CD8	AIAMACLVGL,IAMACLVGLM	NA	NA	peptideci
CASSLTGGDGYTF	membrane glycoprotein	M.tuberculosis	CD4	FIASFRLFA,SYFIASFRLF,YFIASFRLF,YFIASFRLFA	NA	NA	peptideci
CASSPTSGGYEQYF	membrane glycoprotein	EBV	CD8	FIASFRLFA,SYFIASFRLF,YFIASFRLF,YFIASFRLFA	BMLF-1	GLCTLVAML	peptideci
CASSPTSGGYEQYF	membrane glycoprotein	Neoantigen		FIASFRLFA,SYFIASFRLF,YFIASFRLF,YFIASFRLFA	CHD8-KLN	KLNTITPVV	peptideci
CASSLYSDTQYF	membrane glycoprotein	EBV	CD8	FIASFRLFA,SYFIASFRLF,YFIASFRLF,YFIASFRLFA	BRLF1,BRLF-1	YVLDHLIVV	peptideci
CASSLGGGQPQHF	membrane glycoprotein	M.tuberculosis	CD4	FIASFRLFA,SYFIASFRLF,YFIASFRLF,YFIASFRLFA	NA	NA	peptideci
CASSPGTGAYEQYF	membrane glycoprotein	YFV	CD8	FIASFRLFA,SYFIASFRLF,YFIASFRLF,YFIASFRLFA	YFV-17D	LLWNGPMAV	peptideci
CASTDTGELFF	membrane glycoprotein	Neoantigen		FIASFRLFA,SYFIASFRLF,YFIASFRLF,YFIASFRLFA	AKAP13-Q8K	KLMNIQQQL	peptideci
CASSLGAEQYF	membrane glycoprotein	Neoantigen		FIASFRLFA,SYFIASFRLF,YFIASFRLF,YFIASFRLFA	MRM1	LLFGMTPCL	peptideci
CASSLGISYEQYF	membrane glycoprotein	Neoantigen		FIASFRLFA,SYFIASFRLF,YFIASFRLF,YFIASFRLFA	GNL3L-R4C	NLNCCSVPV	peptideci
CASSLAGGSYNEQFF	membrane glycoprotein	M.tuberculosis	CD4	FIASFRLFA,SYFIASFRLF,YFIASFRLF,YFIASFRLFA	NA	NA	peptideci
CASSLGGLTDTQYF	membrane glycoprotein	Neoantigen		MWSFNPETNI,SFNPETNIL,SMWSFNPET	FNDC3B	VVLSWAPPV	peptideci
CASSLGGLTDTQYF	membrane glycoprotein	M.tuberculosis	CD4	MWSFNPETNI,SFNPETNIL,SMWSFNPET	NA	NA	peptideci
CASSLSSYNEQFF	membrane glycoprotein	Influenza	CD8	MWSFNPETNI,SFNPETNIL,SMWSFNPET	Matrix protein (M1)	GILGFVFTL	peptideci
CASSWGGGEQYF	membrane glycoprotein	HCV	CD8	MWSFNPETNI,SFNPETNIL,SMWSFNPET	NS3	KLVALGINAV	peptideci
CASSTGTAYGYTF	membrane glycoprotein	M.tuberculosis	CD4	MWSFNPETNI,SFNPETNIL,SMWSFNPET	NA	NA	peptideci
CASSFGGITDTQYF	membrane glycoprotein	CMV	CD8	MWSFNPETNI,SFNPETNIL,SMWSFNPET	pp65	TPRVTGGGAM	peptideci
CASSFSGTAYGYTF	membrane glycoprotein	Influenza	CD8	MWSFNPETNI,SFNPETNIL,SMWSFNPET	NP177	LPRRSGAAGA	peptideci
CASSLLGEQFF	membrane glycoprotein	M.tuberculosis	CD4	MWSFNPETNI,SFNPETNIL,SMWSFNPET	NA	NA	peptideci
CASSLGGLPYEQYF	membrane glycoprotein	M.tuberculosis	CD4	MWSFNPETNI,SFNPETNIL,SMWSFNPET	NA	NA	peptideci
CASSFLAGGITDTQYF	membrane glycoprotein	HIV	CD8	SELVIGAVI,SELVIGAVIL	Gag	SLYNTVATL	peptideci
CASSLGGSYEQYF	membrane glycoprotein	Influenza	CD8	SELVIGAVI,SELVIGAVIL	NP177	LPRRSGAAGA	peptideci
CASSPEGNTEAFF	membrane glycoprotein	M.tuberculosis	CD4	SELVIGAVI,SELVIGAVIL	NA	NA	peptideci
CASSPGLATDTQYF	membrane glycoprotein	M.tuberculosis	CD4	SELVIGAVI,SELVIGAVIL	NA	NA	peptideci
CASSLGTDTQYF	membrane glycoprotein	Celiac disease	CD4	SELVIGAVI,SELVIGAVIL	NA	NA	peptideci
CASSVGNTEAFF	membrane glycoprotein	Neoantigen		SELVIGAVI,SELVIGAVIL	GALC-YVV-V3L	YVLTWIVGA	peptideci
CASSLEGGTEAFF	membrane glycoprotein	M.tuberculosis	CD4	SELVIGAVI,SELVIGAVIL	NA	NA	peptideci
CASRQGPYEQYF	membrane glycoprotein	HIV	CD8	SELVIGAVI,SELVIGAVIL	Gag	TPQDLNTML	peptideci
CASSLGSYEQYF	membrane glycoprotein	DENV	CD8	SELVIGAVI,SELVIGAVIL			peptideci
CASSLTDSYEQYF	membrane glycoprotein	EBV	CD8	SELVIGAVI,SELVIGAVIL	BMLF-1	GLCTLVAML	peptideci
CASSSIYEQYF	membrane glycoprotein	M.tuberculosis	CD4	SELVIGAVI,SELVIGAVIL	NA	NA	peptideci
CASSLGGTYEQYF	membrane glycoprotein	EBV	CD8	SELVIGAVI,SELVIGAVIL	BMLF-1	GLCTLVAML	peptideci
CASSLGNTEAFF	membrane glycoprotein	Neoantigen		SELVIGAVI,SELVIGAVIL	SEC24A	FLYNPLTRV	peptideci
CASSLGNTEAFF	membrane glycoprotein	EBV	CD8	SELVIGAVI,SELVIGAVIL	BMLF1	GLCTLVAML	peptideci
CASSIGGSSYNEQFF	membrane glycoprotein	M.tuberculosis	CD4	SELVIGAVI,SELVIGAVIL	NA	NA	peptideci
CASSYEGTEAFF	membrane glycoprotein	Influenza	CD4	SELVIGAVI,SELVIGAVIL	HA	PKYVKQNTLKLAT	peptideci
CASSLSYEQYF	membrane glycoprotein	Influenza	CD8	SELVIGAVI,SELVIGAVIL	NP177	LPRRSGAAGA	peptideci peptidecii
CASSLSYEQYF	membrane glycoprotein	Neoantigen		SELVIGAVI,SELVIGAVIL	PIGN-FLT-P7H	FLTVFSHFM	peptideci peptidecii
CASSLSYEQYF	membrane glycoprotein	M.tuberculosis	CD4	SELVIGAVI,SELVIGAVIL	NA	NA	peptideci peptidecii
CASSLSSATGELFF	membrane glycoprotein	EBV	CD8	SELVIGAVI,SELVIGAVIL	EBNA4	AVFDRKSDAK	peptideci
CASSSSAGGTDTQYF	membrane glycoprotein	M.tuberculosis	CD4	SELVIGAVI,SELVIGAVIL	NA	NA	peptideci
CASSLGTGEQYF	membrane glycoprotein	EBV	CD8	SELVIGAVI,SELVIGAVIL	BMLF-1	GLCTLVAML	peptideci
CASSLGTGEQYF	membrane glycoprotein	Influenza	CD8	SELVIGAVI,SELVIGAVIL	NP177	LPRRSGAAGA	peptideci
CASSSGSYGYTF	membrane glycoprotein	Influenza	CD8	HLRIAGHHL,RIAGHHLGR	Matrix protein (M1)	GILGFVFTL	peptideci
CASSAGSYGYTF	membrane glycoprotein	Influenza	CD8	HLRIAGHHL,RIAGHHLGR	Matrix protein (M1)	GILGFVFTL	peptideci
CASSFFPGELFF	membrane glycoprotein	Neoantigen		ATSRTLSYY,ATSRTLSYYK,TSRTLSYYK,TVATSRTLSY	C3orf58-LMV	LMVLHSPSL	peptideci
CASSPLTDTQYF	membrane glycoprotein	EBV	CD8	ATSRTLSYY,ATSRTLSYYK,TSRTLSYYK,TVATSRTLSY	BZLF1,BMLF-1,BZLF-1	RAKFKQLL	peptideci
CASSLTGFNEQFF	membrane glycoprotein	M.tuberculosis	CD4	ATSRTLSYY,ATSRTLSYYK,TSRTLSYYK,TVATSRTLSY	NA	NA	peptideci
CASSSLAGELFF	membrane glycoprotein	CMV	CD8	ASQRVAGDSGFAAY,DSGFAAYSR,VAGDSGFAAY	pp65	TPRVTGGGAM	peptideci
CASSLGVNTEAFF	ORF6	Influenza	CD8	HLVDFQVTI	NP	DATYQRTRALVR	peptideci peptidecii
CASSQGLNTEAFF	ORF6	Celiac disease	CD4	HLVDFQVTI	NA	NA	peptideci
CASSQGLNTEAFF	ORF6	M.tuberculosis	CD4	HLVDFQVTI	NA	NA	peptideci
CASSLGQNTEAFF	ORF6	Celiac disease	CD4	HLVDFQVTI	NA	NA	peptideci
CASSLGQNTEAFF	ORF6	M.tuberculosis	CD4	HLVDFQVTI	NA	NA	peptideci
CASKRDSYNEQFF	ORF6	M.tuberculosis	CD4	VTIAEILLI	NA	NA	peptideci
CASSISGGSYEQYF	ORF6	Neoantigen		VTIAEILLI	ITIH6-RLG	RLGPYLEFL	peptideci
CASSLAGGGYEQYF	ORF6	Influenza	CD8	VTIAEILLI	NP177	LPRRSGAAGA	peptideci
CASSVEGSSYNEQFF	ORF6	Neoantigen		VTIAEILLI	VN1R2-LML-L3F	LMFWASSSI	peptideci
CASSLDSYNEQFF	ORF6	Influenza	CD8	FKVSIWNLDY,ILLIIMRTFK,IMRTFKVSI,KVSIWNLDY,KVSIWNLDYI,LIIMRTFKV,RTFKVSIWNL,SIWNLDYII,TFKVSIWNL,VSIWNLDYII	NP177	LPRRSGAAGA	peptideci
CASSQDRGNEQFF	ORF6	Neoantigen		FKVSIWNLDY,ILLIIMRTFK,IMRTFKVSI,KVSIWNLDY,KVSIWNLDYI,LIIMRTFKV,RTFKVSIWNL,SIWNLDYII,TFKVSIWNL,VSIWNLDYII	WDR46-T3I	FLIYLDVSV	peptideci
CASSFGTGGYEQYF	ORF6	Neoantigen	CD8	FKVSIWNLDY,ILLIIMRTFK,IMRTFKVSI,KVSIWNLDY,KVSIWNLDYI,LIIMRTFKV,RTFKVSIWNL,SIWNLDYII,TFKVSIWNL,VSIWNLDYII	FAM58A-3	IAMAVLYLA	peptideci
CASSGTGGTEAFF	ORF6	M.tuberculosis	CD4	FKVSIWNLDY,ILLIIMRTFK,IMRTFKVSI,KVSIWNLDY,KVSIWNLDYI,LIIMRTFKV,RTFKVSIWNL,SIWNLDYII,TFKVSIWNL,VSIWNLDYII	NA	NA	peptideci
CASSQDRGGSYEQYF	ORF6	M.tuberculosis	CD8	FKVSIWNLDY,ILLIIMRTFK,IMRTFKVSI,KVSIWNLDY,KVSIWNLDYI,LIIMRTFKV,RTFKVSIWNL,SIWNLDYII,TFKVSIWNL,VSIWNLDYII	NA	NA	peptideci
CASSDQGPDTQYF	ORF6	CMV	CD8	FKVSIWNLDY,ILLIIMRTFK,IMRTFKVSI,KVSIWNLDY,KVSIWNLDYI,LIIMRTFKV,RTFKVSIWNL,SIWNLDYII,TFKVSIWNL,VSIWNLDYII	pp65	RPHERNGFTVL	peptideci
CASSQETGSYEQYF	ORF6	EBV	CD8	FKVSIWNLDY,ILLIIMRTFK,IMRTFKVSI,KVSIWNLDY,KVSIWNLDYI,LIIMRTFKV,RTFKVSIWNL,SIWNLDYII,TFKVSIWNL,VSIWNLDYII	EBNA3A	RPPIFIRRL	peptideci
CASSDSYGYTF	ORF6	HCV	CD8	FKVSIWNLDY,ILLIIMRTFK,IMRTFKVSI,KVSIWNLDY,KVSIWNLDYI,LIIMRTFKV,RTFKVSIWNL,SIWNLDYII,TFKVSIWNL,VSIWNLDYII	NS3	KLVALGINAV	peptideci minigene
CASSLGGTDTQYF	ORF6	M.tuberculosis	CD4	FKVSIWNLDY,ILLIIMRTFK,IMRTFKVSI,KVSIWNLDY,KVSIWNLDYI,LIIMRTFKV,RTFKVSIWNL,SIWNLDYII,TFKVSIWNL,VSIWNLDYII	NA	NA	peptideci peptidecii
CASSLVENTEAFF	ORF6	Influenza	CD8	FKVSIWNLDY,ILLIIMRTFK,IMRTFKVSI,KVSIWNLDY,KVSIWNLDYI,LIIMRTFKV,RTFKVSIWNL,SIWNLDYII,TFKVSIWNL,VSIWNLDYII	NP177	LPRRSGAAGA	peptideci
CASSPDRDYGYTF	ORF6	M.tuberculosis	CD4	FKVSIWNLDY,ILLIIMRTFK,IMRTFKVSI,KVSIWNLDY,KVSIWNLDYI,LIIMRTFKV,RTFKVSIWNL,SIWNLDYII,TFKVSIWNL,VSIWNLDYII	NA	NA	peptideci peptidecii
CASGDYEQYF	ORF6	M.tuberculosis	CD4	FKVSIWNLDY,ILLIIMRTFK,IMRTFKVSI,KVSIWNLDY,KVSIWNLDYI,LIIMRTFKV,RTFKVSIWNL,SIWNLDYII,TFKVSIWNL,VSIWNLDYII	NA	NA	peptideci
CASSPGISYEQYF	ORF6	M.tuberculosis	CD4	FKVSIWNLDY,ILLIIMRTFK,IMRTFKVSI,KVSIWNLDY,KVSIWNLDYI,LIIMRTFKV,RTFKVSIWNL,SIWNLDYII,TFKVSIWNL,VSIWNLDYII	NA	NA	peptideci
CASSLGGGNTEAFF	ORF6	Influenza	CD8	FKVSIWNLDY,ILLIIMRTFK,IMRTFKVSI,KVSIWNLDY,KVSIWNLDYI,LIIMRTFKV,RTFKVSIWNL,SIWNLDYII,TFKVSIWNL,VSIWNLDYII	NP177	LPRRSGAAGA	minigene peptideci
CASSNQETQYF	ORF6	Neoantigen		FKVSIWNLDY,ILLIIMRTFK,IMRTFKVSI,KVSIWNLDY,KVSIWNLDYI,LIIMRTFKV,RTFKVSIWNL,SIWNLDYII,TFKVSIWNL,VSIWNLDYII	GANAB-S5F	ALYGFVPVL	peptideci
CASSPGGLEAFF	ORF6	Influenza	CD8	FKVSIWNLDY,ILLIIMRTFK,IMRTFKVSI,KVSIWNLDY,KVSIWNLDYI,LIIMRTFKV,RTFKVSIWNL,SIWNLDYII,TFKVSIWNL,VSIWNLDYII	NP177	LPRRSGAAGA	peptideci
CASSPGTGGNEQYF	ORF6	Influenza	CD8	FKVSIWNLDY,ILLIIMRTFK,IMRTFKVSI,KVSIWNLDY,KVSIWNLDYI,LIIMRTFKV,RTFKVSIWNL,SIWNLDYII,TFKVSIWNL,VSIWNLDYII	NP	DATYQRTRALVR	peptideci
CASSPLSTDTQYF	ORF7a	Influenza	CD8	CELYHYQECV,ITLATCELY,LITLATCELY,TLATCELYHY	NP177	LPRRSGAAGA	peptideci
CASSLLAGAYNEQFF	ORF7a	M.tuberculosis	CD4	CELYHYQECV,ITLATCELY,LITLATCELY,TLATCELYHY	NA	NA	peptideci
CASSLGSSYEQYF	ORF7a	Melanoma		CELYHYQECV,ITLATCELY,LITLATCELY,TLATCELYHY	gp100	YLEPGPVTA	peptideci
CASSLGSSYEQYF	ORF7a	M.tuberculosis	CD4	CELYHYQECV,ITLATCELY,LITLATCELY,TLATCELYHY	NA	NA	peptideci
CASSLGSYEQYF	ORF7a	DENV	CD8	CELYHYQECV,ITLATCELY,LITLATCELY,TLATCELYHY			peptideci
CASSFGQGYEQYF	ORF7a	Neoantigen		CELYHYQECV,ITLATCELY,LITLATCELY,TLATCELYHY	GLRA1-LIF,GNL3L-R4C	LIFNMFYWI,NLNCCSVPV	peptideci
CASSLQGSYEQYF	ORF7a	Neoantigen		CELYHYQECV,ITLATCELY,LITLATCELY,TLATCELYHY	FNDC3B-L3M	VVMSWAPPV	peptideci
CASSLGQGYEQYF	ORF7a	DENV	CD8	CELYHYQECV,ITLATCELY,LITLATCELY,TLATCELYHY,ELYSPIFLI,LYSPIFLIV,QELYSPIFL,VQELYSPIF,VQELYSPIFL			peptideci
CASSLGTDYEQYF	ORF7a	Influenza	CD8	CELYHYQECV,ITLATCELY,LITLATCELY,TLATCELYHY	NP177	LPRRSGAAGA	peptideci
CASSFGGNEQYF	ORF7a	EBV	CD8	CELYHYQECV,ITLATCELY,LITLATCELY,TLATCELYHY	BMLF-1	GLCTLVAML	peptideci
CASSAGTAYNEQFF	ORF7a	CMV	CD8	QECVRGTTVL	UL29/28	FRCPRRFCF	peptideci
CASSLGGTEAFF	ORF7a	Influenza	CD8	YEGNSPFHPL	NP177	LPRRSGAAGA	peptideci
CASSLGGTEAFF	ORF7a	Celiac disease	CD4	YEGNSPFHPL	NA	NA	peptideci
CASSLGGTEAFF	ORF7a	Neoantigen		YEGNSPFHPL	OR5M3-KMV	KMVAVFYTT	peptideci
CSASPYEQYF	ORF7a	M.tuberculosis	CD4	YEGNSPFHPL	NA	NA	peptideci
CASSSSYEQYF	ORF7a	Influenza	CD8	HPLADNKFAL,SPFHPLADNKFAL	NP177	LPRRSGAAGA	peptideci
CASSLGGSSYEQYF	ORF7a	M.tuberculosis	CD4	HPLADNKFAL,SPFHPLADNKFAL	NA	NA	peptideci
CASSSGGTEAFF	ORF7a	CMV	CD8	HPLADNKFAL,SPFHPLADNKFAL	pp65	NLVPMVATV	peptideci
CASSAGDTGELFF	ORF7a	M.tuberculosis	CD8	HPLADNKFAL,SPFHPLADNKFAL	NA	NA	peptideci
CASSGTGGSYEQYF	ORF7a	M.tuberculosis	CD4	HPLADNKFAL,SPFHPLADNKFAL	NA	NA	peptideci
CASSPWGTDTQYF	ORF7a	M.tuberculosis	CD4	HPLADNKFAL,SPFHPLADNKFAL	NA	NA	peptideci
CASSLKGVSSYNEQFF	ORF7a	CMV	CD8	CPDGVKHVY,DGVKHVYQL,FAFACPDGVKHVY	pp65	TPRVTGGGAM	peptideci
CASSFRQGVNTGELFF	ORF7a	CMV	CD8	CPDGVKHVY,DGVKHVYQL,FAFACPDGVKHVY	pp65	TPRVTGGGAM	peptideci
CASSLIGVSSYNEQFF	ORF7a	CMV	CD8	CPDGVKHVY,DGVKHVYQL,FAFACPDGVKHVY	pp65	TPRVTGGGAM	peptideci
CASSLIGVSSYNEQFF	ORF7a	Influenza	CD8	CPDGVKHVY,DGVKHVYQL,FAFACPDGVKHVY	NP,NP177	LPRRSGAAGA	peptideci
CASSLQLGARTEAFF	ORF7a	CMV	CD8	CPDGVKHVY,DGVKHVYQL,FAFACPDGVKHVY	pp65	TPRVTGGGAM	peptideci
CASSLHTQGARTEAFF	ORF7a	CMV	CD8	CPDGVKHVY,DGVKHVYQL,FAFACPDGVKHVY	pp65	TPRVTGGGAM	peptideci
CASSFRQGANTGELFF	ORF7a	Influenza	CD8	CPDGVKHVY,DGVKHVYQL,FAFACPDGVKHVY	NP177	LPRRSGAAGA	peptideci
CASRTGTGNLYEQYF	ORF7a	CMV	CD8	CPDGVKHVY,DGVKHVYQL,FAFACPDGVKHVY	pp65	TPRVTGGGAM	peptideci
CASSLDTDTQYF	ORF7a	EBV	CD8	CPDGVKHVY,DGVKHVYQL,FAFACPDGVKHVY	BMLF-1	GLCTLVAML	peptideci
CASSLSPSTGNYGYTF	ORF7a	CMV	CD8	CPDGVKHVY,DGVKHVYQL,FAFACPDGVKHVY	pp65	TPRVTGGGAM	peptideci
CASSLHDRTGAGSPLHF	ORF7a	CMV	CD8	CPDGVKHVY,DGVKHVYQL,FAFACPDGVKHVY	pp65	TPRVTGGGAM	peptideci
CASSLRQGANTGELFF	ORF7a	CMV	CD8	CPDGVKHVY,DGVKHVYQL,FAFACPDGVKHVY	pp65	TPRVTGGGAM	peptideci
CASSLGDQPQHF	ORF7a	Breast Cancer	CD8	RARSVSPKL,SVSPKLFIR	NA	NA	peptideci
CASSLGETQYF	ORF7a	Influenza	CD8	RARSVSPKL,SVSPKLFIR	NP177	LPRRSGAAGA	peptideci
CASSLGETQYF	ORF7a	M.tuberculosis	CD4	RARSVSPKL,SVSPKLFIR	NA	NA	peptideci
CASSLEANTEAFF	ORF7a	EBV	CD8	RARSVSPKL,SVSPKLFIR	BMLF-1	GLCTLVAML	peptideci
CASSLGRETQYF	ORF7a	Influenza	CD8	ELYSPIFLI,LYSPIFLIV,QELYSPIFL,VQELYSPIF,VQELYSPIFL	NP,NP177	LPRRSGAAGA	peptideci
CASSLGRETQYF	ORF7a	CMV	CD8	ELYSPIFLI,LYSPIFLIV,QELYSPIFL,VQELYSPIF,VQELYSPIFL	IE-1	CRVLCCYVL	peptideci
CASSLAGFGQPQHF	ORF7a	CMV	CD8	ELYSPIFLI,LYSPIFLIV,QELYSPIFL,VQELYSPIF,VQELYSPIFL	pp50	VTEHDTLLY	peptideci
CASSQVGGDEQFF	ORF7a	Influenza	CD8	ELYSPIFLI,LYSPIFLIV,QELYSPIFL,VQELYSPIF,VQELYSPIFL	NP177	LPRRSGAAGA	peptideci
CASSFGGSYEQYF	ORF7a	Allergy		ELYSPIFLI,LYSPIFLIV,QELYSPIFL,VQELYSPIF,VQELYSPIFL	NA	NA	peptideci
CASSLGGGGYEQYF	ORF7a	Influenza	CD8	ELYSPIFLI,LYSPIFLIV,QELYSPIFL,VQELYSPIF,VQELYSPIFL	NP177	LPRRSGAAGA	peptideci peptidecii
CASSLGGYEQYF	ORF7a	EBV	CD8	ELYSPIFLI,LYSPIFLIV,QELYSPIFL,VQELYSPIF,VQELYSPIFL	BMLF-1	GLCTLVAML	peptideci
CASSLGGYEQYF	ORF7a	Influenza	CD8	ELYSPIFLI,LYSPIFLIV,QELYSPIFL,VQELYSPIF,VQELYSPIFL	NP177	LPRRSGAAGA	peptideci
CASSVEGSSYNEQFF	ORF7a	Neoantigen		ELYSPIFLI,LYSPIFLIV,QELYSPIFL,VQELYSPIF,VQELYSPIFL	VN1R2-LML-L3F	LMFWASSSI	peptideci
CASSFSSSYNEQFF	ORF7a	Influenza	CD8	ELYSPIFLI,LYSPIFLIV,QELYSPIFL,VQELYSPIF,VQELYSPIFL	Matrix protein (M1)	GILGFVFTL	peptideci
CASSFGTGELFF	ORF7a	Influenza	CD8	ELYSPIFLI,LYSPIFLIV,QELYSPIFL,VQELYSPIF,VQELYSPIFL	NP177	LPRRSGAAGA	peptideci
CASSLGDEQFF	ORF7a	M.tuberculosis	CD4	ELYSPIFLI,LYSPIFLIV,QELYSPIFL,VQELYSPIF,VQELYSPIFL	NA	NA	peptideci
CASSLAMNTEAFF	ORF7a	M.tuberculosis	CD4	ELYSPIFLI,LYSPIFLIV,QELYSPIFL,VQELYSPIF,VQELYSPIFL	NA	NA	peptideci
CASSLTGGYNEQFF	ORF7a	EBV	CD8	ELYSPIFLI,LYSPIFLIV,QELYSPIFL,VQELYSPIF,VQELYSPIFL	EBNA1	HPVGEADYFEY	peptideci
CASSEGLAGAYEQYF	ORF7a	CMV	CD8	ELYSPIFLI,LYSPIFLIV,QELYSPIFL,VQELYSPIF,VQELYSPIFL	IE-1	CRVLCCYVL	peptideci
CASSLGTGELFF	ORF7a	CMV	CD8	ELYSPIFLI,LYSPIFLIV,QELYSPIFL,VQELYSPIF,VQELYSPIFL	pp65	NLVPMVATV	peptideci peptidecii
CASSSDSYEQYF	ORF7a	Influenza	CD8	ELYSPIFLI,LYSPIFLIV,QELYSPIFL,VQELYSPIF,VQELYSPIFL	NP177	LPRRSGAAGA	peptideci
CASSQDVGSGNTIYF	ORF7a	CMV	CD8	ELYSPIFLI,LYSPIFLIV,QELYSPIFL,VQELYSPIF,VQELYSPIFL	UL29/28	FRCPRRFCF	peptideci
CASSSGQTNTGELFF	ORF7a	M.tuberculosis	CD4	ELYSPIFLI,LYSPIFLIV,QELYSPIFL,VQELYSPIF,VQELYSPIFL	NA	NA	peptideci
CASSYSTTGELFF	ORF7a	M.tuberculosis	CD4	ELYSPIFLI,LYSPIFLIV,QELYSPIFL,VQELYSPIF,VQELYSPIFL	NA	NA	peptideci
CASSLSGSSYNSPLHF	ORF7a	M.tuberculosis	CD4	ELYSPIFLI,LYSPIFLIV,QELYSPIFL,VQELYSPIF,VQELYSPIFL	NA	NA	peptideci
CASSLAGNTEAFF	ORF7a	Influenza	CD8	ELYSPIFLI,LYSPIFLIV,QELYSPIFL,VQELYSPIF,VQELYSPIFL	NP177	LPRRSGAAGA	peptideci
CASSLGLAGTYEQYF	ORF7a	M.tuberculosis	CD4	ELYSPIFLI,LYSPIFLIV,QELYSPIFL,VQELYSPIF,VQELYSPIFL	NA	NA	peptideci
CASSLGGSYEQYF	ORF7a	Influenza	CD8	ELYSPIFLI,LYSPIFLIV,QELYSPIFL,VQELYSPIF,VQELYSPIFL	NP177	LPRRSGAAGA	peptideci
CASSSGTGELFF	ORF7a	M.tuberculosis	CD4	ELYSPIFLI,LYSPIFLIV,QELYSPIFL,VQELYSPIF,VQELYSPIFL	NA	NA	peptideci
CASSSPGTGIYEQYF	ORF7a	M.tuberculosis	CD4	ELYSPIFLI,LYSPIFLIV,QELYSPIFL,VQELYSPIF,VQELYSPIFL	NA	NA	peptideci
CASSLGQGAYEQYF	ORF7a	DENV	CD8	ELYSPIFLI,LYSPIFLIV,QELYSPIFL,VQELYSPIF,VQELYSPIFL			peptideci
CASSLLQGSSYNEQFF	ORF7a	CMV	CD8	ELYSPIFLI,LYSPIFLIV,QELYSPIFL,VQELYSPIF,VQELYSPIFL	pp65	TPRVTGGGAM	peptideci
CASSLYSNQPQHF	ORF7a	Influenza	CD8	ELYSPIFLI,LYSPIFLIV,QELYSPIFL,VQELYSPIF,VQELYSPIFL	Matrix protein (M1)	GILGFVFTL	peptideci
CASSLYSNQPQHF	ORF7a	M.tuberculosis	CD4	ELYSPIFLI,LYSPIFLIV,QELYSPIFL,VQELYSPIF,VQELYSPIFL	NA	NA	peptideci
CASSPGTGGTEAFF	ORF7a	M.tuberculosis	CD4	ELYSPIFLI,LYSPIFLIV,QELYSPIFL,VQELYSPIF,VQELYSPIFL	NA	NA	peptideci
CASSLGASYNEQFF	ORF7a	M.tuberculosis	CD4	ELYSPIFLI,LYSPIFLIV,QELYSPIFL,VQELYSPIF,VQELYSPIFL	NA	NA	peptideci
CASSLAGGGTDTQYF	ORF7a	M.tuberculosis	CD4	ELYSPIFLI,LYSPIFLIV,QELYSPIFL,VQELYSPIF,VQELYSPIFL	NA	NA	peptideci
CASSLGGTYNEQFF	ORF7a	M.tuberculosis	CD4	ELYSPIFLI,LYSPIFLIV,QELYSPIFL,VQELYSPIF,VQELYSPIFL	NA	NA	peptideci
CASSQGNEQFF	ORF7a	Influenza	CD8	ELYSPIFLI,LYSPIFLIV,QELYSPIFL,VQELYSPIF,VQELYSPIFL	Matrix protein (M1)	GILGFVFTL	peptideci
CASSDGGSPLHF	ORF7a	Influenza	CD8	ELYSPIFLI,LYSPIFLIV,QELYSPIFL,VQELYSPIF,VQELYSPIFL	NP177	LPRRSGAAGA	peptideci
CASSLGGNQPQHF	ORF7a	Influenza	CD8	ELYSPIFLI,LYSPIFLIV,QELYSPIFL,VQELYSPIF,VQELYSPIFL	NP177	LPRRSGAAGA	peptideci peptidecii
CASSLGGNQPQHF	ORF7a	Celiac disease	CD4	ELYSPIFLI,LYSPIFLIV,QELYSPIFL,VQELYSPIF,VQELYSPIFL	NA	NA	peptideci peptidecii
CASSLGGNQPQHF	ORF7a	Inflammatory bowel disease (IBD)	CD4	ELYSPIFLI,LYSPIFLIV,QELYSPIFL,VQELYSPIF,VQELYSPIFL	Flagellin	NA	peptideci peptidecii
CASSLGGNQPQHF	ORF7a	M.tuberculosis	CD4	ELYSPIFLI,LYSPIFLIV,QELYSPIFL,VQELYSPIF,VQELYSPIFL	NA	NA	peptideci peptidecii
CASSWGTDTQYF	ORF7a	Influenza	CD8	ELYSPIFLI,LYSPIFLIV,QELYSPIFL,VQELYSPIF,VQELYSPIFL	NP177	LPRRSGAAGA	peptideci
CASSLGTDTQYF	ORF7a	Celiac disease	CD4	ELYSPIFLI,LYSPIFLIV,QELYSPIFL,VQELYSPIF,VQELYSPIFL	NA	NA	peptideci
CASSYTGELFF	ORF7b	Influenza	CD8	AFLLFLVLI,FLAFLLFLV,FYLCFLAFL,FYLCFLAFLL,IDFYLCFLAF,IELSLIDFYL,LIDFYLCFL,LLFLVLIML,MIELSLIDFY,SLIDFYLCFL,YLCFLAFLL	NP177	LPRRSGAAGA	peptideci
CASSYTGELFF	ORF7b	HCV	CD8	AFLLFLVLI,FLAFLLFLV,FYLCFLAFL,FYLCFLAFLL,IDFYLCFLAF,IELSLIDFYL,LIDFYLCFL,LLFLVLIML,MIELSLIDFY,SLIDFYLCFL,YLCFLAFLL	NS3	KLVALGINAV	peptideci
CASSLGQGNTEAFF	ORF7b	Influenza	CD8	AFLLFLVLI,FLAFLLFLV,FYLCFLAFL,FYLCFLAFLL,IDFYLCFLAF,IELSLIDFYL,LIDFYLCFL,LLFLVLIML,MIELSLIDFY,SLIDFYLCFL,YLCFLAFLL	NP177	LPRRSGAAGA	peptideci
CASSLGQGNTEAFF	ORF7b	M.tuberculosis	CD4	AFLLFLVLI,FLAFLLFLV,FYLCFLAFL,FYLCFLAFLL,IDFYLCFLAF,IELSLIDFYL,LIDFYLCFL,LLFLVLIML,MIELSLIDFY,SLIDFYLCFL,YLCFLAFLL	NA	NA	peptideci
CASSLTGGYEQYF	ORF7b	CMV	CD8	AFLLFLVLI,FLAFLLFLV,FYLCFLAFL,FYLCFLAFLL,IDFYLCFLAF,IELSLIDFYL,LIDFYLCFL,LLFLVLIML,MIELSLIDFY,SLIDFYLCFL,YLCFLAFLL	pp50	VTEHDTLLY	peptideci
CASSLTGGYEQYF	ORF7b	Influenza	CD8	AFLLFLVLI,FLAFLLFLV,FYLCFLAFL,FYLCFLAFLL,IDFYLCFLAF,IELSLIDFYL,LIDFYLCFL,LLFLVLIML,MIELSLIDFY,SLIDFYLCFL,YLCFLAFLL	NP177	LPRRSGAAGA	peptideci
CASSLLNTEAFF	ORF7b	Influenza	CD8	AFLLFLVLI,FLAFLLFLV,FYLCFLAFL,FYLCFLAFLL,IDFYLCFLAF,IELSLIDFYL,LIDFYLCFL,LLFLVLIML,MIELSLIDFY,SLIDFYLCFL,YLCFLAFLL	NP177	LPRRSGAAGA	peptideci
CASSLFGADTQYF	ORF7b	Influenza	CD8	AFLLFLVLI,FLAFLLFLV,FYLCFLAFL,FYLCFLAFLL,IDFYLCFLAF,IELSLIDFYL,LIDFYLCFL,LLFLVLIML,MIELSLIDFY,SLIDFYLCFL,YLCFLAFLL	NP177	LPRRSGAAGA	peptideci
CASSLVAGGGDTQYF	ORF7b	M.tuberculosis	CD4	AFLLFLVLI,FLAFLLFLV,FYLCFLAFL,FYLCFLAFLL,IDFYLCFLAF,IELSLIDFYL,LIDFYLCFL,LLFLVLIML,MIELSLIDFY,SLIDFYLCFL,YLCFLAFLL	NA	NA	peptideci
CASSFRNEQFF	ORF7b	Influenza	CD8	AFLLFLVLI,FLAFLLFLV,FYLCFLAFL,FYLCFLAFLL,IDFYLCFLAF,IELSLIDFYL,LIDFYLCFL,LLFLVLIML,MIELSLIDFY,SLIDFYLCFL,YLCFLAFLL	NP177	LPRRSGAAGA	peptideci peptidecii
CASSLGAEQYF	ORF7b	Neoantigen		AFLLFLVLI,FLAFLLFLV,FYLCFLAFL,FYLCFLAFLL,IDFYLCFLAF,IELSLIDFYL,LIDFYLCFL,LLFLVLIML,MIELSLIDFY,SLIDFYLCFL,YLCFLAFLL	MRM1	LLFGMTPCL	peptideci
CASSLLAGGGNEQFF	ORF7b	M.tuberculosis	CD8	AFLLFLVLI,FLAFLLFLV,FYLCFLAFL,FYLCFLAFLL,IDFYLCFLAF,IELSLIDFYL,LIDFYLCFL,LLFLVLIML,MIELSLIDFY,SLIDFYLCFL,YLCFLAFLL	NA	NA	peptideci
CASSYYSNQPQHF	ORF7b	Influenza	CD8	AFLLFLVLI,FLAFLLFLV,FYLCFLAFL,FYLCFLAFLL,IDFYLCFLAF,IELSLIDFYL,LIDFYLCFL,LLFLVLIML,MIELSLIDFY,SLIDFYLCFL,YLCFLAFLL	M,Matrix protein (M1)	GILGFVFTL	peptideci
CATSSASGSTDTQYF	ORF7b	EBV	CD8	AFLLFLVLI,FLAFLLFLV,FYLCFLAFL,FYLCFLAFLL,IDFYLCFLAF,IELSLIDFYL,LIDFYLCFL,LLFLVLIML,MIELSLIDFY,SLIDFYLCFL,YLCFLAFLL	BMLF-1	GLCTLVAML	peptideci
CASSPILGEQYF	ORF7b	M.tuberculosis	CD4	AFLLFLVLI,FLAFLLFLV,FYLCFLAFL,FYLCFLAFLL,IDFYLCFLAF,IELSLIDFYL,LIDFYLCFL,LLFLVLIML,MIELSLIDFY,SLIDFYLCFL,YLCFLAFLL	NA	NA	peptideci
CASSLGDNEQYF	ORF7b	Psoriatic arthritis		AFLLFLVLI,FLAFLLFLV,FYLCFLAFL,FYLCFLAFLL,IDFYLCFLAF,IELSLIDFYL,LIDFYLCFL,LLFLVLIML,MIELSLIDFY,SLIDFYLCFL,YLCFLAFLL	NA	NA	peptideci
CASSFGGTEAFF	ORF7b	Influenza	CD8	AFLLFLVLI,FLAFLLFLV,FYLCFLAFL,FYLCFLAFLL,IDFYLCFLAF,IELSLIDFYL,LIDFYLCFL,LLFLVLIML,MIELSLIDFY,SLIDFYLCFL,YLCFLAFLL	NP177	LPRRSGAAGA	peptideci
CASSLGGTEAFF	ORF7b	Influenza	CD8	AFLLFLVLI,FLAFLLFLV,FYLCFLAFL,FYLCFLAFLL,IDFYLCFLAF,IELSLIDFYL,LIDFYLCFL,LLFLVLIML,MIELSLIDFY,SLIDFYLCFL,YLCFLAFLL,IMLIIFWFSL,MLIIFWFSL	NP177	LPRRSGAAGA	peptideci
CASSLGGTEAFF	ORF7b	Celiac disease	CD4	AFLLFLVLI,FLAFLLFLV,FYLCFLAFL,FYLCFLAFLL,IDFYLCFLAF,IELSLIDFYL,LIDFYLCFL,LLFLVLIML,MIELSLIDFY,SLIDFYLCFL,YLCFLAFLL,IMLIIFWFSL,MLIIFWFSL	NA	NA	peptideci
CASSLGGTEAFF	ORF7b	Neoantigen		AFLLFLVLI,FLAFLLFLV,FYLCFLAFL,FYLCFLAFLL,IDFYLCFLAF,IELSLIDFYL,LIDFYLCFL,LLFLVLIML,MIELSLIDFY,SLIDFYLCFL,YLCFLAFLL,IMLIIFWFSL,MLIIFWFSL	OR5M3-KMV	KMVAVFYTT	peptideci
CASSPLTDTQYF	ORF7b	EBV	CD8	AFLLFLVLI,FLAFLLFLV,FYLCFLAFL,FYLCFLAFLL,IDFYLCFLAF,IELSLIDFYL,LIDFYLCFL,LLFLVLIML,MIELSLIDFY,SLIDFYLCFL,YLCFLAFLL	BZLF1,BMLF-1,BZLF-1	RAKFKQLL	peptideci
CASSSLGGYEQYF	ORF7b	Neoantigen		AFLLFLVLI,FLAFLLFLV,FYLCFLAFL,FYLCFLAFLL,IDFYLCFLAF,IELSLIDFYL,LIDFYLCFL,LLFLVLIML,MIELSLIDFY,SLIDFYLCFL,YLCFLAFLL	OR14C36-FML-V6L	FMLYLLTLM	peptideci
CASSLGLAGGPGEQFF	ORF7b	CMV	CD8	AFLLFLVLI,FLAFLLFLV,FYLCFLAFL,FYLCFLAFLL,IDFYLCFLAF,IELSLIDFYL,LIDFYLCFL,LLFLVLIML,MIELSLIDFY,SLIDFYLCFL,YLCFLAFLL	pp65	TPRVTGGGAM	peptideci
CASSLGYNEQFF	ORF7b	M.tuberculosis	CD4	AFLLFLVLI,FLAFLLFLV,FYLCFLAFL,FYLCFLAFLL,IDFYLCFLAF,IELSLIDFYL,LIDFYLCFL,LLFLVLIML,MIELSLIDFY,SLIDFYLCFL,YLCFLAFLL	NA	NA	peptideci
CASSPQVNTEAFF	ORF7b	M.tuberculosis	CD4	AFLLFLVLI,FLAFLLFLV,FYLCFLAFL,FYLCFLAFLL,IDFYLCFLAF,IELSLIDFYL,LIDFYLCFL,LLFLVLIML,MIELSLIDFY,SLIDFYLCFL,YLCFLAFLL	NA	NA	peptideci
CASSLSSGGAYEQYF	ORF7b	M.tuberculosis	CD4	AFLLFLVLI,FLAFLLFLV,FYLCFLAFL,FYLCFLAFLL,IDFYLCFLAF,IELSLIDFYL,LIDFYLCFL,LLFLVLIML,MIELSLIDFY,SLIDFYLCFL,YLCFLAFLL	NA	NA	peptideci
CASSLGGNEQFF	ORF7b	Celiac disease	CD4	AFLLFLVLI,FLAFLLFLV,FYLCFLAFL,FYLCFLAFLL,IDFYLCFLAF,IELSLIDFYL,LIDFYLCFL,LLFLVLIML,MIELSLIDFY,SLIDFYLCFL,YLCFLAFLL	NA	NA	peptideci peptidecii
CASSLGGNEQFF	ORF7b	M.tuberculosis	CD4	AFLLFLVLI,FLAFLLFLV,FYLCFLAFL,FYLCFLAFLL,IDFYLCFLAF,IELSLIDFYL,LIDFYLCFL,LLFLVLIML,MIELSLIDFY,SLIDFYLCFL,YLCFLAFLL	NA	NA	peptideci peptidecii
CASSLGQGAGYGYTF	ORF7b	M.tuberculosis	CD4	AFLLFLVLI,FLAFLLFLV,FYLCFLAFL,FYLCFLAFLL,IDFYLCFLAF,IELSLIDFYL,LIDFYLCFL,LLFLVLIML,MIELSLIDFY,SLIDFYLCFL,YLCFLAFLL	NA	NA	peptideci
CASSLGGGTDTQYF	ORF7b	M.tuberculosis	CD4	AFLLFLVLI,FLAFLLFLV,FYLCFLAFL,FYLCFLAFLL,IDFYLCFLAF,IELSLIDFYL,LIDFYLCFL,LLFLVLIML,MIELSLIDFY,SLIDFYLCFL,YLCFLAFLL	NA	NA	peptideci
CASSLEGFTDTQYF	ORF7b	CMV	CD8	AFLLFLVLI,FLAFLLFLV,FYLCFLAFL,FYLCFLAFLL,IDFYLCFLAF,IELSLIDFYL,LIDFYLCFL,LLFLVLIML,MIELSLIDFY,SLIDFYLCFL,YLCFLAFLL	IE-1	QIKVRVKMV	peptideci
CASSFYSNQPQHF	ORF7b	Influenza	CD8	AFLLFLVLI,FLAFLLFLV,FYLCFLAFL,FYLCFLAFLL,IDFYLCFLAF,IELSLIDFYL,LIDFYLCFL,LLFLVLIML,MIELSLIDFY,SLIDFYLCFL,YLCFLAFLL	Matrix protein (M1)	GILGFVFTL	peptideci
CASSFGDSYEQYF	ORF7b	YFV		AFLLFLVLI,FLAFLLFLV,FYLCFLAFL,FYLCFLAFLL,IDFYLCFLAF,IELSLIDFYL,LIDFYLCFL,LLFLVLIML,MIELSLIDFY,SLIDFYLCFL,YLCFLAFLL	YFV-LLW	LLWNGPMAV	peptideci
CASSLGRGYEQYF	ORF7b	M.tuberculosis	CD4	AFLLFLVLI,FLAFLLFLV,FYLCFLAFL,FYLCFLAFLL,IDFYLCFLAF,IELSLIDFYL,LIDFYLCFL,LLFLVLIML,MIELSLIDFY,SLIDFYLCFL,YLCFLAFLL	NA	NA	peptideci
CASSGNTGELFF	ORF7b	HIV	CD8	AFLLFLVLI,FLAFLLFLV,FYLCFLAFL,FYLCFLAFLL,IDFYLCFLAF,IELSLIDFYL,LIDFYLCFL,LLFLVLIML,MIELSLIDFY,SLIDFYLCFL,YLCFLAFLL	Gag	KRWIILGLNK	minigene peptideci
CASSFSYEQYF	ORF7b	Celiac disease	CD4	AFLLFLVLI,FLAFLLFLV,FYLCFLAFL,FYLCFLAFLL,IDFYLCFLAF,IELSLIDFYL,LIDFYLCFL,LLFLVLIML,MIELSLIDFY,SLIDFYLCFL,YLCFLAFLL,IMLIIFWFSL,MLIIFWFSL	NA	NA	peptideci
CASSFSYEQYF	ORF7b	M.tuberculosis	CD4	AFLLFLVLI,FLAFLLFLV,FYLCFLAFL,FYLCFLAFLL,IDFYLCFLAF,IELSLIDFYL,LIDFYLCFL,LLFLVLIML,MIELSLIDFY,SLIDFYLCFL,YLCFLAFLL,IMLIIFWFSL,MLIIFWFSL	NA	NA	peptideci
CASSLGQGADEQYF	ORF7b	M.tuberculosis	CD4	AFLLFLVLI,FLAFLLFLV,FYLCFLAFL,FYLCFLAFLL,IDFYLCFLAF,IELSLIDFYL,LIDFYLCFL,LLFLVLIML,MIELSLIDFY,SLIDFYLCFL,YLCFLAFLL	NA	NA	peptideci
CASSLLGTGELFF	ORF7b	M.tuberculosis	CD4	AFLLFLVLI,FLAFLLFLV,FYLCFLAFL,FYLCFLAFLL,IDFYLCFLAF,IELSLIDFYL,LIDFYLCFL,LLFLVLIML,MIELSLIDFY,SLIDFYLCFL,YLCFLAFLL	NA	NA	peptideci
CASSPFGANVLTF	ORF7b	Influenza	CD8	AFLLFLVLI,FLAFLLFLV,FYLCFLAFL,FYLCFLAFLL,IDFYLCFLAF,IELSLIDFYL,LIDFYLCFL,LLFLVLIML,MIELSLIDFY,SLIDFYLCFL,YLCFLAFLL	Matrix protein (M1)	GILGFVFTL	peptideci
CASSYSSGVETQYF	ORF7b	CMV	CD8	AFLLFLVLI,FLAFLLFLV,FYLCFLAFL,FYLCFLAFLL,IDFYLCFLAF,IELSLIDFYL,LIDFYLCFL,LLFLVLIML,MIELSLIDFY,SLIDFYLCFL,YLCFLAFLL	UL29/28	FRCPRRFCF	peptideci
CASSLAGDYEQYF	ORF7b	CMV	CD8	AFLLFLVLI,FLAFLLFLV,FYLCFLAFL,FYLCFLAFLL,IDFYLCFLAF,IELSLIDFYL,LIDFYLCFL,LLFLVLIML,MIELSLIDFY,SLIDFYLCFL,YLCFLAFLL	pp65	NLVPMVATV	peptideci
CASSLGGNTEAFF	ORF7b	Celiac disease	CD4	AFLLFLVLI,FLAFLLFLV,FYLCFLAFL,FYLCFLAFLL,IDFYLCFLAF,IELSLIDFYL,LIDFYLCFL,LLFLVLIML,MIELSLIDFY,SLIDFYLCFL,YLCFLAFLL,IMLIIFWFSL,MLIIFWFSL	NA	NA	peptideci
CASSYSSGELFF	ORF7b	Influenza	CD8	AFLLFLVLI,FLAFLLFLV,FYLCFLAFL,FYLCFLAFLL,IDFYLCFLAF,IELSLIDFYL,LIDFYLCFL,LLFLVLIML,MIELSLIDFY,SLIDFYLCFL,YLCFLAFLL	NP177	LPRRSGAAGA	peptideci
CASSYSSGELFF	ORF7b	CMV	CD8	AFLLFLVLI,FLAFLLFLV,FYLCFLAFL,FYLCFLAFLL,IDFYLCFLAF,IELSLIDFYL,LIDFYLCFL,LLFLVLIML,MIELSLIDFY,SLIDFYLCFL,YLCFLAFLL	pp65	TPRVTGGGAM	peptideci
CASSLGQGYEQYF	ORF7b	DENV	CD8	AFLLFLVLI,FLAFLLFLV,FYLCFLAFL,FYLCFLAFLL,IDFYLCFLAF,IELSLIDFYL,LIDFYLCFL,LLFLVLIML,MIELSLIDFY,SLIDFYLCFL,YLCFLAFLL			peptideci
CASSEGETQYF	ORF7b	M.tuberculosis	CD4 CD8	AFLLFLVLI,FLAFLLFLV,FYLCFLAFL,FYLCFLAFLL,IDFYLCFLAF,IELSLIDFYL,LIDFYLCFL,LLFLVLIML,MIELSLIDFY,SLIDFYLCFL,YLCFLAFLL	NA	NA	peptideci
CASTQGSTDTQYF	ORF7b	HCV	CD8	AFLLFLVLI,FLAFLLFLV,FYLCFLAFL,FYLCFLAFLL,IDFYLCFLAF,IELSLIDFYL,LIDFYLCFL,LLFLVLIML,MIELSLIDFY,SLIDFYLCFL,YLCFLAFLL	NS3	KLVALGINAV	peptideci
CASSLGAYEQYF	ORF7b	EBV	CD8	AFLLFLVLI,FLAFLLFLV,FYLCFLAFL,FYLCFLAFLL,IDFYLCFLAF,IELSLIDFYL,LIDFYLCFL,LLFLVLIML,MIELSLIDFY,SLIDFYLCFL,YLCFLAFLL	BMLF-1	GLCTLVAML	peptideci
CSARASYEQYF	ORF7b	YFV	CD8	AFLLFLVLI,FLAFLLFLV,FYLCFLAFL,FYLCFLAFLL,IDFYLCFLAF,IELSLIDFYL,LIDFYLCFL,LLFLVLIML,MIELSLIDFY,SLIDFYLCFL,YLCFLAFLL	NS4B	LLWNGPMAV	peptideci
CASSQDLNEQYF	ORF7b	Neoantigen		AFLLFLVLI,FLAFLLFLV,FYLCFLAFL,FYLCFLAFLL,IDFYLCFLAF,IELSLIDFYL,LIDFYLCFL,LLFLVLIML,MIELSLIDFY,SLIDFYLCFL,YLCFLAFLL	OR6F1-VLN-T8M	VLNPFIYML	peptideci
CASSLGDSSYEQYF	ORF7b	CMV	CD8	AFLLFLVLI,FLAFLLFLV,FYLCFLAFL,FYLCFLAFLL,IDFYLCFLAF,IELSLIDFYL,LIDFYLCFL,LLFLVLIML,MIELSLIDFY,SLIDFYLCFL,YLCFLAFLL	pp65	RPHERNGFTVL	peptideci
CASSLGGYEQYF	ORF7b	EBV	CD8	AFLLFLVLI,FLAFLLFLV,FYLCFLAFL,FYLCFLAFLL,IDFYLCFLAF,IELSLIDFYL,LIDFYLCFL,LLFLVLIML,MIELSLIDFY,SLIDFYLCFL,YLCFLAFLL,IMLIIFWFSL,MLIIFWFSL	BMLF-1	GLCTLVAML	peptideci
CASSLGGYEQYF	ORF7b	Influenza	CD8	AFLLFLVLI,FLAFLLFLV,FYLCFLAFL,FYLCFLAFLL,IDFYLCFLAF,IELSLIDFYL,LIDFYLCFL,LLFLVLIML,MIELSLIDFY,SLIDFYLCFL,YLCFLAFLL,IMLIIFWFSL,MLIIFWFSL	NP177	LPRRSGAAGA	peptideci
CASSQGSYEQYF	ORF7b	HCV	CD8	AFLLFLVLI,FLAFLLFLV,FYLCFLAFL,FYLCFLAFLL,IDFYLCFLAF,IELSLIDFYL,LIDFYLCFL,LLFLVLIML,MIELSLIDFY,SLIDFYLCFL,YLCFLAFLL	NS3	KLVALGINAV	peptideci
CASSLGNTEAFF	ORF7b	Neoantigen		AFLLFLVLI,FLAFLLFLV,FYLCFLAFL,FYLCFLAFLL,IDFYLCFLAF,IELSLIDFYL,LIDFYLCFL,LLFLVLIML,MIELSLIDFY,SLIDFYLCFL,YLCFLAFLL	SEC24A	FLYNPLTRV	peptideci
CASSLGNTEAFF	ORF7b	EBV	CD8	AFLLFLVLI,FLAFLLFLV,FYLCFLAFL,FYLCFLAFLL,IDFYLCFLAF,IELSLIDFYL,LIDFYLCFL,LLFLVLIML,MIELSLIDFY,SLIDFYLCFL,YLCFLAFLL	BMLF1	GLCTLVAML	peptideci
CASSFGTGELFF	ORF7b	Influenza	CD8	AFLLFLVLI,FLAFLLFLV,FYLCFLAFL,FYLCFLAFLL,IDFYLCFLAF,IELSLIDFYL,LIDFYLCFL,LLFLVLIML,MIELSLIDFY,SLIDFYLCFL,YLCFLAFLL	NP177	LPRRSGAAGA	peptideci
CASSLRANYGYTF	ORF7b	M.tuberculosis	CD8	AFLLFLVLI,FLAFLLFLV,FYLCFLAFL,FYLCFLAFLL,IDFYLCFLAF,IELSLIDFYL,LIDFYLCFL,LLFLVLIML,MIELSLIDFY,SLIDFYLCFL,YLCFLAFLL	NA	NA	peptideci
CASSYGTGQPQHF	ORF7b	Melanoma	CD8	AFLLFLVLI,FLAFLLFLV,FYLCFLAFL,FYLCFLAFLL,IDFYLCFLAF,IELSLIDFYL,LIDFYLCFL,LLFLVLIML,MIELSLIDFY,SLIDFYLCFL,YLCFLAFLL	Melan-A/MART-1	ELAGIGILTV	peptideci
CSVGTVNTEAFF	ORF7b	M.tuberculosis	CD4	AFLLFLVLI,FLAFLLFLV,FYLCFLAFL,FYLCFLAFLL,IDFYLCFLAF,IELSLIDFYL,LIDFYLCFL,LLFLVLIML,MIELSLIDFY,SLIDFYLCFL,YLCFLAFLL	NA	NA	peptideci
CASSLTGGTDTQYF	ORF7b	M.tuberculosis	CD4	AFLLFLVLI,FLAFLLFLV,FYLCFLAFL,FYLCFLAFLL,IDFYLCFLAF,IELSLIDFYL,LIDFYLCFL,LLFLVLIML,MIELSLIDFY,SLIDFYLCFL,YLCFLAFLL	NA	NA	peptideci
CASSPTGRSYEQYF	ORF7b	Influenza	CD8	AFLLFLVLI,FLAFLLFLV,FYLCFLAFL,FYLCFLAFLL,IDFYLCFLAF,IELSLIDFYL,LIDFYLCFL,LLFLVLIML,MIELSLIDFY,SLIDFYLCFL,YLCFLAFLL	NP177	LPRRSGAAGA	peptideci
CASGGTTDTQYF	ORF7b	M.tuberculosis	CD4	AFLLFLVLI,FLAFLLFLV,FYLCFLAFL,FYLCFLAFLL,IDFYLCFLAF,IELSLIDFYL,LIDFYLCFL,LLFLVLIML,MIELSLIDFY,SLIDFYLCFL,YLCFLAFLL	NA	NA	peptideci
CASSYDRGYEQYF	ORF7b	HIV	CD8	AFLLFLVLI,FLAFLLFLV,FYLCFLAFL,FYLCFLAFLL,IDFYLCFLAF,IELSLIDFYL,LIDFYLCFL,LLFLVLIML,MIELSLIDFY,SLIDFYLCFL,YLCFLAFLL	RF10 Protein Nef	RYPLTFGWCF	peptideci
CASSWTGNTEAFF	ORF7b	Neoantigen		AFLLFLVLI,FLAFLLFLV,FYLCFLAFL,FYLCFLAFLL,IDFYLCFLAF,IELSLIDFYL,LIDFYLCFL,LLFLVLIML,MIELSLIDFY,SLIDFYLCFL,YLCFLAFLL	FNDC3B	VVLSWAPPV	peptideci
CASSGYEQYF	ORF7b	M.tuberculosis	CD4	AFLLFLVLI,FLAFLLFLV,FYLCFLAFL,FYLCFLAFLL,IDFYLCFLAF,IELSLIDFYL,LIDFYLCFL,LLFLVLIML,MIELSLIDFY,SLIDFYLCFL,YLCFLAFLL	NA	NA	peptideci
CASSLGDGNQPQHF	ORF7b	M.tuberculosis	CD4	AFLLFLVLI,FLAFLLFLV,FYLCFLAFL,FYLCFLAFLL,IDFYLCFLAF,IELSLIDFYL,LIDFYLCFL,LLFLVLIML,MIELSLIDFY,SLIDFYLCFL,YLCFLAFLL	NA	NA	peptideci
CASSWGLTYEQYF	ORF7b	Influenza	CD8	AFLLFLVLI,FLAFLLFLV,FYLCFLAFL,FYLCFLAFLL,IDFYLCFLAF,IELSLIDFYL,LIDFYLCFL,LLFLVLIML,MIELSLIDFY,SLIDFYLCFL,YLCFLAFLL	Matrix protein (M1)	GILGFVFTL	peptideci
CASSWAGGDEQYF	ORF7b	M.tuberculosis	CD4	AFLLFLVLI,FLAFLLFLV,FYLCFLAFL,FYLCFLAFLL,IDFYLCFLAF,IELSLIDFYL,LIDFYLCFL,LLFLVLIML,MIELSLIDFY,SLIDFYLCFL,YLCFLAFLL	NA	NA	peptideci
CASSLVGSTDTQYF	ORF7b	M.tuberculosis	CD4	AFLLFLVLI,FLAFLLFLV,FYLCFLAFL,FYLCFLAFLL,IDFYLCFLAF,IELSLIDFYL,LIDFYLCFL,LLFLVLIML,MIELSLIDFY,SLIDFYLCFL,YLCFLAFLL	NA	NA	peptideci peptidecii
CASSPLGGYEQYF	ORF7b	M.tuberculosis	CD4	AFLLFLVLI,FLAFLLFLV,FYLCFLAFL,FYLCFLAFLL,IDFYLCFLAF,IELSLIDFYL,LIDFYLCFL,LLFLVLIML,MIELSLIDFY,SLIDFYLCFL,YLCFLAFLL	NA	NA	peptideci
CASSQYNEQFF	ORF7b	M.tuberculosis	CD4	AFLLFLVLI,FLAFLLFLV,FYLCFLAFL,FYLCFLAFLL,IDFYLCFLAF,IELSLIDFYL,LIDFYLCFL,LLFLVLIML,MIELSLIDFY,SLIDFYLCFL,YLCFLAFLL	NA	NA	peptideci
CASSQVGTVYGYTF	ORF7b	CMV	CD8	AFLLFLVLI,FLAFLLFLV,FYLCFLAFL,FYLCFLAFLL,IDFYLCFLAF,IELSLIDFYL,LIDFYLCFL,LLFLVLIML,MIELSLIDFY,SLIDFYLCFL,YLCFLAFLL	pp65	NLVPMVATV	peptideci
CASSLTNEQFF	ORF7b	CMV	CD8	AFLLFLVLI,FLAFLLFLV,FYLCFLAFL,FYLCFLAFLL,IDFYLCFLAF,IELSLIDFYL,LIDFYLCFL,LLFLVLIML,MIELSLIDFY,SLIDFYLCFL,YLCFLAFLL	pp65	NLVPMVATV	peptideci
CASSPGTGGTDTQYF	ORF7b	Influenza	CD8	AFLLFLVLI,FLAFLLFLV,FYLCFLAFL,FYLCFLAFLL,IDFYLCFLAF,IELSLIDFYL,LIDFYLCFL,LLFLVLIML,MIELSLIDFY,SLIDFYLCFL,YLCFLAFLL	NP177	LPRRSGAAGA	peptideci
CASSLAGNTEAFF	ORF7b	Influenza	CD8	AFLLFLVLI,FLAFLLFLV,FYLCFLAFL,FYLCFLAFLL,IDFYLCFLAF,IELSLIDFYL,LIDFYLCFL,LLFLVLIML,MIELSLIDFY,SLIDFYLCFL,YLCFLAFLL	NP177	LPRRSGAAGA	peptideci
CASSEGQGYEQYF	ORF7b	Neoantigen		AFLLFLVLI,FLAFLLFLV,FYLCFLAFL,FYLCFLAFLL,IDFYLCFLAF,IELSLIDFYL,LIDFYLCFL,LLFLVLIML,MIELSLIDFY,SLIDFYLCFL,YLCFLAFLL	TEAD1-VLE-L8F	VLENFTIFLV	peptideci
CASSLVMNTEAFF	ORF7b	M.tuberculosis	CD4	AFLLFLVLI,FLAFLLFLV,FYLCFLAFL,FYLCFLAFLL,IDFYLCFLAF,IELSLIDFYL,LIDFYLCFL,LLFLVLIML,MIELSLIDFY,SLIDFYLCFL,YLCFLAFLL	NA	NA	peptideci
CASSLAGGGYEQYF	ORF7b	Influenza	CD8	AFLLFLVLI,FLAFLLFLV,FYLCFLAFL,FYLCFLAFLL,IDFYLCFLAF,IELSLIDFYL,LIDFYLCFL,LLFLVLIML,MIELSLIDFY,SLIDFYLCFL,YLCFLAFLL	NP177	LPRRSGAAGA	peptideci
CASSLGQVTGELFF	ORF7b	M.tuberculosis	CD4	AFLLFLVLI,FLAFLLFLV,FYLCFLAFL,FYLCFLAFLL,IDFYLCFLAF,IELSLIDFYL,LIDFYLCFL,LLFLVLIML,MIELSLIDFY,SLIDFYLCFL,YLCFLAFLL	NA	NA	peptideci
CASSLGGSYEQYF	ORF7b	Influenza	CD8	AFLLFLVLI,FLAFLLFLV,FYLCFLAFL,FYLCFLAFLL,IDFYLCFLAF,IELSLIDFYL,LIDFYLCFL,LLFLVLIML,MIELSLIDFY,SLIDFYLCFL,YLCFLAFLL	NP177	LPRRSGAAGA	peptideci
CSVTTSSYEQYF	ORF7b	M.tuberculosis	CD4	AFLLFLVLI,FLAFLLFLV,FYLCFLAFL,FYLCFLAFLL,IDFYLCFLAF,IELSLIDFYL,LIDFYLCFL,LLFLVLIML,MIELSLIDFY,SLIDFYLCFL,YLCFLAFLL	NA	NA	peptideci
CASSLGGQTYEQYF	ORF7b	DENV	CD8	AFLLFLVLI,FLAFLLFLV,FYLCFLAFL,FYLCFLAFLL,IDFYLCFLAF,IELSLIDFYL,LIDFYLCFL,LLFLVLIML,MIELSLIDFY,SLIDFYLCFL,YLCFLAFLL			peptideci
CASSPGGREQYF	ORF7b	Influenza	CD8	AFLLFLVLI,FLAFLLFLV,FYLCFLAFL,FYLCFLAFLL,IDFYLCFLAF,IELSLIDFYL,LIDFYLCFL,LLFLVLIML,MIELSLIDFY,SLIDFYLCFL,YLCFLAFLL	NP177	LPRRSGAAGA	peptideci
CASSLWAGETQYF	ORF7b	Neoantigen		AFLLFLVLI,FLAFLLFLV,FYLCFLAFL,FYLCFLAFLL,IDFYLCFLAF,IELSLIDFYL,LIDFYLCFL,LLFLVLIML,MIELSLIDFY,SLIDFYLCFL,YLCFLAFLL	GNL3L-R4C	NLNCCSVPV	peptideci
CASSLQGATDTQYF	ORF7b	M.tuberculosis	CD4	AFLLFLVLI,FLAFLLFLV,FYLCFLAFL,FYLCFLAFLL,IDFYLCFLAF,IELSLIDFYL,LIDFYLCFL,LLFLVLIML,MIELSLIDFY,SLIDFYLCFL,YLCFLAFLL	NA	NA	peptideci
CASTTTGELFF	ORF7b	M.tuberculosis	CD4	AFLLFLVLI,FLAFLLFLV,FYLCFLAFL,FYLCFLAFLL,IDFYLCFLAF,IELSLIDFYL,LIDFYLCFL,LLFLVLIML,MIELSLIDFY,SLIDFYLCFL,YLCFLAFLL	NA	NA	peptideci
CASSLSLSYEQYF	ORF7b	M.tuberculosis	CD4	AFLLFLVLI,FLAFLLFLV,FYLCFLAFL,FYLCFLAFLL,IDFYLCFLAF,IELSLIDFYL,LIDFYLCFL,LLFLVLIML,MIELSLIDFY,SLIDFYLCFL,YLCFLAFLL	NA	NA	peptideci
CASSLGTGVYEQYF	ORF7b	Influenza	CD8	AFLLFLVLI,FLAFLLFLV,FYLCFLAFL,FYLCFLAFLL,IDFYLCFLAF,IELSLIDFYL,LIDFYLCFL,LLFLVLIML,MIELSLIDFY,SLIDFYLCFL,YLCFLAFLL	NP177	LPRRSGAAGA	peptideci
CASSPRDSNQPQHF	ORF7b	M.tuberculosis	CD4	AFLLFLVLI,FLAFLLFLV,FYLCFLAFL,FYLCFLAFLL,IDFYLCFLAF,IELSLIDFYL,LIDFYLCFL,LLFLVLIML,MIELSLIDFY,SLIDFYLCFL,YLCFLAFLL	NA	NA	peptideci
CASSLGGPYEQYF	ORF7b	EBV	CD8	AFLLFLVLI,FLAFLLFLV,FYLCFLAFL,FYLCFLAFLL,IDFYLCFLAF,IELSLIDFYL,LIDFYLCFL,LLFLVLIML,MIELSLIDFY,SLIDFYLCFL,YLCFLAFLL	BMLF-1	GLCTLVAML	peptideci
CASSYGRNTEAFF	ORF7b	M.tuberculosis	CD4	AFLLFLVLI,FLAFLLFLV,FYLCFLAFL,FYLCFLAFLL,IDFYLCFLAF,IELSLIDFYL,LIDFYLCFL,LLFLVLIML,MIELSLIDFY,SLIDFYLCFL,YLCFLAFLL	NA	NA	peptideci
CASSLYSNQPQHF	ORF7b	Influenza	CD8	AFLLFLVLI,FLAFLLFLV,FYLCFLAFL,FYLCFLAFLL,IDFYLCFLAF,IELSLIDFYL,LIDFYLCFL,LLFLVLIML,MIELSLIDFY,SLIDFYLCFL,YLCFLAFLL	Matrix protein (M1)	GILGFVFTL	peptideci
CASSLYSNQPQHF	ORF7b	M.tuberculosis	CD4	AFLLFLVLI,FLAFLLFLV,FYLCFLAFL,FYLCFLAFLL,IDFYLCFLAF,IELSLIDFYL,LIDFYLCFL,LLFLVLIML,MIELSLIDFY,SLIDFYLCFL,YLCFLAFLL	NA	NA	peptideci
CASSPAPAYEQYF	ORF7b	Neoantigen		AFLLFLVLI,FLAFLLFLV,FYLCFLAFL,FYLCFLAFLL,IDFYLCFLAF,IELSLIDFYL,LIDFYLCFL,LLFLVLIML,MIELSLIDFY,SLIDFYLCFL,YLCFLAFLL	ATP6AP1-KLG-G3W	KLWASPLHV	peptideci
CASSLIYPGELFF	ORF7b	Influenza	CD8	AFLLFLVLI,FLAFLLFLV,FYLCFLAFL,FYLCFLAFLL,IDFYLCFLAF,IELSLIDFYL,LIDFYLCFL,LLFLVLIML,MIELSLIDFY,SLIDFYLCFL,YLCFLAFLL	M,M1	GILGFVFTL	peptideci
CASSPGLAYEQYF	ORF7b	YFV	CD8	AFLLFLVLI,FLAFLLFLV,FYLCFLAFL,FYLCFLAFLL,IDFYLCFLAF,IELSLIDFYL,LIDFYLCFL,LLFLVLIML,MIELSLIDFY,SLIDFYLCFL,YLCFLAFLL	YFV-17D	LLWNGPMAV	minigene peptideci
CASSYSNTGELFF	ORF7b	M.tuberculosis	CD4	AFLLFLVLI,FLAFLLFLV,FYLCFLAFL,FYLCFLAFLL,IDFYLCFLAF,IELSLIDFYL,LIDFYLCFL,LLFLVLIML,MIELSLIDFY,SLIDFYLCFL,YLCFLAFLL	NA	NA	peptideci
CASSLSGSTDTQYF	ORF7b	Influenza	CD8	AFLLFLVLI,FLAFLLFLV,FYLCFLAFL,FYLCFLAFLL,IDFYLCFLAF,IELSLIDFYL,LIDFYLCFL,LLFLVLIML,MIELSLIDFY,SLIDFYLCFL,YLCFLAFLL	NP177	LPRRSGAAGA	peptideci
CASSLSGSTDTQYF	ORF7b	M.tuberculosis	CD4	AFLLFLVLI,FLAFLLFLV,FYLCFLAFL,FYLCFLAFLL,IDFYLCFLAF,IELSLIDFYL,LIDFYLCFL,LLFLVLIML,MIELSLIDFY,SLIDFYLCFL,YLCFLAFLL	NA	NA	peptideci
CASSLVGASYNEQFF	ORF7b	M.tuberculosis	CD4	AFLLFLVLI,FLAFLLFLV,FYLCFLAFL,FYLCFLAFLL,IDFYLCFLAF,IELSLIDFYL,LIDFYLCFL,LLFLVLIML,MIELSLIDFY,SLIDFYLCFL,YLCFLAFLL	NA	NA	peptideci
CASSLDRGTYEQYF	ORF7b	Influenza	CD8	AFLLFLVLI,FLAFLLFLV,FYLCFLAFL,FYLCFLAFLL,IDFYLCFLAF,IELSLIDFYL,LIDFYLCFL,LLFLVLIML,MIELSLIDFY,SLIDFYLCFL,YLCFLAFLL	NP177	LPRRSGAAGA	peptideci
CASSPYSNQPQHF	ORF7b	Neoantigen		AFLLFLVLI,FLAFLLFLV,FYLCFLAFL,FYLCFLAFLL,IDFYLCFLAF,IELSLIDFYL,LIDFYLCFL,LLFLVLIML,MIELSLIDFY,SLIDFYLCFL,YLCFLAFLL	GNL3L-R4C	NLNCCSVPV	peptideci
CASSYSYEQYF	ORF7b	Melanoma	CD8	AFLLFLVLI,FLAFLLFLV,FYLCFLAFL,FYLCFLAFLL,IDFYLCFLAF,IELSLIDFYL,LIDFYLCFL,LLFLVLIML,MIELSLIDFY,SLIDFYLCFL,YLCFLAFLL	NA	NA	peptideci peptidecii
CASSLGQGYNEQFF	ORF7b	Neoantigen		AFLLFLVLI,FLAFLLFLV,FYLCFLAFL,FYLCFLAFLL,IDFYLCFLAF,IELSLIDFYL,LIDFYLCFL,LLFLVLIML,MIELSLIDFY,SLIDFYLCFL,YLCFLAFLL	APBB2-VQY-L7F	VQYLGMFPV	peptideci
CASSLTGNTEAFF	ORF7b	M.tuberculosis	CD4	AFLLFLVLI,FLAFLLFLV,FYLCFLAFL,FYLCFLAFLL,IDFYLCFLAF,IELSLIDFYL,LIDFYLCFL,LLFLVLIML,MIELSLIDFY,SLIDFYLCFL,YLCFLAFLL	NA	NA	peptideci
CASSLTGNTEAFF	ORF7b	HIV	CD8	AFLLFLVLI,FLAFLLFLV,FYLCFLAFL,FYLCFLAFLL,IDFYLCFLAF,IELSLIDFYL,LIDFYLCFL,LLFLVLIML,MIELSLIDFY,SLIDFYLCFL,YLCFLAFLL	Pol	TAFTIPSI	peptideci
CASSLRGYEQYF	ORF7b	Influenza	CD8	AFLLFLVLI,FLAFLLFLV,FYLCFLAFL,FYLCFLAFLL,IDFYLCFLAF,IELSLIDFYL,LIDFYLCFL,LLFLVLIML,MIELSLIDFY,SLIDFYLCFL,YLCFLAFLL	NP177	LPRRSGAAGA	peptideci
CASSLLGNTEAFF	ORF7b	Neoantigen		AFLLFLVLI,FLAFLLFLV,FYLCFLAFL,FYLCFLAFLL,IDFYLCFLAF,IELSLIDFYL,LIDFYLCFL,LLFLVLIML,MIELSLIDFY,SLIDFYLCFL,YLCFLAFLL	DRIP-MLY	MLYQHLLPL	peptideci
CASSPQGVGTEAFF	ORF7b	M.tuberculosis	CD4	AFLLFLVLI,FLAFLLFLV,FYLCFLAFL,FYLCFLAFLL,IDFYLCFLAF,IELSLIDFYL,LIDFYLCFL,LLFLVLIML,MIELSLIDFY,SLIDFYLCFL,YLCFLAFLL	NA	NA	peptideci
CASSQGGGTEAFF	ORF7b	YFV		AFLLFLVLI,FLAFLLFLV,FYLCFLAFL,FYLCFLAFLL,IDFYLCFLAF,IELSLIDFYL,LIDFYLCFL,LLFLVLIML,MIELSLIDFY,SLIDFYLCFL,YLCFLAFLL	YFV-LLW	LLWNGPMAV	peptideci
CASSLGDTQYF	ORF7b	Celiac disease	CD4	AFLLFLVLI,FLAFLLFLV,FYLCFLAFL,FYLCFLAFLL,IDFYLCFLAF,IELSLIDFYL,LIDFYLCFL,LLFLVLIML,MIELSLIDFY,SLIDFYLCFL,YLCFLAFLL	NA	NA	peptideci peptidecii
CASSLGPYNEQFF	ORF7b	M.tuberculosis	CD4	AFLLFLVLI,FLAFLLFLV,FYLCFLAFL,FYLCFLAFLL,IDFYLCFLAF,IELSLIDFYL,LIDFYLCFL,LLFLVLIML,MIELSLIDFY,SLIDFYLCFL,YLCFLAFLL	NA	NA	peptideci
CASSSTGELFF	ORF7b	Celiac disease	CD4	AFLLFLVLI,FLAFLLFLV,FYLCFLAFL,FYLCFLAFLL,IDFYLCFLAF,IELSLIDFYL,LIDFYLCFL,LLFLVLIML,MIELSLIDFY,SLIDFYLCFL,YLCFLAFLL	NA	NA	peptideci
CASSSTGELFF	ORF7b	CMV	CD8	AFLLFLVLI,FLAFLLFLV,FYLCFLAFL,FYLCFLAFLL,IDFYLCFLAF,IELSLIDFYL,LIDFYLCFL,LLFLVLIML,MIELSLIDFY,SLIDFYLCFL,YLCFLAFLL	pp65	RPHERNGFTVL	peptideci
CASSLGGDTQYF	ORF7b	M.tuberculosis	CD4	AFLLFLVLI,FLAFLLFLV,FYLCFLAFL,FYLCFLAFLL,IDFYLCFLAF,IELSLIDFYL,LIDFYLCFL,LLFLVLIML,MIELSLIDFY,SLIDFYLCFL,YLCFLAFLL,IMLIIFWFSL,MLIIFWFSL	NA	NA	peptideci
CASSLEGYTEAFF	ORF7b	CMV	CD8	AFLLFLVLI,FLAFLLFLV,FYLCFLAFL,FYLCFLAFLL,IDFYLCFLAF,IELSLIDFYL,LIDFYLCFL,LLFLVLIML,MIELSLIDFY,SLIDFYLCFL,YLCFLAFLL	pp65	NLVPMVATV	peptideci peptidecii
CASSLEGYTEAFF	ORF7b	M.tuberculosis	CD4	AFLLFLVLI,FLAFLLFLV,FYLCFLAFL,FYLCFLAFLL,IDFYLCFLAF,IELSLIDFYL,LIDFYLCFL,LLFLVLIML,MIELSLIDFY,SLIDFYLCFL,YLCFLAFLL	NA	NA	peptideci peptidecii
CASSSRGTVNTEAFF	ORF7b	CMV	CD8	AFLLFLVLI,FLAFLLFLV,FYLCFLAFL,FYLCFLAFLL,IDFYLCFLAF,IELSLIDFYL,LIDFYLCFL,LLFLVLIML,MIELSLIDFY,SLIDFYLCFL,YLCFLAFLL	pp65	TPRVTGGGAM	peptideci
CASSQGATEAFF	ORF7b	M.tuberculosis	CD4	AFLLFLVLI,FLAFLLFLV,FYLCFLAFL,FYLCFLAFLL,IDFYLCFLAF,IELSLIDFYL,LIDFYLCFL,LLFLVLIML,MIELSLIDFY,SLIDFYLCFL,YLCFLAFLL	NA	NA	peptideci
CASSPGGYGYTF	ORF7b	M.tuberculosis	CD4	AFLLFLVLI,FLAFLLFLV,FYLCFLAFL,FYLCFLAFLL,IDFYLCFLAF,IELSLIDFYL,LIDFYLCFL,LLFLVLIML,MIELSLIDFY,SLIDFYLCFL,YLCFLAFLL	NA	NA	peptideci
CASSLGETQYF	ORF7b	Influenza	CD8	AFLLFLVLI,FLAFLLFLV,FYLCFLAFL,FYLCFLAFLL,IDFYLCFLAF,IELSLIDFYL,LIDFYLCFL,LLFLVLIML,MIELSLIDFY,SLIDFYLCFL,YLCFLAFLL	NP177	LPRRSGAAGA	peptideci
CASSLGETQYF	ORF7b	M.tuberculosis	CD4	AFLLFLVLI,FLAFLLFLV,FYLCFLAFL,FYLCFLAFLL,IDFYLCFLAF,IELSLIDFYL,LIDFYLCFL,LLFLVLIML,MIELSLIDFY,SLIDFYLCFL,YLCFLAFLL	NA	NA	peptideci
CASSYGTDTQYF	ORF7b	M.tuberculosis	CD4	AFLLFLVLI,FLAFLLFLV,FYLCFLAFL,FYLCFLAFLL,IDFYLCFLAF,IELSLIDFYL,LIDFYLCFL,LLFLVLIML,MIELSLIDFY,SLIDFYLCFL,YLCFLAFLL	NA	NA	peptideci
CASSLWDQETQYF	ORF7b	HIV	CD8	AFLLFLVLI,FLAFLLFLV,FYLCFLAFL,FYLCFLAFLL,IDFYLCFLAF,IELSLIDFYL,LIDFYLCFL,LLFLVLIML,MIELSLIDFY,SLIDFYLCFL,YLCFLAFLL	Protein Vpr	FPRPWLHGL	peptideci
CASSFTGNTEAFF	ORF7b	Influenza	CD8	AFLLFLVLI,FLAFLLFLV,FYLCFLAFL,FYLCFLAFLL,IDFYLCFLAF,IELSLIDFYL,LIDFYLCFL,LLFLVLIML,MIELSLIDFY,SLIDFYLCFL,YLCFLAFLL	NP177	LPRRSGAAGA	peptideci
CASSLFSGTQYF	ORF7b	M.tuberculosis	CD4	AFLLFLVLI,FLAFLLFLV,FYLCFLAFL,FYLCFLAFLL,IDFYLCFLAF,IELSLIDFYL,LIDFYLCFL,LLFLVLIML,MIELSLIDFY,SLIDFYLCFL,YLCFLAFLL	NA	NA	peptideci
CASSLGGGQPQHF	ORF7b	M.tuberculosis	CD4	AFLLFLVLI,FLAFLLFLV,FYLCFLAFL,FYLCFLAFLL,IDFYLCFLAF,IELSLIDFYL,LIDFYLCFL,LLFLVLIML,MIELSLIDFY,SLIDFYLCFL,YLCFLAFLL	NA	NA	peptideci
CASSLGGNQPQHF	ORF7b	Influenza	CD8	AFLLFLVLI,FLAFLLFLV,FYLCFLAFL,FYLCFLAFLL,IDFYLCFLAF,IELSLIDFYL,LIDFYLCFL,LLFLVLIML,MIELSLIDFY,SLIDFYLCFL,YLCFLAFLL	NP177	LPRRSGAAGA	peptideci peptidecii
CASSLGGNQPQHF	ORF7b	Celiac disease	CD4	AFLLFLVLI,FLAFLLFLV,FYLCFLAFL,FYLCFLAFLL,IDFYLCFLAF,IELSLIDFYL,LIDFYLCFL,LLFLVLIML,MIELSLIDFY,SLIDFYLCFL,YLCFLAFLL	NA	NA	peptideci peptidecii
CASSLGGNQPQHF	ORF7b	Inflammatory bowel disease (IBD)	CD4	AFLLFLVLI,FLAFLLFLV,FYLCFLAFL,FYLCFLAFLL,IDFYLCFLAF,IELSLIDFYL,LIDFYLCFL,LLFLVLIML,MIELSLIDFY,SLIDFYLCFL,YLCFLAFLL	Flagellin	NA	peptideci peptidecii
CASSLGGNQPQHF	ORF7b	M.tuberculosis	CD4	AFLLFLVLI,FLAFLLFLV,FYLCFLAFL,FYLCFLAFLL,IDFYLCFLAF,IELSLIDFYL,LIDFYLCFL,LLFLVLIML,MIELSLIDFY,SLIDFYLCFL,YLCFLAFLL	NA	NA	peptideci peptidecii
CASSSSYEQYF	ORF7b	Influenza	CD8	AFLLFLVLI,FLAFLLFLV,FYLCFLAFL,FYLCFLAFLL,IDFYLCFLAF,IELSLIDFYL,LIDFYLCFL,LLFLVLIML,MIELSLIDFY,SLIDFYLCFL,YLCFLAFLL	NP177	LPRRSGAAGA	peptideci
CASSVGTDTQYF	ORF7b	M.tuberculosis	CD4	AFLLFLVLI,FLAFLLFLV,FYLCFLAFL,FYLCFLAFLL,IDFYLCFLAF,IELSLIDFYL,LIDFYLCFL,LLFLVLIML,MIELSLIDFY,SLIDFYLCFL,YLCFLAFLL	NA	NA	peptideci
CASSFGDTQYF	ORF7b	CMV	CD8	AFLLFLVLI,FLAFLLFLV,FYLCFLAFL,FYLCFLAFLL,IDFYLCFLAF,IELSLIDFYL,LIDFYLCFL,LLFLVLIML,MIELSLIDFY,SLIDFYLCFL,YLCFLAFLL	IE-1	CRVLCCYVL	peptideci
CASSLDLNTEAFF	ORF7b	M.tuberculosis	CD4	AFLLFLVLI,FLAFLLFLV,FYLCFLAFL,FYLCFLAFLL,IDFYLCFLAF,IELSLIDFYL,LIDFYLCFL,LLFLVLIML,MIELSLIDFY,SLIDFYLCFL,YLCFLAFLL	NA	NA	peptideci
CASRDYEQYF	ORF7b	HIV	CD8	AFLLFLVLI,FLAFLLFLV,FYLCFLAFL,FYLCFLAFLL,IDFYLCFLAF,IELSLIDFYL,LIDFYLCFL,LLFLVLIML,MIELSLIDFY,SLIDFYLCFL,YLCFLAFLL	Gag	GPGHKARVL	peptideci
CASSYSGGETQYF	ORF7b	M.tuberculosis	CD4	AFLLFLVLI,FLAFLLFLV,FYLCFLAFL,FYLCFLAFLL,IDFYLCFLAF,IELSLIDFYL,LIDFYLCFL,LLFLVLIML,MIELSLIDFY,SLIDFYLCFL,YLCFLAFLL	NA	NA	peptideci
CASSQGQGGYEQYF	ORF7b	EBV	CD8	AFLLFLVLI,FLAFLLFLV,FYLCFLAFL,FYLCFLAFLL,IDFYLCFLAF,IELSLIDFYL,LIDFYLCFL,LLFLVLIML,MIELSLIDFY,SLIDFYLCFL,YLCFLAFLL	BMLF-1	GLCTLVAML	peptideci
CASSPDRGNQPQHF	ORF7b	EBV	CD8	AFLLFLVLI,FLAFLLFLV,FYLCFLAFL,FYLCFLAFLL,IDFYLCFLAF,IELSLIDFYL,LIDFYLCFL,LLFLVLIML,MIELSLIDFY,SLIDFYLCFL,YLCFLAFLL	BMLF-1	GLCTLVAML	peptideci
CASSLQGQETQYF	ORF7b	M.tuberculosis	CD4	AFLLFLVLI,FLAFLLFLV,FYLCFLAFL,FYLCFLAFLL,IDFYLCFLAF,IELSLIDFYL,LIDFYLCFL,LLFLVLIML,MIELSLIDFY,SLIDFYLCFL,YLCFLAFLL	NA	NA	peptideci
CASSLAVDEQYF	ORF7b	CMV	CD8	AFLLFLVLI,FLAFLLFLV,FYLCFLAFL,FYLCFLAFLL,IDFYLCFLAF,IELSLIDFYL,LIDFYLCFL,LLFLVLIML,MIELSLIDFY,SLIDFYLCFL,YLCFLAFLL	IE-1	CRVLCCYVL	peptideci
CASSPHTEAFF	ORF7b	Neoantigen		AFLLFLVLI,FLAFLLFLV,FYLCFLAFL,FYLCFLAFLL,IDFYLCFLAF,IELSLIDFYL,LIDFYLCFL,LLFLVLIML,MIELSLIDFY,SLIDFYLCFL,YLCFLAFLL	OR9Q2-SID-S1F	FIDCYLLAI	peptideci
CASSIYSNQPQHF	ORF7b	Influenza	CD8	AFLLFLVLI,FLAFLLFLV,FYLCFLAFL,FYLCFLAFLL,IDFYLCFLAF,IELSLIDFYL,LIDFYLCFL,LLFLVLIML,MIELSLIDFY,SLIDFYLCFL,YLCFLAFLL	M,Matrix protein (M1)	GILGFVFTL	peptideci
CASSLGTSSSYEQYF	ORF7b	HIV	CD8	AFLLFLVLI,FLAFLLFLV,FYLCFLAFL,FYLCFLAFLL,IDFYLCFLAF,IELSLIDFYL,LIDFYLCFL,LLFLVLIML,MIELSLIDFY,SLIDFYLCFL,YLCFLAFLL	Gag	KRWIIMGLNK	peptideci
CASSVSSYEQYF	ORF7b	Influenza	CD8	AFLLFLVLI,FLAFLLFLV,FYLCFLAFL,FYLCFLAFLL,IDFYLCFLAF,IELSLIDFYL,LIDFYLCFL,LLFLVLIML,MIELSLIDFY,SLIDFYLCFL,YLCFLAFLL	NP177	LPRRSGAAGA	peptideci
CASSPPSTDTQYF	ORF7b	Influenza	CD8	AFLLFLVLI,FLAFLLFLV,FYLCFLAFL,FYLCFLAFLL,IDFYLCFLAF,IELSLIDFYL,LIDFYLCFL,LLFLVLIML,MIELSLIDFY,SLIDFYLCFL,YLCFLAFLL	NP177	LPRRSGAAGA	peptideci
CASSLGDEQFF	ORF7b	M.tuberculosis	CD4	AFLLFLVLI,FLAFLLFLV,FYLCFLAFL,FYLCFLAFLL,IDFYLCFLAF,IELSLIDFYL,LIDFYLCFL,LLFLVLIML,MIELSLIDFY,SLIDFYLCFL,YLCFLAFLL	NA	NA	peptideci
CASSYGQGYEQYF	ORF7b	Neoantigen		AFLLFLVLI,FLAFLLFLV,FYLCFLAFL,FYLCFLAFLL,IDFYLCFLAF,IELSLIDFYL,LIDFYLCFL,LLFLVLIML,MIELSLIDFY,SLIDFYLCFL,YLCFLAFLL	GNL3L-R4C	NLNCCSVPV	peptideci
CASSLAGSYEQYF	ORF7b	Influenza	CD8	AFLLFLVLI,FLAFLLFLV,FYLCFLAFL,FYLCFLAFLL,IDFYLCFLAF,IELSLIDFYL,LIDFYLCFL,LLFLVLIML,MIELSLIDFY,SLIDFYLCFL,YLCFLAFLL	NP177	LPRRSGAAGA	peptideci
CASTGGGELFF	ORF7b	Influenza	CD8	AFLLFLVLI,FLAFLLFLV,FYLCFLAFL,FYLCFLAFLL,IDFYLCFLAF,IELSLIDFYL,LIDFYLCFL,LLFLVLIML,MIELSLIDFY,SLIDFYLCFL,YLCFLAFLL	NP177	LPRRSGAAGA	peptideci
CASSLGLAGYEQYF	ORF7b	EBV	CD8	AFLLFLVLI,FLAFLLFLV,FYLCFLAFL,FYLCFLAFLL,IDFYLCFLAF,IELSLIDFYL,LIDFYLCFL,LLFLVLIML,MIELSLIDFY,SLIDFYLCFL,YLCFLAFLL	EBNA3A		peptideci
CASSLGSYEQYF	ORF7b	DENV	CD8	AFLLFLVLI,FLAFLLFLV,FYLCFLAFL,FYLCFLAFLL,IDFYLCFLAF,IELSLIDFYL,LIDFYLCFL,LLFLVLIML,MIELSLIDFY,SLIDFYLCFL,YLCFLAFLL,IMLIIFWFSL,MLIIFWFSL			peptideci
CASSYGLEQYF	ORF7b	Neoantigen		AFLLFLVLI,FLAFLLFLV,FYLCFLAFL,FYLCFLAFLL,IDFYLCFLAF,IELSLIDFYL,LIDFYLCFL,LLFLVLIML,MIELSLIDFY,SLIDFYLCFL,YLCFLAFLL	MPV17-YLW-A5P	YLWPPVQLA	peptideci
CASSYGGGNQPQHF	ORF7b	M.tuberculosis	CD4	AFLLFLVLI,FLAFLLFLV,FYLCFLAFL,FYLCFLAFLL,IDFYLCFLAF,IELSLIDFYL,LIDFYLCFL,LLFLVLIML,MIELSLIDFY,SLIDFYLCFL,YLCFLAFLL	NA	NA	peptideci
CASSLAGTGYGYTF	ORF7b	Toxic epidermal necrolysis	CD8	AFLLFLVLI,FLAFLLFLV,FYLCFLAFL,FYLCFLAFLL,IDFYLCFLAF,IELSLIDFYL,LIDFYLCFL,LLFLVLIML,MIELSLIDFY,SLIDFYLCFL,YLCFLAFLL	NA	NA	peptideci
CASSAGGNTIYF	ORF7b	Neoantigen		AFLLFLVLI,FLAFLLFLV,FYLCFLAFL,FYLCFLAFLL,IDFYLCFLAF,IELSLIDFYL,LIDFYLCFL,LLFLVLIML,MIELSLIDFY,SLIDFYLCFL,YLCFLAFLL	TRPV4-FMI-A6T	FMIGYTSAL	peptideci
CASSLGGVEQYF	ORF7b	M.tuberculosis	CD4	AFLLFLVLI,FLAFLLFLV,FYLCFLAFL,FYLCFLAFLL,IDFYLCFLAF,IELSLIDFYL,LIDFYLCFL,LLFLVLIML,MIELSLIDFY,SLIDFYLCFL,YLCFLAFLL	NA	NA	peptideci
CASSSVGGSYEQYF	ORF7b	Neoantigen		AFLLFLVLI,FLAFLLFLV,FYLCFLAFL,FYLCFLAFLL,IDFYLCFLAF,IELSLIDFYL,LIDFYLCFL,LLFLVLIML,MIELSLIDFY,SLIDFYLCFL,YLCFLAFLL	OR14C36-FML-V6L	FMLYLLTLM	peptideci
CASSEGTGELFF	ORF7b	M.tuberculosis	CD8	AFLLFLVLI,FLAFLLFLV,FYLCFLAFL,FYLCFLAFLL,IDFYLCFLAF,IELSLIDFYL,LIDFYLCFL,LLFLVLIML,MIELSLIDFY,SLIDFYLCFL,YLCFLAFLL	NA	NA	peptideci
CASSLQETQYF	ORF7b	Inflammatory bowel disease (IBD)	CD4	AFLLFLVLI,FLAFLLFLV,FYLCFLAFL,FYLCFLAFLL,IDFYLCFLAF,IELSLIDFYL,LIDFYLCFL,LLFLVLIML,MIELSLIDFY,SLIDFYLCFL,YLCFLAFLL	Flagellin	NA	peptideci
CASSLIGYEQYF	ORF7b	Influenza	CD4	AFLLFLVLI,FLAFLLFLV,FYLCFLAFL,FYLCFLAFLL,IDFYLCFLAF,IELSLIDFYL,LIDFYLCFL,LLFLVLIML,MIELSLIDFY,SLIDFYLCFL,YLCFLAFLL	M1	QARQMVQAMRTIGTHP	peptideci
CASSSGSYEQYF	ORF7b	Influenza	CD8	AFLLFLVLI,FLAFLLFLV,FYLCFLAFL,FYLCFLAFLL,IDFYLCFLAF,IELSLIDFYL,LIDFYLCFL,LLFLVLIML,MIELSLIDFY,SLIDFYLCFL,YLCFLAFLL	NP177	LPRRSGAAGA	peptideci
CASSSGSYEQYF	ORF7b	DENV	CD8	AFLLFLVLI,FLAFLLFLV,FYLCFLAFL,FYLCFLAFLL,IDFYLCFLAF,IELSLIDFYL,LIDFYLCFL,LLFLVLIML,MIELSLIDFY,SLIDFYLCFL,YLCFLAFLL			peptideci
CASSLAGGGEQYF	ORF7b	EBV		AFLLFLVLI,FLAFLLFLV,FYLCFLAFL,FYLCFLAFLL,IDFYLCFLAF,IELSLIDFYL,LIDFYLCFL,LLFLVLIML,MIELSLIDFY,SLIDFYLCFL,YLCFLAFLL	BRLF-1	YVLDHLIVV	peptideci
CASSLGASSYNEQFF	ORF7b	Influenza	CD8	AFLLFLVLI,FLAFLLFLV,FYLCFLAFL,FYLCFLAFLL,IDFYLCFLAF,IELSLIDFYL,LIDFYLCFL,LLFLVLIML,MIELSLIDFY,SLIDFYLCFL,YLCFLAFLL	NP177	LPRRSGAAGA	peptideci
CASSLGGVNTGELFF	ORF7b	M.tuberculosis	CD4	AFLLFLVLI,FLAFLLFLV,FYLCFLAFL,FYLCFLAFLL,IDFYLCFLAF,IELSLIDFYL,LIDFYLCFL,LLFLVLIML,MIELSLIDFY,SLIDFYLCFL,YLCFLAFLL	NA	NA	peptideci
CASSAGGGSYNEQFF	ORF7b	CMV	CD8	AFLLFLVLI,FLAFLLFLV,FYLCFLAFL,FYLCFLAFLL,IDFYLCFLAF,IELSLIDFYL,LIDFYLCFL,LLFLVLIML,MIELSLIDFY,SLIDFYLCFL,YLCFLAFLL	pp65	NLVPMVATV	peptideci
CASSQSGTEAFF	ORF7b	Influenza	CD8	AFLLFLVLI,FLAFLLFLV,FYLCFLAFL,FYLCFLAFLL,IDFYLCFLAF,IELSLIDFYL,LIDFYLCFL,LLFLVLIML,MIELSLIDFY,SLIDFYLCFL,YLCFLAFLL	NP177	LPRRSGAAGA	peptideci
CASSPGLAGEQFF	ORF7b	Influenza	CD8	AFLLFLVLI,FLAFLLFLV,FYLCFLAFL,FYLCFLAFLL,IDFYLCFLAF,IELSLIDFYL,LIDFYLCFL,LLFLVLIML,MIELSLIDFY,SLIDFYLCFL,YLCFLAFLL	NP177	LPRRSGAAGA	peptideci
CASSTGGAGYEQYF	ORF7b	M.tuberculosis	CD4	AFLLFLVLI,FLAFLLFLV,FYLCFLAFL,FYLCFLAFLL,IDFYLCFLAF,IELSLIDFYL,LIDFYLCFL,LLFLVLIML,MIELSLIDFY,SLIDFYLCFL,YLCFLAFLL	NA	NA	peptideci
CASSVGNTEAFF	ORF7b	Neoantigen		AFLLFLVLI,FLAFLLFLV,FYLCFLAFL,FYLCFLAFLL,IDFYLCFLAF,IELSLIDFYL,LIDFYLCFL,LLFLVLIML,MIELSLIDFY,SLIDFYLCFL,YLCFLAFLL	GALC-YVV-V3L	YVLTWIVGA	peptideci
CASSLGQGTDTQYF	ORF7b	Influenza	CD8	AFLLFLVLI,FLAFLLFLV,FYLCFLAFL,FYLCFLAFLL,IDFYLCFLAF,IELSLIDFYL,LIDFYLCFL,LLFLVLIML,MIELSLIDFY,SLIDFYLCFL,YLCFLAFLL	NP177	LPRRSGAAGA	peptideci
CASSLGQGTDTQYF	ORF7b	M.tuberculosis	CD4	AFLLFLVLI,FLAFLLFLV,FYLCFLAFL,FYLCFLAFLL,IDFYLCFLAF,IELSLIDFYL,LIDFYLCFL,LLFLVLIML,MIELSLIDFY,SLIDFYLCFL,YLCFLAFLL	NA	NA	peptideci
CASSLTDTQYF	ORF7b	Breast Cancer	CD8	AFLLFLVLI,FLAFLLFLV,FYLCFLAFL,FYLCFLAFLL,IDFYLCFLAF,IELSLIDFYL,LIDFYLCFL,LLFLVLIML,MIELSLIDFY,SLIDFYLCFL,YLCFLAFLL	NA	NA	peptideci
CASSLTDTQYF	ORF7b	CMV	CD8	AFLLFLVLI,FLAFLLFLV,FYLCFLAFL,FYLCFLAFLL,IDFYLCFLAF,IELSLIDFYL,LIDFYLCFL,LLFLVLIML,MIELSLIDFY,SLIDFYLCFL,YLCFLAFLL	pp50	VTEHDTLLY	peptideci
CASSLTDTQYF	ORF7b	Influenza	CD8	AFLLFLVLI,FLAFLLFLV,FYLCFLAFL,FYLCFLAFLL,IDFYLCFLAF,IELSLIDFYL,LIDFYLCFL,LLFLVLIML,MIELSLIDFY,SLIDFYLCFL,YLCFLAFLL	NP177	LPRRSGAAGA	peptideci
CASSLRDRDSGANVLTF	ORF7b	M.tuberculosis	CD4	AFLLFLVLI,FLAFLLFLV,FYLCFLAFL,FYLCFLAFLL,IDFYLCFLAF,IELSLIDFYL,LIDFYLCFL,LLFLVLIML,MIELSLIDFY,SLIDFYLCFL,YLCFLAFLL	NA	NA	peptideci
CASRGIAGGTYEQYF	ORF7b	M.tuberculosis	CD4	AFLLFLVLI,FLAFLLFLV,FYLCFLAFL,FYLCFLAFLL,IDFYLCFLAF,IELSLIDFYL,LIDFYLCFL,LLFLVLIML,MIELSLIDFY,SLIDFYLCFL,YLCFLAFLL	NA	NA	peptideci
CASSLDSSSYNEQFF	ORF7b	M.tuberculosis	CD4	AFLLFLVLI,FLAFLLFLV,FYLCFLAFL,FYLCFLAFLL,IDFYLCFLAF,IELSLIDFYL,LIDFYLCFL,LLFLVLIML,MIELSLIDFY,SLIDFYLCFL,YLCFLAFLL	NA	NA	peptideci
CASSPGGELFF	ORF7b	HCV	CD8	AFLLFLVLI,FLAFLLFLV,FYLCFLAFL,FYLCFLAFLL,IDFYLCFLAF,IELSLIDFYL,LIDFYLCFL,LLFLVLIML,MIELSLIDFY,SLIDFYLCFL,YLCFLAFLL	NS3	KLVALGINAV	peptideci
CASSYNEQFF	ORF7b	CMV	CD8	AFLLFLVLI,FLAFLLFLV,FYLCFLAFL,FYLCFLAFLL,IDFYLCFLAF,IELSLIDFYL,LIDFYLCFL,LLFLVLIML,MIELSLIDFY,SLIDFYLCFL,YLCFLAFLL	pp65	NLVPMVATV	peptideci
CASSLGGDIQYF	ORF7b	HCV	CD8	AFLLFLVLI,FLAFLLFLV,FYLCFLAFL,FYLCFLAFLL,IDFYLCFLAF,IELSLIDFYL,LIDFYLCFL,LLFLVLIML,MIELSLIDFY,SLIDFYLCFL,YLCFLAFLL	NS3	KLVALGINAV	peptideci
CASSFNYGYTF	ORF7b	M.tuberculosis	CD4	AFLLFLVLI,FLAFLLFLV,FYLCFLAFL,FYLCFLAFLL,IDFYLCFLAF,IELSLIDFYL,LIDFYLCFL,LLFLVLIML,MIELSLIDFY,SLIDFYLCFL,YLCFLAFLL	NA	NA	peptideci
CASSLGGGYTF	ORF7b	HIV	CD8	AFLLFLVLI,FLAFLLFLV,FYLCFLAFL,FYLCFLAFLL,IDFYLCFLAF,IELSLIDFYL,LIDFYLCFL,LLFLVLIML,MIELSLIDFY,SLIDFYLCFL,YLCFLAFLL	Gag,Gag p24	KAFSPEVIPMF	peptideci
CASSLATEAFF	ORF7b	CMV	CD8	AFLLFLVLI,FLAFLLFLV,FYLCFLAFL,FYLCFLAFLL,IDFYLCFLAF,IELSLIDFYL,LIDFYLCFL,LLFLVLIML,MIELSLIDFY,SLIDFYLCFL,YLCFLAFLL	pp65	TPRVTGGGAM	peptideci
CASSFGADTQYF	ORF7b	HCV	CD8	AFLLFLVLI,FLAFLLFLV,FYLCFLAFL,FYLCFLAFLL,IDFYLCFLAF,IELSLIDFYL,LIDFYLCFL,LLFLVLIML,MIELSLIDFY,SLIDFYLCFL,YLCFLAFLL	NS3	KLVALGINAV	peptideci
CASSISGTGELFF	ORF7b	M.tuberculosis	CD8	AFLLFLVLI,FLAFLLFLV,FYLCFLAFL,FYLCFLAFLL,IDFYLCFLAF,IELSLIDFYL,LIDFYLCFL,LLFLVLIML,MIELSLIDFY,SLIDFYLCFL,YLCFLAFLL	NA	NA	peptideci
CASSLGGDTYEQYF	ORF7b	M.tuberculosis	CD4	AFLLFLVLI,FLAFLLFLV,FYLCFLAFL,FYLCFLAFLL,IDFYLCFLAF,IELSLIDFYL,LIDFYLCFL,LLFLVLIML,MIELSLIDFY,SLIDFYLCFL,YLCFLAFLL	NA	NA	peptideci
CASSLGGDTYEQYF	ORF7b	DENV	CD8	AFLLFLVLI,FLAFLLFLV,FYLCFLAFL,FYLCFLAFLL,IDFYLCFLAF,IELSLIDFYL,LIDFYLCFL,LLFLVLIML,MIELSLIDFY,SLIDFYLCFL,YLCFLAFLL			peptideci
CASSPLSTDTQYF	ORF7b	Influenza	CD8	AFLLFLVLI,FLAFLLFLV,FYLCFLAFL,FYLCFLAFLL,IDFYLCFLAF,IELSLIDFYL,LIDFYLCFL,LLFLVLIML,MIELSLIDFY,SLIDFYLCFL,YLCFLAFLL	NP177	LPRRSGAAGA	peptideci
CASSEANYGYTF	ORF7b	M.tuberculosis	CD4	AFLLFLVLI,FLAFLLFLV,FYLCFLAFL,FYLCFLAFLL,IDFYLCFLAF,IELSLIDFYL,LIDFYLCFL,LLFLVLIML,MIELSLIDFY,SLIDFYLCFL,YLCFLAFLL	NA	NA	peptideci
CASSLNTEAFF	ORF7b	Neoantigen		AFLLFLVLI,FLAFLLFLV,FYLCFLAFL,FYLCFLAFLL,IDFYLCFLAF,IELSLIDFYL,LIDFYLCFL,LLFLVLIML,MIELSLIDFY,SLIDFYLCFL,YLCFLAFLL	SREBF1-YLQ-L6M	YLQDSMATT	peptideci
CASSLNTEAFF	ORF7b	M.tuberculosis	CD4	AFLLFLVLI,FLAFLLFLV,FYLCFLAFL,FYLCFLAFLL,IDFYLCFLAF,IELSLIDFYL,LIDFYLCFL,LLFLVLIML,MIELSLIDFY,SLIDFYLCFL,YLCFLAFLL	NA	NA	peptideci
CASSLKSGELFF	ORF7b	EBV	CD8	AFLLFLVLI,FLAFLLFLV,FYLCFLAFL,FYLCFLAFLL,IDFYLCFLAF,IELSLIDFYL,LIDFYLCFL,LLFLVLIML,MIELSLIDFY,SLIDFYLCFL,YLCFLAFLL	EBNA1	HPVGEADYFEY	peptideci
CASSQLAGAYNEQFF	ORF7b	Toxic epidermal necrolysis	CD8	AFLLFLVLI,FLAFLLFLV,FYLCFLAFL,FYLCFLAFLL,IDFYLCFLAF,IELSLIDFYL,LIDFYLCFL,LLFLVLIML,MIELSLIDFY,SLIDFYLCFL,YLCFLAFLL	NA	NA	peptideci peptidecii
CASSLGQGTYEQYF	ORF7b	Neoantigen		IMLIIFWFSL,MLIIFWFSL	ST6GALNAC2-LLF-Y6H	LLFALHFSA	peptideci
CASSLGQGTYEQYF	ORF7b	DENV	CD8	IMLIIFWFSL,MLIIFWFSL			peptideci
CASSQGGTEAFF	ORF7b	Influenza	CD8	IMLIIFWFSL,MLIIFWFSL	NP177	LPRRSGAAGA	peptideci
CASSLEGASYEQYF	ORF7b	Diabetes Type 1	CD4	IMLIIFWFSL,MLIIFWFSL	NA	NA	peptideci
CASSLGGHEQYF	ORF7b	Influenza	CD8	IMLIIFWFSL,MLIIFWFSL	NP177	LPRRSGAAGA	peptideci
CASSLGNTIYF	ORF7b	M.tuberculosis	CD4	IMLIIFWFSL,MLIIFWFSL	NA	NA	peptideci
CASSLGEKLFF	ORF7b	HCV	CD8	IMLIIFWFSL,MLIIFWFSL	NS3	KLVALGINAV	peptideci
CASSLGQGAYEQYF	ORF7b	DENV	CD8	IMLIIFWFSL,MLIIFWFSL			peptideci
CASSLVGTGELFF	ORF7b	Influenza	CD8	IMLIIFWFSL,MLIIFWFSL	Matrix protein (M1)	GILGFVFTL	peptideci
CASSLVGTGELFF	ORF7b	CMV	CD8	IMLIIFWFSL,MLIIFWFSL	pp65	NLVPMVATV	peptideci
CASSLGGSSYEQYF	ORF7b	M.tuberculosis	CD4	IMLIIFWFSL,MLIIFWFSL	NA	NA	peptideci
CASSLGWGYEQYF	ORF7b	Neoantigen		IMLIIFWFSL,MLIIFWFSL	CMV-MLN	MLNIPSINV	peptideci
CASRAADTQYF	ORF7b	M.tuberculosis	CD4	IMLIIFWFSL,MLIIFWFSL	NA	NA	peptideci
CASSISYEQYF	ORF7b	HIV	CD8	IMLIIFWFSL,MLIIFWFSL	Gag	KAFSPEVIPMF	peptideci
CASSPGGTEAFF	ORF7b	Melanoma		IMLIIFWFSL,MLIIFWFSL	Melan-A/MART-1	ELAGIGILTV	peptideci
CASSPGGTEAFF	ORF7b	M.tuberculosis	CD4	IMLIIFWFSL,MLIIFWFSL	NA	NA	peptideci
CASSPGTGYEQYF	ORF7b	Neoantigen		IMLIIFWFSL,MLIIFWFSL	ATP6AP1-KLG-G3W	KLWASPLHV	peptideci
CASSLGGDEQYF	ORF7b	Neoantigen		IMLIIFWFSL,MLIIFWFSL	LCP1-NLF	NLFNRYPAL	peptideci
CASSPGQGNTEAFF	ORF7b	M.tuberculosis	CD4	IMLIIFWFSL,MLIIFWFSL	NA	NA	peptideci
CASSLGPYTDTQYF	ORF7b	CMV	CD8	IMLIIFWFSL,MLIIFWFSL	IE-1	CRVLCCYVL	peptideci
CASSLEGGTQYF	ORF7b	M.tuberculosis	CD4	IMLIIFWFSL,MLIIFWFSL	NA	NA	peptideci
CASSLANTEAFF	ORF7b	M.tuberculosis	CD4	IMLIIFWFSL,MLIIFWFSL	NA	NA	peptideci
CASSRTSGTDTQYF	ORF7b	M.tuberculosis	CD8	IMLIIFWFSL,MLIIFWFSL	NA	NA	peptideci
CASSPGQGETQYF	ORF7b	Influenza	CD8	IMLIIFWFSL,MLIIFWFSL	NP177	LPRRSGAAGA	peptideci
CASSFGAYSNQPQHF	ORF7b	Influenza	CD8	IMLIIFWFSL,MLIIFWFSL	NP177	LPRRSGAAGA	peptideci
CASSLAYEQYF	ORF7b	Neoantigen		IMLIIFWFSL,MLIIFWFSL	PGM5	AVGSHVYSV	peptideci
CASSLISSDTQYF	ORF7b	Influenza	CD8	IMLIIFWFSL,MLIIFWFSL	NP177	LPRRSGAAGA	peptideci
CASSFGGSSYEQYF	ORF7b	Neoantigen		IMLIIFWFSL,MLIIFWFSL	FNDC3B	VVLSWAPPV	peptideci
CASSWGSETQYF	ORF7b	M.tuberculosis	CD4	IMLIIFWFSL,MLIIFWFSL	NA	NA	peptideci
CASSSGGVYEQYF	ORF7b	CMV	CD8	IMLIIFWFSL,MLIIFWFSL	pp65	IPSINVHHY	peptideci
CASSLDRNEQFF	ORF8	HIV	CD8	VDDPCPIHFY,VVDDPCPIHFY,YVVDDPCPI	Gag	KRWIILGLNK	peptideci
CASSYGVGTEAFF	ORF8	Influenza	CD8	VDDPCPIHFY,VVDDPCPIHFY,YVVDDPCPI	Matrix protein (M1)	GILGFVFTL	peptideci
CASSPTSGSTDTQYF	ORF8	M.tuberculosis	CD4	VDDPCPIHFY,VVDDPCPIHFY,YVVDDPCPI	NA	NA	peptideci
CASSLYQETQYF	ORF8	M.tuberculosis	CD4	VDDPCPIHFY,VVDDPCPIHFY,YVVDDPCPI	NA	NA	peptideci
CASSLGSYEQYF	ORF8	DENV	CD8	VDDPCPIHFY,VVDDPCPIHFY,YVVDDPCPI			peptideci
CASSLERGGNEQFF	ORF8	M.tuberculosis	CD4	VDDPCPIHFY,VVDDPCPIHFY,YVVDDPCPI	NA	NA	peptideci
CASSLGGYEQYF	ORF8	EBV	CD8	RVGARKSAPL,VGARKSAPL	BMLF-1	GLCTLVAML	peptideci
CASSLGGYEQYF	ORF8	Influenza	CD8	RVGARKSAPL,VGARKSAPL	NP177	LPRRSGAAGA	peptideci
CASSEYNTEAFF	ORF8	M.tuberculosis	CD4	IQYIDIGNY	NA	NA	peptideci
CASSPGGNQPQHF	ORF8	Influenza	CD8	IQYIDIGNY	NP177	LPRRSGAAGA	peptideci
CASSLRGTGELFF	ORF8	HIV	CD8	IQYIDIGNY	Nef	FLKEKGGL	peptideci
CASSLGGNQPQHF	ORF8	Influenza	CD8	IQYIDIGNY	NP177	LPRRSGAAGA	peptideci peptidecii
CASSLGGNQPQHF	ORF8	Celiac disease	CD4	IQYIDIGNY	NA	NA	peptideci peptidecii
CASSLGGNQPQHF	ORF8	Inflammatory bowel disease (IBD)	CD4	IQYIDIGNY	Flagellin	NA	peptideci peptidecii
CASSLGGNQPQHF	ORF8	M.tuberculosis	CD4	IQYIDIGNY	NA	NA	peptideci peptidecii
CASSSQGNQPQHF	ORF8	CMV	CD8	IQYIDIGNY	IE-1	CRVLCCYVL	peptideci
CASSFTDTQYF	ORF8	CMV	CD8	GNYTVSCLPF,NYTVSCLPF,YTVSCLPFTI	IE-1	CRVLCCYVL	peptideci
CASSFTDTQYF	ORF8	M.tuberculosis	CD4	GNYTVSCLPF,NYTVSCLPF,YTVSCLPFTI	NA	NA	peptideci
CASSFAGELFF	ORF8	CMV	CD8	GNYTVSCLPF,NYTVSCLPF,YTVSCLPFTI	IE2	NEGVKAAW	peptideci
CASSQGLAGANEQFF	ORF8	EBV	CD8	GNYTVSCLPF,NYTVSCLPF,YTVSCLPFTI	BMLF-1	GLCTLVAML	peptideci
CASSLTDTQYF	ORF8	Breast Cancer	CD8	GNYTVSCLPF,NYTVSCLPF,YTVSCLPFTI	NA	NA	peptideci
CASSLTDTQYF	ORF8	CMV	CD8	GNYTVSCLPF,NYTVSCLPF,YTVSCLPFTI	pp50	VTEHDTLLY	peptideci
CASSLTDTQYF	ORF8	Influenza	CD8	GNYTVSCLPF,NYTVSCLPF,YTVSCLPFTI	NP177	LPRRSGAAGA	peptideci
CASSLGTGPYNEQFF	ORF8	Influenza	CD8	GNYTVSCLPF,NYTVSCLPF,YTVSCLPFTI	Matrix protein (M1)	GILGFVFTL	peptideci
CASSLDRGNEQFF	ORF8	M.tuberculosis	CD4	GNYTVSCLPF,NYTVSCLPF,YTVSCLPFTI	NA	NA	peptideci
CASRDRGDTEAFF	ORF8	M.tuberculosis	CD4	GNYTVSCLPF,NYTVSCLPF,YTVSCLPFTI	NA	NA	peptideci
CASSLNWDTEAFF	ORF8	Celiac disease	CD4	GNYTVSCLPF,NYTVSCLPF,YTVSCLPFTI	NA,DQ2-a-I	NA,PFPQPELPY	peptideci
CASSYPDTQYF	ORF8	CMV	CD8	DFLEYHDVR,EDFLEYHDVR,LEYHDVRVV,LEYHDVRVVL,YEDFLEYHDVRVVL	IE-1	CRVLCCYVL	peptideci
CASSLESGELFF	ORF8	CMV	CD8	DFLEYHDVR,EDFLEYHDVR,LEYHDVRVV,LEYHDVRVVL,YEDFLEYHDVRVVL	UL29/28	FRCPRRFCF	peptideci
CASSSGTVNTGELFF	ORF8	HCV	CD8	DFLEYHDVR,EDFLEYHDVR,LEYHDVRVV,LEYHDVRVVL,YEDFLEYHDVRVVL	NS3	ATDALMTGY	peptideci
CASSPSGANVLTF	ORF8	EBV	CD8	DFLEYHDVR,EDFLEYHDVR,LEYHDVRVV,LEYHDVRVVL,YEDFLEYHDVRVVL	BZLF1,BMLF-1	RAKFKQLL	peptideci
CASSPSGANVLTF	ORF8	CMV	CD8	DFLEYHDVR,EDFLEYHDVR,LEYHDVRVV,LEYHDVRVVL,YEDFLEYHDVRVVL	pp65	TPRVTGGGAM	peptideci
CASSPSGANVLTF	ORF8	M.tuberculosis	CD4	DFLEYHDVR,EDFLEYHDVR,LEYHDVRVV,LEYHDVRVVL,YEDFLEYHDVRVVL	NA	NA	peptideci
CASSPGLAGTDTQYF	ORF8	M.tuberculosis	CD8	DFLEYHDVR,EDFLEYHDVR,LEYHDVRVV,LEYHDVRVVL,YEDFLEYHDVRVVL	NA	NA	peptideci
CASSLGDSSYEQYF	ORF8	CMV	CD8	DFLEYHDVR,EDFLEYHDVR,LEYHDVRVV,LEYHDVRVVL,YEDFLEYHDVRVVL	pp65	RPHERNGFTVL	peptideci
CASSPPGGNEQFF	ORF8	Influenza	CD8	DFLEYHDVR,EDFLEYHDVR,LEYHDVRVV,LEYHDVRVVL,YEDFLEYHDVRVVL	NP177	LPRRSGAAGA	peptideci
CASSLGGEETQYF	ORF8	EBV	CD8	DFLEYHDVR,EDFLEYHDVR,LEYHDVRVV,LEYHDVRVVL,YEDFLEYHDVRVVL	BMLF-1	GLCTLVAML	peptideci
CASSLIGGADTQYF	ORF8	Influenza	CD8	DFLEYHDVR,EDFLEYHDVR,LEYHDVRVV,LEYHDVRVVL,YEDFLEYHDVRVVL	NP177	LPRRSGAAGA	peptideci
CASSVAGTSTDTQYF	ORF8	M.tuberculosis	CD4	DFLEYHDVR,EDFLEYHDVR,LEYHDVRVV,LEYHDVRVVL,YEDFLEYHDVRVVL	NA	NA	peptideci
CASSPGGYNEQFF	ORF8	M.tuberculosis	CD4	DFLEYHDVR,EDFLEYHDVR,LEYHDVRVV,LEYHDVRVVL,YEDFLEYHDVRVVL	NA	NA	peptideci
CSVALAGSSYNEQFF	ORF8	M.tuberculosis	CD4	DFLEYHDVR,EDFLEYHDVR,LEYHDVRVV,LEYHDVRVVL,YEDFLEYHDVRVVL	NA	NA	peptideci
CASSLGTSSYEQYF	ORF8	HIV	CD8	DFLEYHDVR,EDFLEYHDVR,LEYHDVRVV,LEYHDVRVVL,YEDFLEYHDVRVVL	Gag	KRWIILGLNK,KRWIIMGLNK	peptideci
CASSLTGGGTEAFF	ORF8	M.tuberculosis	CD4	DFLEYHDVR,EDFLEYHDVR,LEYHDVRVV,LEYHDVRVVL,YEDFLEYHDVRVVL	NA	NA	peptideci
CASSLDSYEQYF	ORF8	HIV	CD8	DFLEYHDVR,EDFLEYHDVR,LEYHDVRVV,LEYHDVRVVL,YEDFLEYHDVRVVL	Gag,p24 KK10	KRWIILGLNK	peptideci
CASSLGSGTQYF	ORF8	HCV		DFLEYHDVR,EDFLEYHDVR,LEYHDVRVV,LEYHDVRVVL,YEDFLEYHDVRVVL	HCV-KLV	KLVALGINAV	peptideci
CASSSSGANVLTF	ORF8	M.tuberculosis	CD4	DFLEYHDVR,EDFLEYHDVR,LEYHDVRVV,LEYHDVRVVL,YEDFLEYHDVRVVL	NA	NA	peptideci
CASSLTGTSRQETQYF	ORF8	M.tuberculosis	CD4	DFLEYHDVR,EDFLEYHDVR,LEYHDVRVV,LEYHDVRVVL,YEDFLEYHDVRVVL	NA	NA	peptideci
CASSTGTSTDTQYF	ORF8	M.tuberculosis	CD4	DFLEYHDVR,EDFLEYHDVR,LEYHDVRVV,LEYHDVRVVL,YEDFLEYHDVRVVL	NA	NA	peptideci
CASSPGTGELFF	nucleocapsid phosphoprotein	HIV	CD8	FPRGQGVPI,KFPRGQGVPI	Gag	KRWIILGLNK	peptideci
CASSQGQGGYEQYF	nucleocapsid phosphoprotein	EBV	CD8	FPRGQGVPI,KFPRGQGVPI	BMLF-1	GLCTLVAML	peptideci
CASSPAYEQYF	nucleocapsid phosphoprotein	Influenza	CD8	FPRGQGVPI,KFPRGQGVPI	NP177	LPRRSGAAGA	minigene peptideci
CASSPAYEQYF	nucleocapsid phosphoprotein	CMV	CD8	FPRGQGVPI,KFPRGQGVPI	pp65	TPRVTGGGAM	minigene peptideci
CASSSGFSGNTIYF	nucleocapsid phosphoprotein	CMV	CD8	NSSPDDQIGY,NTNSSPDDQIGYY,SSPDDQIGY,SSPDDQIGYY	pp65	RPHERNGFTVL	peptideci
CASSAGGGSYNEQFF	nucleocapsid phosphoprotein	CMV	CD8	YYRRATRRIR	pp65	NLVPMVATV	peptideci
CASSFGGYEQYF	nucleocapsid phosphoprotein	HCV		RIRGGDGKM,RIRGGDGKMK	HCV-KLV	KLVALGINAV	peptideci
CASSLGGYEQYF	nucleocapsid phosphoprotein	EBV	CD8	RIRGGDGKM,RIRGGDGKMK,GMEVTPSGTWL,MEVTPSGTWL,TPSGTWLTY,VTPSGTWLTY	BMLF-1	GLCTLVAML	peptideci
CASSLGGYEQYF	nucleocapsid phosphoprotein	Influenza	CD8	RIRGGDGKM,RIRGGDGKMK,GMEVTPSGTWL,MEVTPSGTWL,TPSGTWLTY,VTPSGTWLTY	NP177	LPRRSGAAGA	peptideci
CASSLAGYEQYF	nucleocapsid phosphoprotein	CMV	CD8	RIRGGDGKM,RIRGGDGKMK,LSPRWYFYY,SPRWYFYYL	pp65	NLVPMVATV	peptideci
CASSLSSYNEQFF	nucleocapsid phosphoprotein	Influenza	CD8	KMKDLSPRW	Matrix protein (M1)	GILGFVFTL	peptideci
CASSQDPGYEQYF	nucleocapsid phosphoprotein	Influenza	CD8	LSPRWYFYY,SPRWYFYYL	M,Matrix protein (M1)	GILGFVFTL	peptideci
CASSLAGARETQYF	nucleocapsid phosphoprotein	Influenza	CD8	LSPRWYFYY,SPRWYFYYL	NP177	LPRRSGAAGA	peptideci
CASSVRGNEQFF	nucleocapsid phosphoprotein	HTLV-1	CD8	LSPRWYFYY,SPRWYFYYL	Tax-1	SFHSLHLLF	peptideci
CASSLSGGPYNEQFF	nucleocapsid phosphoprotein	M.tuberculosis	CD4	LSPRWYFYY,SPRWYFYYL	NA	NA	peptideci
CASSYSNTGELFF	nucleocapsid phosphoprotein	M.tuberculosis	CD4	LSPRWYFYY,SPRWYFYYL	NA	NA	peptideci
CASSLAGGDGYTF	nucleocapsid phosphoprotein	Influenza	CD8	LSPRWYFYY,SPRWYFYYL	NP177	LPRRSGAAGA	peptideci peptidecii
CASSLTGPNTEAFF	nucleocapsid phosphoprotein	M.tuberculosis	CD4	LSPRWYFYY,SPRWYFYYL	NA	NA	peptideci
CASSPRLAGQETQYF	nucleocapsid phosphoprotein	M.tuberculosis	CD4	LSPRWYFYY,SPRWYFYYL	NA	NA	peptideci
CASSLAGTYEQYF	nucleocapsid phosphoprotein	Influenza	CD8	LSPRWYFYY,SPRWYFYYL	NP177	LPRRSGAAGA	peptideci
CASSLGGQTYEQYF	nucleocapsid phosphoprotein	DENV	CD8	LSPRWYFYY,SPRWYFYYL			peptideci
CASSRSYEQYF	nucleocapsid phosphoprotein	M.tuberculosis	CD4	LSPRWYFYY,SPRWYFYYL	NA	NA	peptideci
CASSQGLAGPSYEQYF	nucleocapsid phosphoprotein	Influenza	CD8	LSPRWYFYY,SPRWYFYYL	NP177	LPRRSGAAGA	peptideci
CASSLAGSYEQYF	nucleocapsid phosphoprotein	Influenza	CD8	LSPRWYFYY,SPRWYFYYL	NP177	LPRRSGAAGA	peptideci
CASSPGTGSYEQYF	nucleocapsid phosphoprotein	EBV	CD8	LSPRWYFYY,SPRWYFYYL	BZLF1,BZLF-1	RAKFKQLL	peptideci
CASSPGTGSYEQYF	nucleocapsid phosphoprotein	Influenza	CD8	LSPRWYFYY,SPRWYFYYL	NP177	LPRRSGAAGA	peptideci
CASSLAGATEAFF	nucleocapsid phosphoprotein	M.tuberculosis	CD4	LSPRWYFYY,SPRWYFYYL	NA	NA	peptideci
CASSLGGSYEQYF	nucleocapsid phosphoprotein	Influenza	CD8	LSPRWYFYY,SPRWYFYYL,GMEVTPSGTWL,MEVTPSGTWL,TPSGTWLTY,VTPSGTWLTY	NP177	LPRRSGAAGA	peptideci
CASSLSYEQYF	nucleocapsid phosphoprotein	Influenza	CD8	LSPRWYFYY,SPRWYFYYL	NP177	LPRRSGAAGA	peptideci peptidecii
CASSLSYEQYF	nucleocapsid phosphoprotein	Neoantigen		LSPRWYFYY,SPRWYFYYL	PIGN-FLT-P7H	FLTVFSHFM	peptideci peptidecii
CASSLSYEQYF	nucleocapsid phosphoprotein	M.tuberculosis	CD4	LSPRWYFYY,SPRWYFYYL	NA	NA	peptideci peptidecii
CASSLDLNSPLHF	nucleocapsid phosphoprotein	M.tuberculosis	CD4	LSPRWYFYY,SPRWYFYYL	NA	NA	peptideci
CASSWGGAYEQYF	nucleocapsid phosphoprotein	YFV	CD8	LSPRWYFYY,SPRWYFYYL	YFV-17D	LLWNGPMAV	peptideci
CASSWSSVNTGELFF	nucleocapsid phosphoprotein	M.tuberculosis	CD4	LSPRWYFYY,SPRWYFYYL	NA	NA	peptideci
CASSLEGANYGYTF	nucleocapsid phosphoprotein	Influenza	CD8	LSPRWYFYY,SPRWYFYYL	Matrix protein (M1)	GILGFVFTL	peptideci
CASSLFSNQPQHF	nucleocapsid phosphoprotein	CMV	CD8	LSPRWYFYY,SPRWYFYYL	UL29/28	FRCPRRFCF	peptideci
CASSLGGNEQFF	nucleocapsid phosphoprotein	Celiac disease	CD4	LSPRWYFYY,SPRWYFYYL,FSKQLQQSM	NA	NA	peptideci peptidecii
CASSLGGNEQFF	nucleocapsid phosphoprotein	M.tuberculosis	CD4	LSPRWYFYY,SPRWYFYYL,FSKQLQQSM	NA	NA	peptideci peptidecii
CASSLAGGETQYF	nucleocapsid phosphoprotein	Influenza	CD8	LSPRWYFYY,SPRWYFYYL	NP177	LPRRSGAAGA	peptideci
CASSSNQPQHF	nucleocapsid phosphoprotein	M.tuberculosis	CD4	LSPRWYFYY,SPRWYFYYL	NA	NA	peptideci
CASSLTGGYEQYF	nucleocapsid phosphoprotein	CMV	CD8	LSPRWYFYY,SPRWYFYYL	pp50	VTEHDTLLY	peptideci
CASSLTGGYEQYF	nucleocapsid phosphoprotein	Influenza	CD8	LSPRWYFYY,SPRWYFYYL	NP177	LPRRSGAAGA	peptideci
CASRGGGTEAFF	nucleocapsid phosphoprotein	Influenza	CD8	LSPRWYFYY,SPRWYFYYL	NP177	LPRRSGAAGA	peptideci
CASSLSPTDTQYF	nucleocapsid phosphoprotein	Neoantigen		LSPRWYFYY,SPRWYFYYL	OR5M3-KMV	KMVAVFYTT	peptideci
CASSLAGTGELFF	nucleocapsid phosphoprotein	M.tuberculosis	CD4	LSPRWYFYY,SPRWYFYYL	NA	NA	peptideci
CASSLAGGSNQPQHF	nucleocapsid phosphoprotein	Influenza	CD8	LSPRWYFYY,SPRWYFYYL	M,Matrix protein (M1)	GILGFVFTL	peptideci
CASRENTGELFF	nucleocapsid phosphoprotein	Influenza	CD8	ALNTPKDHI,ATEGALNTPK	NP177	LPRRSGAAGA	peptideci
CASSLGNTGELFF	nucleocapsid phosphoprotein	CMV	CD8	ALNTPKDHI,ATEGALNTPK,ALALLLLDR,GDAALALLLL,LALLLLDRL,LLLDRLNQL,LLLLDRLNQ,LLLLDRLNQL	UL29/28	FRCPRRFCF	peptideci
CASSLNSNQPQHF	nucleocapsid phosphoprotein	M.tuberculosis	CD4	ALNTPKDHI,ATEGALNTPK	NA	NA	peptideci
CASSLGPGELFF	nucleocapsid phosphoprotein	M.tuberculosis	CD4	ALNTPKDHI,ATEGALNTPK	NA	NA	peptideci
CASSFRDTDTQYF	nucleocapsid phosphoprotein	M.tuberculosis	CD4	ALNTPKDHI,ATEGALNTPK	NA	NA	peptideci
CASSWSNTEAFF	nucleocapsid phosphoprotein	M.tuberculosis	CD4	NPANNAAIV,NPANNAAIVL,RNPANNAAIV	NA	NA	peptideci
CASSLGDSSYEQYF	nucleocapsid phosphoprotein	CMV	CD8	NPANNAAIV,NPANNAAIVL,RNPANNAAIV	pp65	RPHERNGFTVL	peptideci
CASSYSGNTGELFF	nucleocapsid phosphoprotein	M.tuberculosis	CD4	NPANNAAIV,NPANNAAIVL,RNPANNAAIV	NA	NA	peptideci
CASSFFPGELFF	nucleocapsid phosphoprotein	Neoantigen		SQASSRSSSR,AYKTFPPTEPK,KTFPPTEPK	C3orf58-LMV	LMVLHSPSL	peptideci
CASSFTDTQYF	nucleocapsid phosphoprotein	CMV	CD8	SQASSRSSSR	IE-1	CRVLCCYVL	peptideci
CASSFTDTQYF	nucleocapsid phosphoprotein	M.tuberculosis	CD4	SQASSRSSSR	NA	NA	peptideci
CASSPGTYEQYF	nucleocapsid phosphoprotein	Influenza	CD8	ALALLLLDR,GDAALALLLL,LALLLLDRL,LLLDRLNQL,LLLLDRLNQ,LLLLDRLNQL	NP177	LPRRSGAAGA	peptideci
CASSPGNYGYTF	nucleocapsid phosphoprotein	M.tuberculosis	CD4	ALALLLLDR,GDAALALLLL,LALLLLDRL,LLLDRLNQL,LLLLDRLNQ,LLLLDRLNQL,ELIRQGTDY,QELIRQGTDY,QELIRQGTDYKHW	NA	NA	peptideci
CASSYSGNTEAFF	nucleocapsid phosphoprotein	CMV	CD8	ALALLLLDR,GDAALALLLL,LALLLLDRL,LLLDRLNQL,LLLLDRLNQ,LLLLDRLNQL	pp65	TPRVTGGGAM	peptideci
CSAGGTEAFF	nucleocapsid phosphoprotein	M.tuberculosis	CD4	ALALLLLDR,GDAALALLLL,LALLLLDRL,LLLDRLNQL,LLLLDRLNQ,LLLLDRLNQL	NA	NA	peptideci
CASSLQGTQPQHF	nucleocapsid phosphoprotein	CMV	CD8	ALALLLLDR,GDAALALLLL,LALLLLDRL,LLLDRLNQL,LLLLDRLNQ,LLLLDRLNQL	UL29/28	FRCPRRFCF	peptideci
CASSLVGGSTEAFF	nucleocapsid phosphoprotein	M.tuberculosis	CD4	ALALLLLDR,GDAALALLLL,LALLLLDRL,LLLDRLNQL,LLLLDRLNQ,LLLLDRLNQL	NA	NA	peptideci
CASSWEAGELFF	nucleocapsid phosphoprotein	M.tuberculosis	CD4	ALALLLLDR,GDAALALLLL,LALLLLDRL,LLLDRLNQL,LLLLDRLNQ,LLLLDRLNQL	NA	NA	peptideci
CASSGDSYGYTF	nucleocapsid phosphoprotein	M.tuberculosis	CD4	ALALLLLDR,GDAALALLLL,LALLLLDRL,LLLDRLNQL,LLLLDRLNQ,LLLLDRLNQL	NA	NA	peptideci
CASSLGSYEQYF	nucleocapsid phosphoprotein	DENV	CD8	ALALLLLDR,GDAALALLLL,LALLLLDRL,LLLDRLNQL,LLLLDRLNQ,LLLLDRLNQL			peptideci
CASSLDSYEQYF	nucleocapsid phosphoprotein	HIV	CD8	ALALLLLDR,GDAALALLLL,LALLLLDRL,LLLDRLNQL,LLLLDRLNQ,LLLLDRLNQL,GMSRIGMEV,SRIGMEVTPSGTW	Gag,p24 KK10	KRWIILGLNK	peptideci
CASSSGQPNTEAFF	nucleocapsid phosphoprotein	CMV	CD8	ALALLLLDR,GDAALALLLL,LALLLLDRL,LLLDRLNQL,LLLLDRLNQ,LLLLDRLNQL	IE-1	CRVLCCYVL	peptideci
CASSLDGNTGELFF	nucleocapsid phosphoprotein	M.tuberculosis	CD4	ALALLLLDR,GDAALALLLL,LALLLLDRL,LLLDRLNQL,LLLLDRLNQ,LLLLDRLNQL	NA	NA	peptideci
CASSPSGGAYGYTF	nucleocapsid phosphoprotein	YFV	CD8	ALALLLLDR,GDAALALLLL,LALLLLDRL,LLLDRLNQL,LLLLDRLNQ,LLLLDRLNQL	YFV-17D	LLWNGPMAV	peptideci
CASSLLAGETQYF	nucleocapsid phosphoprotein	CMV	CD8	KAYNVTQAF	pp65	RPHERNGFTVL	peptideci
CASSLGGDEQYF	nucleocapsid phosphoprotein	Neoantigen		KAYNVTQAF	LCP1-NLF	NLFNRYPAL	peptideci
CASSLGYEQYF	nucleocapsid phosphoprotein	Influenza	CD8	KAYNVTQAF	NP177	LPRRSGAAGA	peptideci
CASSLGYEQYF	nucleocapsid phosphoprotein	Celiac disease	CD4	KAYNVTQAF	NA	NA	peptideci
CASSLGYEQYF	nucleocapsid phosphoprotein	M.tuberculosis	CD4	KAYNVTQAF	NA	NA	peptideci
CASTLAGGTDTQYF	nucleocapsid phosphoprotein	CMV	CD8	KAYNVTQAF	pp65	NLVPMVATV	peptideci
CASSPGTPNTEAFF	nucleocapsid phosphoprotein	CMV	CD8	KAYNVTQAF	IE-1	CRVLCCYVL	peptideci
CASSLTGELFF	nucleocapsid phosphoprotein	M.tuberculosis	CD4	KAYNVTQAF,APSASAFFGM,AQFAPSASA,ASAFFGMSR,SASAFFGMSR	NA	NA	peptideci
CASSFGGNTEAFF	nucleocapsid phosphoprotein	CMV	CD8	KAYNVTQAF	pp65	RPHERNGFTVL	peptideci
CASSFGGNTEAFF	nucleocapsid phosphoprotein	Psoriatic arthritis		KAYNVTQAF	NA	NA	peptideci
CASSLGGDTQYF	nucleocapsid phosphoprotein	M.tuberculosis	CD4	KAYNVTQAF	NA	NA	peptideci
CASSLGGNQPQHF	nucleocapsid phosphoprotein	Influenza	CD8	KAYNVTQAF	NP177	LPRRSGAAGA	peptideci peptidecii
CASSLGGNQPQHF	nucleocapsid phosphoprotein	Celiac disease	CD4	KAYNVTQAF	NA	NA	peptideci peptidecii
CASSLGGNQPQHF	nucleocapsid phosphoprotein	Inflammatory bowel disease (IBD)	CD4	KAYNVTQAF	Flagellin	NA	peptideci peptidecii
CASSLGGNQPQHF	nucleocapsid phosphoprotein	M.tuberculosis	CD4	KAYNVTQAF	NA	NA	peptideci peptidecii
CASSLGQGGETQYF	nucleocapsid phosphoprotein	Allergy	CD4	KAYNVTQAF	Beryllium sulfate	FWIDLFETIG	peptideci
CASSLGGDIQYF	nucleocapsid phosphoprotein	HCV	CD8	KAYNVTQAF	NS3	KLVALGINAV	peptideci
CASSQDRGGSYEQYF	nucleocapsid phosphoprotein	M.tuberculosis	CD8	KAYNVTQAF	NA	NA	peptideci
CASSPGSTDTQYF	nucleocapsid phosphoprotein	CMV	CD8	GMEVTPSGTWL,MEVTPSGTWL,TPSGTWLTY,VTPSGTWLTY	pp50	VTEHDTLLY	peptideci
CASSPGSTDTQYF	nucleocapsid phosphoprotein	Influenza	CD8	GMEVTPSGTWL,MEVTPSGTWL,TPSGTWLTY,VTPSGTWLTY	NP177	LPRRSGAAGA	peptideci
CASSLGTGRGQPQHF	nucleocapsid phosphoprotein	M.tuberculosis	CD4	GMEVTPSGTWL,MEVTPSGTWL,TPSGTWLTY,VTPSGTWLTY	NA	NA	peptideci
CASSFPDTQYF	nucleocapsid phosphoprotein	CMV	CD8	GMEVTPSGTWL,MEVTPSGTWL,TPSGTWLTY,VTPSGTWLTY	IE-1	CRVLCCYVL	peptideci
CASSLAGGTDTQYF	nucleocapsid phosphoprotein	M.tuberculosis	CD8	GMEVTPSGTWL,MEVTPSGTWL,TPSGTWLTY,VTPSGTWLTY	NA	NA	peptideci
CASSLANNSPLHF	nucleocapsid phosphoprotein	M.tuberculosis	CD4	GMEVTPSGTWL,MEVTPSGTWL,TPSGTWLTY,VTPSGTWLTY	NA	NA	peptideci
CASSLGGTDTQYF	nucleocapsid phosphoprotein	M.tuberculosis	CD4	GMEVTPSGTWL,MEVTPSGTWL,TPSGTWLTY,VTPSGTWLTY	NA	NA	peptideci peptidecii
CASSLDSNQPQHF	nucleocapsid phosphoprotein	Inflammatory bowel disease (IBD)	CD4	GMEVTPSGTWL,MEVTPSGTWL,TPSGTWLTY,VTPSGTWLTY	Flagellin	NA	peptideci
CASSLGYTEAFF	nucleocapsid phosphoprotein	HIV	CD8	GMEVTPSGTWL,MEVTPSGTWL,TPSGTWLTY,VTPSGTWLTY	Gag	TPQDLNTML	peptideci
CASSRTSGNTDTQYF	nucleocapsid phosphoprotein	M.tuberculosis	CD4	GMEVTPSGTWL,MEVTPSGTWL,TPSGTWLTY,VTPSGTWLTY	NA	NA	peptideci
CASSGQGAYEQYF	nucleocapsid phosphoprotein	YFV	CD8	GMEVTPSGTWL,MEVTPSGTWL,TPSGTWLTY,VTPSGTWLTY	YFV-17D	LLWNGPMAV	peptideci
CASSLGLYNEQFF	nucleocapsid phosphoprotein	M.tuberculosis	CD4	GMEVTPSGTWL,MEVTPSGTWL,TPSGTWLTY,VTPSGTWLTY	NA	NA	peptideci
CASSYGDTQYF	nucleocapsid phosphoprotein	Influenza	CD8	GMEVTPSGTWL,MEVTPSGTWL,TPSGTWLTY,VTPSGTWLTY	NP177	LPRRSGAAGA	peptideci
CASSLGVGTEAFF	nucleocapsid phosphoprotein	Influenza	CD8	GMEVTPSGTWL,MEVTPSGTWL,TPSGTWLTY,VTPSGTWLTY	Matrix protein (M1)	GILGFVFTL	peptideci
CASSLGVGTEAFF	nucleocapsid phosphoprotein	Melanoma		GMEVTPSGTWL,MEVTPSGTWL,TPSGTWLTY,VTPSGTWLTY	Melan-A/MART-1	ELAGIGILTV	peptideci
CASSGTSGGNEQFF	nucleocapsid phosphoprotein	M.tuberculosis	CD8	GMEVTPSGTWL,MEVTPSGTWL,TPSGTWLTY,VTPSGTWLTY	NA	NA	peptideci
CASSMGQGTYEQYF	nucleocapsid phosphoprotein	Influenza	CD8	GMEVTPSGTWL,MEVTPSGTWL,TPSGTWLTY,VTPSGTWLTY	Matrix protein (M1)	GILGFVFTL	peptideci
CASSQAGAEAFF	nucleocapsid phosphoprotein	M.tuberculosis	CD4	GMEVTPSGTWL,MEVTPSGTWL,TPSGTWLTY,VTPSGTWLTY	NA	NA	peptideci
CASSPGPYEQYF	nucleocapsid phosphoprotein	Neoantigen		AYKTFPPTEPK,KTFPPTEPK	AGL-GLI	QLIPCMDVV	peptideci
CASSPGPYEQYF	nucleocapsid phosphoprotein	Psoriatic arthritis		AYKTFPPTEPK,KTFPPTEPK	NA	NA	peptideci
CASSRSRGTEAFF	nucleocapsid phosphoprotein	M.tuberculosis	CD4	AYKTFPPTEPK,KTFPPTEPK	NA	NA	peptideci
CASSFGGTQYF	nucleocapsid phosphoprotein	Influenza	CD8	AYKTFPPTEPK,KTFPPTEPK	Matrix protein (M1)	GILGFVFTL	peptideci
CASSVAGTGDYEQYF	nucleocapsid phosphoprotein	Influenza	CD4	AYKTFPPTEPK,KTFPPTEPK	HA	PKYVKQNTLKLAT	peptideci
CASSRGGQPQHF	nucleocapsid phosphoprotein	M.tuberculosis	CD4	AYKTFPPTEPK,KTFPPTEPK	NA	NA	peptideci
CASSPGGYNEQFF	nucleocapsid phosphoprotein	M.tuberculosis	CD4	AYKTFPPTEPK,KTFPPTEPK	NA	NA	peptideci
CASSLAGGYTF	nucleocapsid phosphoprotein	HIV	CD8	AYKTFPPTEPK,KTFPPTEPK	Gag p24	KAFSPEVIPMF	peptideci
CASSRASGELFF	nucleocapsid phosphoprotein	M.tuberculosis	CD4	AYKTFPPTEPK,KTFPPTEPK	NA	NA	peptideci
CASSDQGPDTQYF	nucleocapsid phosphoprotein	CMV	CD8	AYKTFPPTEPK,KTFPPTEPK	pp65	RPHERNGFTVL	peptideci
CASSLGGQSSYEQYF	nucleocapsid phosphoprotein	CMV	CD8	FSKQLQQSM	IE-1	CRVLCCYVL	peptideci
CASSLNSNQPQHF	ORF10	M.tuberculosis	CD4	AFPFTIYSL,GYINVFAFPF,INVFAFPFTI,MGYINVFAF,NVFAFPFTI,NVFAFPFTIY,YINVFAFPF	NA	NA	peptideci
CASSFSYEQYF	ORF10	Celiac disease	CD4	AFPFTIYSL,GYINVFAFPF,INVFAFPFTI,MGYINVFAF,NVFAFPFTI,NVFAFPFTIY,YINVFAFPF	NA	NA	peptideci
CASSFSYEQYF	ORF10	M.tuberculosis	CD4	AFPFTIYSL,GYINVFAFPF,INVFAFPFTI,MGYINVFAF,NVFAFPFTI,NVFAFPFTIY,YINVFAFPF	NA	NA	peptideci
CASSLSYEQYF	ORF10	Influenza	CD8	AFPFTIYSL,GYINVFAFPF,INVFAFPFTI,MGYINVFAF,NVFAFPFTI,NVFAFPFTIY,YINVFAFPF	NP177	LPRRSGAAGA	peptideci peptidecii
CASSLSYEQYF	ORF10	Neoantigen		AFPFTIYSL,GYINVFAFPF,INVFAFPFTI,MGYINVFAF,NVFAFPFTI,NVFAFPFTIY,YINVFAFPF	PIGN-FLT-P7H	FLTVFSHFM	peptideci peptidecii
CASSLSYEQYF	ORF10	M.tuberculosis	CD4	AFPFTIYSL,GYINVFAFPF,INVFAFPFTI,MGYINVFAF,NVFAFPFTI,NVFAFPFTIY,YINVFAFPF	NA	NA	peptideci peptidecii
CASSLGTEAFF	ORF10	Influenza	CD8	AFPFTIYSL,GYINVFAFPF,INVFAFPFTI,MGYINVFAF,NVFAFPFTI,NVFAFPFTIY,YINVFAFPF	NP177	LPRRSGAAGA	peptideci
CASSLGNEQFF	ORF10	CMV	CD8	AFPFTIYSL,GYINVFAFPF,INVFAFPFTI,MGYINVFAF,NVFAFPFTI,NVFAFPFTIY,YINVFAFPF	pp65	NLVPMVATV	peptideci
CASSFSGGEQYF	ORF10	M.tuberculosis	CD4	AFPFTIYSL,GYINVFAFPF,INVFAFPFTI,MGYINVFAF,NVFAFPFTI,NVFAFPFTIY,YINVFAFPF	NA	NA	peptideci
CASSPRLAGQETQYF	ORF10	M.tuberculosis	CD4	AFPFTIYSL,GYINVFAFPF,INVFAFPFTI,MGYINVFAF,NVFAFPFTI,NVFAFPFTIY,YINVFAFPF	NA	NA	peptideci
CASSLVGQGSYEQYF	ORF10	EBV	CD8	AFPFTIYSL,GYINVFAFPF,INVFAFPFTI,MGYINVFAF,NVFAFPFTI,NVFAFPFTIY,YINVFAFPF	BMLF-1	GLCTLVAML	peptideci
CASSLAGSQETQYF	ORF10	M.tuberculosis	CD4	AFPFTIYSL,GYINVFAFPF,INVFAFPFTI,MGYINVFAF,NVFAFPFTI,NVFAFPFTIY,YINVFAFPF	NA	NA	peptideci
CASSSGTVSYEQYF	ORF10	YFV	CD8	AFPFTIYSL,GYINVFAFPF,INVFAFPFTI,MGYINVFAF,NVFAFPFTI,NVFAFPFTIY,YINVFAFPF	YFV-17D	LLWNGPMAV	peptideci
CASSSGTVSYEQYF	ORF10	Influenza	CD8	AFPFTIYSL,GYINVFAFPF,INVFAFPFTI,MGYINVFAF,NVFAFPFTI,NVFAFPFTIY,YINVFAFPF	NP177	LPRRSGAAGA	peptideci
CASSLGVNTEAFF	ORF10	Influenza	CD8	AFPFTIYSL,GYINVFAFPF,INVFAFPFTI,MGYINVFAF,NVFAFPFTI,NVFAFPFTIY,YINVFAFPF	NP	DATYQRTRALVR	peptideci peptidecii
CASSSTGETQYF	ORF10	CMV	CD8	AFPFTIYSL,GYINVFAFPF,INVFAFPFTI,MGYINVFAF,NVFAFPFTI,NVFAFPFTIY,YINVFAFPF	pp65	RPHERNGFTVL	peptideci
CASSSTDTQYF	ORF10	Inflammatory bowel disease (IBD)	CD4	AFPFTIYSL,GYINVFAFPF,INVFAFPFTI,MGYINVFAF,NVFAFPFTI,NVFAFPFTIY,YINVFAFPF	Flagellin	NA	peptideci peptidecii
CSVVRDTEAFF	ORF10	M.tuberculosis	CD4	AFPFTIYSL,GYINVFAFPF,INVFAFPFTI,MGYINVFAF,NVFAFPFTI,NVFAFPFTIY,YINVFAFPF	NA	NA	peptideci
CASSPTGNEQFF	ORF10	Neoantigen		AFPFTIYSL,GYINVFAFPF,INVFAFPFTI,MGYINVFAF,NVFAFPFTI,NVFAFPFTIY,YINVFAFPF	WDR46-FLT-T3I	FLIYLDVSV	peptideci
CASSLTSEQFF	ORF10	CMV	CD8	AFPFTIYSL,GYINVFAFPF,INVFAFPFTI,MGYINVFAF,NVFAFPFTI,NVFAFPFTIY,YINVFAFPF	pp65	NLVPMVATV	peptideci
CASSFAGELFF	ORF10	CMV	CD8	AFPFTIYSL,GYINVFAFPF,INVFAFPFTI,MGYINVFAF,NVFAFPFTI,NVFAFPFTIY,YINVFAFPF	IE2	NEGVKAAW	peptideci
CASSPTGELFF	ORF10	Psoriatic arthritis		AFPFTIYSL,GYINVFAFPF,INVFAFPFTI,MGYINVFAF,NVFAFPFTI,NVFAFPFTIY,YINVFAFPF	NA	NA	peptideci
CASSFGGTQYF	ORF10	Influenza	CD8	AFPFTIYSL,GYINVFAFPF,INVFAFPFTI,MGYINVFAF,NVFAFPFTI,NVFAFPFTIY,YINVFAFPF	Matrix protein (M1)	GILGFVFTL	peptideci
CASSWGLYNEQFF	ORF10	M.tuberculosis	CD4	AFPFTIYSL,GYINVFAFPF,INVFAFPFTI,MGYINVFAF,NVFAFPFTI,NVFAFPFTIY,YINVFAFPF	NA	NA	peptideci
CASSLEGEKLFF	ORF10	Neoantigen		AFPFTIYSL,GYINVFAFPF,INVFAFPFTI,MGYINVFAF,NVFAFPFTI,NVFAFPFTIY,YINVFAFPF	PHKA2-LLS-SF	LLSIIFFPA	peptideci
CASSSTGELFF	ORF10	Celiac disease	CD4	AFPFTIYSL,GYINVFAFPF,INVFAFPFTI,MGYINVFAF,NVFAFPFTI,NVFAFPFTIY,YINVFAFPF	NA	NA	peptideci
CASSSTGELFF	ORF10	CMV	CD8	AFPFTIYSL,GYINVFAFPF,INVFAFPFTI,MGYINVFAF,NVFAFPFTI,NVFAFPFTIY,YINVFAFPF	pp65	RPHERNGFTVL	peptideci
CASSSTGAGTDTQYF	ORF10	EBV	CD8	AFPFTIYSL,GYINVFAFPF,INVFAFPFTI,MGYINVFAF,NVFAFPFTI,NVFAFPFTIY,YINVFAFPF	BMLF-1	GLCTLVAML	peptideci
CASSLGYEQYF	ORF10	Influenza	CD8	AFPFTIYSL,GYINVFAFPF,INVFAFPFTI,MGYINVFAF,NVFAFPFTI,NVFAFPFTIY,YINVFAFPF	NP177	LPRRSGAAGA	peptideci
CASSLGYEQYF	ORF10	Celiac disease	CD4	AFPFTIYSL,GYINVFAFPF,INVFAFPFTI,MGYINVFAF,NVFAFPFTI,NVFAFPFTIY,YINVFAFPF	NA	NA	peptideci
CASSLGYEQYF	ORF10	M.tuberculosis	CD4	AFPFTIYSL,GYINVFAFPF,INVFAFPFTI,MGYINVFAF,NVFAFPFTI,NVFAFPFTIY,YINVFAFPF	NA	NA	peptideci
CASSGGYEQYF	ORF10	YFV		AFPFTIYSL,GYINVFAFPF,INVFAFPFTI,MGYINVFAF,NVFAFPFTI,NVFAFPFTIY,YINVFAFPF	YFV-LLW	LLWNGPMAV	peptideci
CASSYTGELFF	ORF10	Influenza	CD8	AFPFTIYSL,GYINVFAFPF,INVFAFPFTI,MGYINVFAF,NVFAFPFTI,NVFAFPFTIY,YINVFAFPF	NP177	LPRRSGAAGA	peptideci
CASSYTGELFF	ORF10	HCV	CD8	AFPFTIYSL,GYINVFAFPF,INVFAFPFTI,MGYINVFAF,NVFAFPFTI,NVFAFPFTIY,YINVFAFPF	NS3	KLVALGINAV	peptideci
CASSASGEQFF	ORF10	M.tuberculosis	CD4	AFPFTIYSL,GYINVFAFPF,INVFAFPFTI,MGYINVFAF,NVFAFPFTI,NVFAFPFTIY,YINVFAFPF	NA	NA	peptideci
CASSFKDTQYF	ORF10	M.tuberculosis	CD4	AFPFTIYSL,GYINVFAFPF,INVFAFPFTI,MGYINVFAF,NVFAFPFTI,NVFAFPFTIY,YINVFAFPF	NA	NA	peptideci
CASSVSGNTIYF	ORF10	M.tuberculosis	CD4	AFPFTIYSL,GYINVFAFPF,INVFAFPFTI,MGYINVFAF,NVFAFPFTI,NVFAFPFTIY,YINVFAFPF	NA	NA	peptideci
CASSLTDTQYF	ORF10	Breast Cancer	CD8	AFPFTIYSL,GYINVFAFPF,INVFAFPFTI,MGYINVFAF,NVFAFPFTI,NVFAFPFTIY,YINVFAFPF	NA	NA	peptideci
CASSLTDTQYF	ORF10	CMV	CD8	AFPFTIYSL,GYINVFAFPF,INVFAFPFTI,MGYINVFAF,NVFAFPFTI,NVFAFPFTIY,YINVFAFPF	pp50	VTEHDTLLY	peptideci
CASSLTDTQYF	ORF10	Influenza	CD8	AFPFTIYSL,GYINVFAFPF,INVFAFPFTI,MGYINVFAF,NVFAFPFTI,NVFAFPFTIY,YINVFAFPF	NP177	LPRRSGAAGA	peptideci
CASSSGGTEAFF	ORF10	CMV	CD8	AFPFTIYSL,GYINVFAFPF,INVFAFPFTI,MGYINVFAF,NVFAFPFTI,NVFAFPFTIY,YINVFAFPF	pp65	NLVPMVATV	peptideci
CASSPQGETQYF	ORF10	M.tuberculosis	CD4	AFPFTIYSL,GYINVFAFPF,INVFAFPFTI,MGYINVFAF,NVFAFPFTI,NVFAFPFTIY,YINVFAFPF	NA	NA	peptideci
CASSLEGETQYF	ORF10	Influenza	CD8	AFPFTIYSL,GYINVFAFPF,INVFAFPFTI,MGYINVFAF,NVFAFPFTI,NVFAFPFTIY,YINVFAFPF	Matrix protein (M1)	GILGFVFTL	peptideci
CASSLEGETQYF	ORF10	CMV	CD8	AFPFTIYSL,GYINVFAFPF,INVFAFPFTI,MGYINVFAF,NVFAFPFTI,NVFAFPFTIY,YINVFAFPF	pp65	NLVPMVATV	peptideci
CASSLGYNEQFF	ORF10	M.tuberculosis	CD4	AFPFTIYSL,GYINVFAFPF,INVFAFPFTI,MGYINVFAF,NVFAFPFTI,NVFAFPFTIY,YINVFAFPF	NA	NA	peptideci
CASSLGETQYF	ORF10	Influenza	CD8	AFPFTIYSL,GYINVFAFPF,INVFAFPFTI,MGYINVFAF,NVFAFPFTI,NVFAFPFTIY,YINVFAFPF	NP177	LPRRSGAAGA	peptideci
CASSLGETQYF	ORF10	M.tuberculosis	CD4	AFPFTIYSL,GYINVFAFPF,INVFAFPFTI,MGYINVFAF,NVFAFPFTI,NVFAFPFTIY,YINVFAFPF	NA	NA	peptideci
CASSYGGTEAFF	ORF10	HIV	CD8	AFPFTIYSL,GYINVFAFPF,INVFAFPFTI,MGYINVFAF,NVFAFPFTI,NVFAFPFTIY,YINVFAFPF	Gag	EIYKRWII	peptideci
CASSLGSYEQYF	ORF10	DENV	CD8	AFPFTIYSL,GYINVFAFPF,INVFAFPFTI,MGYINVFAF,NVFAFPFTI,NVFAFPFTIY,YINVFAFPF			peptideci
CASSLGDTQYF	ORF10	Celiac disease	CD4	AFPFTIYSL,GYINVFAFPF,INVFAFPFTI,MGYINVFAF,NVFAFPFTI,NVFAFPFTIY,YINVFAFPF	NA	NA	peptideci peptidecii
CASSYSYEQYF	ORF10	Melanoma	CD8	AFPFTIYSL,GYINVFAFPF,INVFAFPFTI,MGYINVFAF,NVFAFPFTI,NVFAFPFTIY,YINVFAFPF	NA	NA	peptideci peptidecii
CASSLAYEQYF	ORF10	Neoantigen		AFPFTIYSL,GYINVFAFPF,INVFAFPFTI,MGYINVFAF,NVFAFPFTI,NVFAFPFTIY,YINVFAFPF	PGM5	AVGSHVYSV	peptideci
CASSTGLYGYTF	ORF10	Influenza	CD8	AFPFTIYSL,GYINVFAFPF,INVFAFPFTI,MGYINVFAF,NVFAFPFTI,NVFAFPFTIY,YINVFAFPF	M,Matrix protein (M1)	GILGFVFTL	peptideci
CASSLDSYNEQFF	ORF10	Influenza	CD8	AFPFTIYSL,GYINVFAFPF,INVFAFPFTI,MGYINVFAF,NVFAFPFTI,NVFAFPFTIY,YINVFAFPF	NP177	LPRRSGAAGA	peptideci
CASSLQETQYF	ORF10	Inflammatory bowel disease (IBD)	CD4	AFPFTIYSL,GYINVFAFPF,INVFAFPFTI,MGYINVFAF,NVFAFPFTI,NVFAFPFTIY,YINVFAFPF	Flagellin	NA	peptideci
CASSPGGYGYTF	ORF10	M.tuberculosis	CD4	AFPFTIYSL,GYINVFAFPF,INVFAFPFTI,MGYINVFAF,NVFAFPFTI,NVFAFPFTIY,YINVFAFPF	NA	NA	peptideci
CASSQGAYGYTF	ORF10	Influenza	CD8	AFPFTIYSL,GYINVFAFPF,INVFAFPFTI,MGYINVFAF,NVFAFPFTI,NVFAFPFTIY,YINVFAFPF	M,Matrix protein (M1)	GILGFVFTL	peptideci
CASSFTDTQYF	ORF10	CMV	CD8	AFPFTIYSL,GYINVFAFPF,INVFAFPFTI,MGYINVFAF,NVFAFPFTI,NVFAFPFTIY,YINVFAFPF	IE-1	CRVLCCYVL	peptideci
CASSFTDTQYF	ORF10	M.tuberculosis	CD4	AFPFTIYSL,GYINVFAFPF,INVFAFPFTI,MGYINVFAF,NVFAFPFTI,NVFAFPFTIY,YINVFAFPF	NA	NA	peptideci
CASSLGTGELFF	ORF10	CMV	CD8	AFPFTIYSL,GYINVFAFPF,INVFAFPFTI,MGYINVFAF,NVFAFPFTI,NVFAFPFTIY,YINVFAFPF	pp65	NLVPMVATV	peptideci peptidecii
CASSSGTSGYEQYF	ORF10	CMV	CD8	AFPFTIYSL,GYINVFAFPF,INVFAFPFTI,MGYINVFAF,NVFAFPFTI,NVFAFPFTIY,YINVFAFPF	IE1	QIKVRVKMV	peptideci
CASSSAYYGYTF	ORF10	CMV	CD8	AFPFTIYSL,GYINVFAFPF,INVFAFPFTI,MGYINVFAF,NVFAFPFTI,NVFAFPFTIY,YINVFAFPF	pp65,CMV-NV9	NLVPMVATV	peptideci
CASSLAYEQFF	ORF10	Influenza	CD8	AFPFTIYSL,GYINVFAFPF,INVFAFPFTI,MGYINVFAF,NVFAFPFTI,NVFAFPFTIY,YINVFAFPF	Matrix protein (M1)	GILGFVFTL	peptideci
CASSRGGNEQFF	ORF10	M.tuberculosis	CD4	AFPFTIYSL,GYINVFAFPF,INVFAFPFTI,MGYINVFAF,NVFAFPFTI,NVFAFPFTIY,YINVFAFPF	NA	NA	peptideci
CASSLSGAGTDTQYF	ORF10	M.tuberculosis	CD4	AFPFTIYSL,GYINVFAFPF,INVFAFPFTI,MGYINVFAF,NVFAFPFTI,NVFAFPFTIY,YINVFAFPF	NA	NA	peptideci
CASSIGSYGYTF	ORF10	Influenza	CD8	AFPFTIYSL,GYINVFAFPF,INVFAFPFTI,MGYINVFAF,NVFAFPFTI,NVFAFPFTIY,YINVFAFPF	M,M1,Matrix protein (M1)	GILGFVFTL	peptideci
CASSFQGYTEAFF	ORF10	CMV	CD8	AFPFTIYSL,GYINVFAFPF,INVFAFPFTI,MGYINVFAF,NVFAFPFTI,NVFAFPFTIY,YINVFAFPF	pp65	NLVPMVATV	peptideci
CASSLLAGGTDTQYF	ORF10	HIV	CD8	AFPFTIYSL,GYINVFAFPF,INVFAFPFTI,MGYINVFAF,NVFAFPFTI,NVFAFPFTIY,YINVFAFPF	Gag p24	KRWIILGLNK	peptideci
CASSLLAGGTDTQYF	ORF10	Influenza	CD8	AFPFTIYSL,GYINVFAFPF,INVFAFPFTI,MGYINVFAF,NVFAFPFTI,NVFAFPFTIY,YINVFAFPF	NP177	LPRRSGAAGA	peptideci
CASSFGGTEAFF	ORF10	Influenza	CD8	AFPFTIYSL,GYINVFAFPF,INVFAFPFTI,MGYINVFAF,NVFAFPFTI,NVFAFPFTIY,YINVFAFPF	NP177	LPRRSGAAGA	peptideci
CASSLGEKLFF	ORF10	HCV	CD8	AFPFTIYSL,GYINVFAFPF,INVFAFPFTI,MGYINVFAF,NVFAFPFTI,NVFAFPFTIY,YINVFAFPF	NS3	KLVALGINAV	peptideci
CASSYGYEQYF	ORF10	M.tuberculosis	CD4	AFPFTIYSL,GYINVFAFPF,INVFAFPFTI,MGYINVFAF,NVFAFPFTI,NVFAFPFTIY,YINVFAFPF	NA	NA	peptideci
CASSRTGGQPQHF	ORF10	M.tuberculosis	CD4	AFPFTIYSL,GYINVFAFPF,INVFAFPFTI,MGYINVFAF,NVFAFPFTI,NVFAFPFTIY,YINVFAFPF	NA	NA	peptideci
CASSLTGGYGYTF	ORF10	M.tuberculosis	CD4	AFPFTIYSL,GYINVFAFPF,INVFAFPFTI,MGYINVFAF,NVFAFPFTI,NVFAFPFTIY,YINVFAFPF	NA	NA	peptideci
CASSLGQGEAFF	ORF10	EBV	CD8	AFPFTIYSL,GYINVFAFPF,INVFAFPFTI,MGYINVFAF,NVFAFPFTI,NVFAFPFTIY,YINVFAFPF	BMLF-1	GLCTLVAML	peptideci
CASGLAGPNEQFF	ORF10	CMV	CD8	AFPFTIYSL,GYINVFAFPF,INVFAFPFTI,MGYINVFAF,NVFAFPFTI,NVFAFPFTIY,YINVFAFPF	IE-1	CRVLCCYVL	peptideci
CASSGGTGAYEQYF	ORF10	YFV		AFPFTIYSL,GYINVFAFPF,INVFAFPFTI,MGYINVFAF,NVFAFPFTI,NVFAFPFTIY,YINVFAFPF	YFV-LLW	LLWNGPMAV	peptideci
CASSFQGFTEAFF	ORF10	CMV	CD8	AFPFTIYSL,GYINVFAFPF,INVFAFPFTI,MGYINVFAF,NVFAFPFTI,NVFAFPFTIY,YINVFAFPF	pp65	NLVPMVATV	peptideci
CASSLGGEQFF	ORF10	CMV	CD8	AFPFTIYSL,GYINVFAFPF,INVFAFPFTI,MGYINVFAF,NVFAFPFTI,NVFAFPFTIY,YINVFAFPF	pp50	VTEHDTLLY	peptideci
CASSLGGEQFF	ORF10	Influenza	CD8	AFPFTIYSL,GYINVFAFPF,INVFAFPFTI,MGYINVFAF,NVFAFPFTI,NVFAFPFTIY,YINVFAFPF	NP177	LPRRSGAAGA	peptideci
CASSEAGETQYF	ORF10	M.tuberculosis	CD4	AFPFTIYSL,GYINVFAFPF,INVFAFPFTI,MGYINVFAF,NVFAFPFTI,NVFAFPFTIY,YINVFAFPF	NA	NA	peptideci
CASSLAGGSYNEQFF	ORF10	M.tuberculosis	CD4	AFPFTIYSL,GYINVFAFPF,INVFAFPFTI,MGYINVFAF,NVFAFPFTI,NVFAFPFTIY,YINVFAFPF	NA	NA	peptideci
CASSSSGGSTDTQYF	ORF10	M.tuberculosis	CD4	AFPFTIYSL,GYINVFAFPF,INVFAFPFTI,MGYINVFAF,NVFAFPFTI,NVFAFPFTIY,YINVFAFPF	NA	NA	peptideci
CASSLGAYEQYF	ORF10	EBV	CD8	AFPFTIYSL,GYINVFAFPF,INVFAFPFTI,MGYINVFAF,NVFAFPFTI,NVFAFPFTIY,YINVFAFPF	BMLF-1	GLCTLVAML	peptideci
CASSYGSYEQYF	ORF10	HCV	CD8	AFPFTIYSL,GYINVFAFPF,INVFAFPFTI,MGYINVFAF,NVFAFPFTI,NVFAFPFTIY,YINVFAFPF	NS3	KLVALGINAV	peptideci
CASSFMETQYF	ORF10	Neoantigen		AFPFTIYSL,GYINVFAFPF,INVFAFPFTI,MGYINVFAF,NVFAFPFTI,NVFAFPFTIY,YINVFAFPF	MLL2-L8H	ALSPVIPHI	peptideci
CASSPVGYEQYF	ORF10	Neoantigen		AFPFTIYSL,GYINVFAFPF,INVFAFPFTI,MGYINVFAF,NVFAFPFTI,NVFAFPFTIY,YINVFAFPF	GANAB-ALY-S5F	ALYGFVPVL	peptideci
CASSTGAYGYTF	ORF10	Influenza	CD8	AFPFTIYSL,GYINVFAFPF,INVFAFPFTI,MGYINVFAF,NVFAFPFTI,NVFAFPFTIY,YINVFAFPF	Matrix protein (M1)	GILGFVFTL	peptideci
CASSLGGDEQYF	ORF10	Neoantigen		AFPFTIYSL,GYINVFAFPF,INVFAFPFTI,MGYINVFAF,NVFAFPFTI,NVFAFPFTIY,YINVFAFPF	LCP1-NLF	NLFNRYPAL	peptideci
CASSVTETQYF	ORF10	M.tuberculosis	CD4	AFPFTIYSL,GYINVFAFPF,INVFAFPFTI,MGYINVFAF,NVFAFPFTI,NVFAFPFTIY,YINVFAFPF	NA	NA	peptideci
CASSLADTQYF	ORF10	M.tuberculosis	CD4	AFPFTIYSL,GYINVFAFPF,INVFAFPFTI,MGYINVFAF,NVFAFPFTI,NVFAFPFTIY,YINVFAFPF	NA	NA	peptideci
CASSYKETQYF	ORF10	M.tuberculosis	CD4	AFPFTIYSL,GYINVFAFPF,INVFAFPFTI,MGYINVFAF,NVFAFPFTI,NVFAFPFTIY,YINVFAFPF	NA	NA	peptideci
CASSPSNTGELFF	ORF10	M.tuberculosis	CD4	AFPFTIYSL,GYINVFAFPF,INVFAFPFTI,MGYINVFAF,NVFAFPFTI,NVFAFPFTIY,YINVFAFPF	NA	NA	peptideci peptidecii
CASSPGSYNEQFF	ORF10	M.tuberculosis	CD4	AFPFTIYSL,GYINVFAFPF,INVFAFPFTI,MGYINVFAF,NVFAFPFTI,NVFAFPFTIY,YINVFAFPF	NA	NA	peptideci
CASSSSYEQYF	ORF10	Influenza	CD8	AFPFTIYSL,GYINVFAFPF,INVFAFPFTI,MGYINVFAF,NVFAFPFTI,NVFAFPFTIY,YINVFAFPF	NP177	LPRRSGAAGA	peptideci
CASSPGGETQYF	ORF10	M.tuberculosis	CD4	AFPFTIYSL,GYINVFAFPF,INVFAFPFTI,MGYINVFAF,NVFAFPFTI,NVFAFPFTIY,YINVFAFPF	NA	NA	peptideci
CASSFGADTQYF	ORF10	HCV	CD8	AFPFTIYSL,GYINVFAFPF,INVFAFPFTI,MGYINVFAF,NVFAFPFTI,NVFAFPFTIY,YINVFAFPF	NS3	KLVALGINAV	peptideci
CASSLSPNEQFF	ORF10	Influenza	CD8	AFPFTIYSL,GYINVFAFPF,INVFAFPFTI,MGYINVFAF,NVFAFPFTI,NVFAFPFTIY,YINVFAFPF	NP177	LPRRSGAAGA	peptideci
CASSYPGELFF	ORF10	CMV	CD8	AFPFTIYSL,GYINVFAFPF,INVFAFPFTI,MGYINVFAF,NVFAFPFTI,NVFAFPFTIY,YINVFAFPF	IE-1	CRVLCCYVL	peptideci
CASSLVGYGYTF	ORF10	M.tuberculosis	CD4	AFPFTIYSL,GYINVFAFPF,INVFAFPFTI,MGYINVFAF,NVFAFPFTI,NVFAFPFTIY,YINVFAFPF	NA	NA	peptideci
CASSPRTSGTYEQYF	ORF10	HIV	CD4 CD8	AFPFTIYSL,GYINVFAFPF,INVFAFPFTI,MGYINVFAF,NVFAFPFTI,NVFAFPFTIY,YINVFAFPF	Gag,Gag polyprotein RQ13	FRDYVDRFYKTLRAEQASQE,RFYKTLRAEQASQ	peptideci
CASSFGDTQYF	ORF10	CMV	CD8	AFPFTIYSL,GYINVFAFPF,INVFAFPFTI,MGYINVFAF,NVFAFPFTI,NVFAFPFTIY,YINVFAFPF	IE-1	CRVLCCYVL	peptideci
CASSPGGGELFF	ORF10	Neoantigen		AFPFTIYSL,GYINVFAFPF,INVFAFPFTI,MGYINVFAF,NVFAFPFTI,NVFAFPFTIY,YINVFAFPF	OR5M3-KMV-T8N	KMVAVFYNT	peptideci
CASSFTEAFF	ORF10	M.tuberculosis	CD8	AFPFTIYSL,GYINVFAFPF,INVFAFPFTI,MGYINVFAF,NVFAFPFTI,NVFAFPFTIY,YINVFAFPF	NA	NA	peptideci
CASSLLGEQFF	ORF10	M.tuberculosis	CD4	AFPFTIYSL,GYINVFAFPF,INVFAFPFTI,MGYINVFAF,NVFAFPFTI,NVFAFPFTIY,YINVFAFPF	NA	NA	peptideci
CASSGNEQFF	ORF10	DENV	CD8	AFPFTIYSL,GYINVFAFPF,INVFAFPFTI,MGYINVFAF,NVFAFPFTI,NVFAFPFTIY,YINVFAFPF			peptideci
CASSLAGGYTF	ORF10	HIV	CD8	AFPFTIYSL,GYINVFAFPF,INVFAFPFTI,MGYINVFAF,NVFAFPFTI,NVFAFPFTIY,YINVFAFPF	Gag p24	KAFSPEVIPMF	peptideci
CASSPGTGAYEQYF	ORF10	YFV	CD8	AFPFTIYSL,GYINVFAFPF,INVFAFPFTI,MGYINVFAF,NVFAFPFTI,NVFAFPFTIY,YINVFAFPF	YFV-17D	LLWNGPMAV	peptideci
CASSLTYEQYF	ORF10	M.tuberculosis	CD4	AFPFTIYSL,GYINVFAFPF,INVFAFPFTI,MGYINVFAF,NVFAFPFTI,NVFAFPFTIY,YINVFAFPF	NA	NA	peptideci peptidecii
CASSLAGTYEQYF	ORF10	Influenza	CD8	AFPFTIYSL,GYINVFAFPF,INVFAFPFTI,MGYINVFAF,NVFAFPFTI,NVFAFPFTIY,YINVFAFPF	NP177	LPRRSGAAGA	peptideci
CASSLRDGTEAFF	ORF10	M.tuberculosis	CD4	AFPFTIYSL,GYINVFAFPF,INVFAFPFTI,MGYINVFAF,NVFAFPFTI,NVFAFPFTIY,YINVFAFPF	NA	NA	peptideci
CASSLTGELFF	ORF10	M.tuberculosis	CD4	AFPFTIYSL,GYINVFAFPF,INVFAFPFTI,MGYINVFAF,NVFAFPFTI,NVFAFPFTIY,YINVFAFPF	NA	NA	peptideci
CASSLGLGQPQHF	ORF10	Melanoma		AFPFTIYSL,GYINVFAFPF,INVFAFPFTI,MGYINVFAF,NVFAFPFTI,NVFAFPFTIY,YINVFAFPF	Melan-A/MART-1	ELAGIGILTV	peptideci
CASSLSGPYNEQFF	ORF10	Influenza	CD8	AFPFTIYSL,GYINVFAFPF,INVFAFPFTI,MGYINVFAF,NVFAFPFTI,NVFAFPFTIY,YINVFAFPF	NP177	LPRRSGAAGA	peptideci
CASSRQETQYF	ORF10	M.tuberculosis	CD4	AFPFTIYSL,GYINVFAFPF,INVFAFPFTI,MGYINVFAF,NVFAFPFTI,NVFAFPFTIY,YINVFAFPF	NA	NA	peptideci
[truncated: 138 more rows]

## Sheet: Table_S6
Unique cross-reactive counts of all MIRA T cell CDR3 sequences and the corresponding categories of cross-reactive pathogens. Unique numbers of SARS-CoV-2 antigen connections to other pathogens' and diseases' antigens via MIRA (files peptide-detail-ci, peptide-detail-cii and minigene-detail) CDR3 sequences, that have been grouped in 3 categories. Category 1 includes viruses and bacteria. Category …
Disease	Category	CDR3-mediated connections	CD8+	CD4+	CD8+,CD4+
M.tuberculosis	1	747	65	680	2
Influenza	1	498	485	10	2
CMV	1	217	217	0	0
EBV	1	135	133	0	0
HIV	1	68	60	2	6
HCV	1	49	42	0	0
YFV	1	42	28	0	0
DENV	1	33	33	0	0
HTLV-1	1	3	3	0	0
Neoantigen	2	178	10	0	0
Melanoma	2	27	12	0	0
Breast Cancer	2	6	6	0	0
Celiac disease	3	77	0	77	0
Inflammatory bowel disease (IBD)	3	17	0	17	0
Diabetes Type 1	3	16	0	16	0
Psoriatic arthritis	3	13	0	0	0
Allergy	3	6	0	2	0
Toxic epidermal necrolysis	3	4	4	0	0
	Total	2136	1098	804	10
